# Supplementary material for: Retrospective evaluation of whole exome and genome mutation calls in 746 cancer samples
Source: Nat Commun. 2020 Sep 21;11:4748. doi: 10.1038/s41467-020-18151-y (PMC7505971; doi:10.1038/s41467-020-18151-y)
Supplement: Supplementary file 3 — Supplementary Data 1 [file 41467_2020_18151_MOESM3_ESM.xlsx]

## Sheet: ToC
Table of Contents
Supplementary Data 1	Samples used
Supplementary Data 2	Filter criteria
Supplementary Data 3	TCGA subtype selection preference to WGS sequencing
Supplementary Data 4	Misannotated variants between WES and WGS
Supplementary Data 5	Mutation spectrum comparison by cancer
Supplementary Data 6	WGS specific cancer mutations

## Sheet: Supplementary Data 1
Supplementary Data 1	Samples used
tcga_pcawg_aliquot_id	mc3_exome_analysis_id	mc3_exome_barcode	tcga_wgs_barcode	pcawg_donor_id	NOTES for missing MC3	NOTES for missing PCAWG
301d6ce3-4099-4c1d-8e50-c04b7ce91450	cff85078-9018-4a16-bbd8-c9bc48a02e92	TCGA-BT-A20T-01A-11D-A14W-08	TCGA-BT-A20T-01A-11D-A14W-08	DO804	#N/A	#N/A
4838b5a9-968c-4178-bffb-3fafe1f6dc09	5f1bdcff-1fb2-4809-b761-e62dddf316bc	TCGA-DK-A3IL-01A-11D-A20D-08	TCGA-DK-A3IL-01A-11D-A20D-08	DO555	#N/A	#N/A
c66c92d5-df65-46e6-861d-d8a98808e6a3	854ee68d-1b9b-4493-b33b-c863a78abfc2	TCGA-CF-A3MF-01A-12D-A21A-08	TCGA-CF-A3MF-01A-12D-A21A-08	DO479	#N/A	#N/A
973d0577-8ca4-44a1-817f-1d3c1bada151	a9e2d209-ff7c-4e9e-a8fc-285582837e0c	TCGA-BT-A20V-01A-11D-A14W-08	TCGA-BT-A20V-01A-11D-A14W-08	DO689	#N/A	#N/A
91f458e6-64b7-454d-a542-b0aa23638fd8	e5a3d8e8-d31b-42d6-b61e-06c7afbdfdf0	TCGA-DK-A1A7-01A-11D-A13W-08	TCGA-DK-A1A7-01A-11D-A13W-08	DO483	#N/A	#N/A
8c619cbc-9e91-4716-9711-5236e55d8f46	47dc5edf-139f-43e0-bd04-73cd0b84fb43	TCGA-BT-A20Q-01A-11D-A14W-08	TCGA-BT-A20Q-01A-11D-A14W-08	DO695	#N/A	#N/A
abd2d959-d5ed-4eb3-9759-67eb1aa23325	3e636d0b-1073-4178-88f0-f673c25e3abb	TCGA-DK-A1AE-01A-11D-A13W-08	TCGA-DK-A1AE-01A-11D-A13W-08	DO498	#N/A	#N/A
0c7aca3f-e006-4de3-afc2-20b4f727d4fd	41e712c8-69b4-4c61-9e45-ec137a73ea4d	TCGA-BL-A13J-01A-11D-A271-08	TCGA-BL-A13J-01A-11D-A10S-08	DO536	#N/A	#N/A
804ffa2e-158b-447d-945c-707684134c87	bc4045e9-5a30-47a5-8370-ceec23f2def3	TCGA-DK-A1AA-01A-11D-A13W-08	TCGA-DK-A1AA-01A-11D-A13W-08	DO548	#N/A	#N/A
2b142863-b963-4cc9-8f8f-c72503c93390	0daf2e9a-2a4f-4572-ac83-859f842680de	TCGA-GD-A2C5-01A-12D-A17V-08	TCGA-GD-A2C5-01A-12D-A17V-08	DO496	#N/A	#N/A
45a7949d-e63f-4956-866c-df51257032de	741f5007-770e-44a4-ab54-7387541005fb	TCGA-BT-A2LA-01A-11D-A18F-08	TCGA-BT-A2LA-01A-11D-A18F-08	DO561	#N/A	#N/A
acc629cb-ad03-4cec-9b21-922e4932ef3e	8a1c03e9-d3e0-4538-a275-20fc6e4c46c2	TCGA-CF-A27C-01A-11D-A16O-08	TCGA-CF-A27C-01A-11D-A16O-08	DO828	#N/A	#N/A
d4615ca0-b5c7-4a5c-8593-bd50034a78ae	61c1b363-6b90-4279-bb5e-013fbe82a09e	TCGA-FD-A3N6-01A-11D-A21A-08	TCGA-FD-A3N6-01A-11D-A21A-08	DO575	#N/A	#N/A
448fe471-3f4e-4dc8-a4e0-6f147dc93abe	3163ce6b-b4fa-4bfa-b9d8-f9a9f8cbe603	TCGA-DK-A1A5-01A-11D-A13W-08	TCGA-DK-A1A5-01A-11D-A13W-08	DO477	#N/A	#N/A
cda1a403-16b6-487c-a82a-c377d1d0f89d	d184ffb3-6853-4727-928d-ce45ee08a44c	TCGA-BT-A3PH-01A-11D-A21Z-08	TCGA-BT-A3PH-01A-11D-A21Z-08	DO856	#N/A	#N/A
df8a913c-5160-4fc5-950d-7c890e24e820	9a9df54d-4b37-4f08-ba00-494c79f86677	TCGA-DK-A1A6-01A-11D-A13W-08	TCGA-DK-A1A6-01A-11D-A13W-08	#N/A	Sample mix-up in TCGA-DK-A1A6-06A-11D-A42E-08	#N/A
418a3dec-96ff-4719-becb-e1a8260cce2f	cf40432b-9a93-4a21-8c35-3a6e985243f2	TCGA-FD-A3N5-01A-11D-A21A-08	TCGA-FD-A3N5-01A-11D-A21A-08	DO639	#N/A	#N/A
f389176f-d8f3-45c2-aae4-7378a3d6fc7f	d4c161d4-a139-426c-ac6b-d3b8b0dbb334	TCGA-C4-A0F7-01A-11D-A10S-08	TCGA-C4-A0F7-01A-11D-A10S-08	DO669	#N/A	#N/A
b73523d7-f5a5-4140-8537-4df4d1ecf465	ee562a4a-af10-446a-ad53-d576f3e21c1a	TCGA-BT-A3PJ-01A-21D-A21Z-08	TCGA-BT-A3PJ-01A-21D-A21Z-08	DO44097	#N/A	#N/A
ffdd4feb-aca3-4104-b1e8-954d705a6450	4d3752be-7833-4164-bcdc-b1e16c91dc08	TCGA-FT-A3EE-01A-11D-A202-08	TCGA-FT-A3EE-01A-11D-A202-08	DO720	#N/A	#N/A
94108975-b7a0-40ba-ad39-e44cc62e8cc0	e40e6d93-43a9-4adb-9a04-315fdbb237b2	TCGA-H4-A2HQ-01A-11D-A17V-08	TCGA-H4-A2HQ-01A-11D-A17V-08	DO522	#N/A	#N/A
e6c78a98-f45b-482b-a551-4f11b8c1ff8b	242bea7a-8ea6-4713-bdad-c8ebe0ca0aa7	TCGA-BT-A20P-01A-11D-A14W-08	TCGA-BT-A20P-01A-11D-A14W-08	DO675	#N/A	#N/A
7d2a22eb-7344-4cba-ad7d-94c3f9ef3d7c	65e71a23-a050-4a0e-b576-15575130642e	TCGA-DK-A1AG-01A-11D-A13W-08	TCGA-DK-A1AG-01A-11D-A13W-08	DO822	#N/A	#N/A
a876398c-5b1d-444f-a360-5fe2db697480	0a36086d-933d-4a3a-a1c3-6fc014cdc79e	TCGA-B6-A0I6-01A-11W-A100-09	TCGA-B6-A0I6-01A-11D-A128-09	#N/A	syn:syn5877280 Not processed by BROAD F,F	#N/A
f848b66f-bd9e-4fba-afd4-eb58848d1ef4	cc19e7a4-7d06-408d-aed3-cbd6e88cf41c	TCGA-AN-A0AT-01A-11D-A045-09	TCGA-AN-A0AT-01A-11D-A045-09	DO2783	#N/A	#N/A
e5593865-5f8e-4a4c-b36f-73fbe64d66da	2c2a70b1-1b8c-4a1b-9ec7-c841733a6bbd	TCGA-A2-A0D1-01A-11W-A050-09	TCGA-A2-A0D1-01A-11D-A19H-09	DO3958	#N/A	#N/A
1eb62abc-7928-405b-84cc-f091ca5347b2	60ff37a0-4a6b-4487-86d4-c74a7009091c	TCGA-B6-A0RE-01A-11W-A071-09	TCGA-B6-A0RE-01A-11D-A128-09	DO3482	#N/A	#N/A
dabb5a94-9706-4429-8db0-c328e2004340	9627ff1b-8adf-4973-97da-d4fbfef05a06	TCGA-E2-A15E-06A-11D-A12B-09	TCGA-E2-A15E-06A-11D-A19H-09	DO2629	#N/A	#N/A
ec4d4cbc-d5d1-418d-a292-cad9576624fd	6c11e452-893e-4069-9bc6-c4837e25318e	TCGA-BH-A0DG-01A-21D-A12Q-09	TCGA-BH-A0DG-01A-21D-A12Q-09	DO1257	#N/A	#N/A
6764e0a2-7a78-45c1-9189-6001c6518ce4	9ade7b5d-e68b-41c3-9a46-c03e079f6c7a	TCGA-D8-A27H-01A-11D-A16D-09	TCGA-D8-A27H-01A-11D-A314-09	DO1249	#N/A	#N/A
8f558713-f32b-403b-aedf-c79efeb41c67	c33dad45-5797-44f4-9eed-badc3c850ec2	TCGA-AO-A03L-01A-41W-A071-09	TCGA-AO-A03L-01A-41D-A19H-09	DO3458	#N/A	#N/A
fc6d77a9-121b-48ab-a899-713c3d1319a2	c4036e99-6223-4474-b113-8f68eed30b31	TCGA-D8-A27F-01A-11D-A16D-09	TCGA-D8-A27F-01A-11D-A16D-09	DO1274	#N/A	#N/A
987d41ee-6bab-490c-b0f2-bf28c0089de9	7f520e83-2628-4e71-a96b-3220bdefdf2d	TCGA-A8-A09I-01A-22W-A050-09	TCGA-A8-A09I-01A-22D-A19H-09	DO3188	#N/A	#N/A
d8fbb398-d1da-4444-984a-22c8523625da	27ce5907-0c3a-4dc7-b268-1f042068c4a9	TCGA-A2-A3Y0-01A-11D-A23C-09	TCGA-A2-A3Y0-01A-11D-A23C-09	DO44273	#N/A	#N/A
f39cc911-36a7-4c06-9e91-4ad86281db3d	4addb1e3-fe9b-4d46-b043-99417557d45a	TCGA-E2-A15K-06A-11D-A12Q-09	TCGA-E2-A15K-06A-11D-A12Q-09	DO3352	#N/A	#N/A
43f7a2e0-fec9-4e43-872d-18c6c946fa17	72551223-1a8f-4ae4-842d-6cadc38481d0	TCGA-BH-A0B3-01A-11W-A071-09	TCGA-BH-A0B3-01A-11D-A128-09	DO1301	#N/A	#N/A
7b0b60c7-5fa0-440e-937f-8d82119330d6	2664d516-76eb-4b4f-b909-be4984521944	TCGA-AR-A2LK-01A-11D-A17W-09	TCGA-AR-A2LK-01A-11D-A17W-09	DO1281	#N/A	#N/A
4e84eed6-82a8-4e91-b0fd-61ec6ef69ce9	7347ace4-06be-45cc-a537-36384ed5eeb5	TCGA-E2-A1LK-01A-21D-A14G-09	TCGA-E2-A1LK-01A-21D-A14G-09	DO2719	#N/A	#N/A
eef9dce1-6ba6-432b-bbe2-53c7dbe64fe7	8c391ec0-80e3-4f4a-a571-6c941005cfe1	TCGA-BH-A0EA-01A-11D-A10Y-09	TCGA-BH-A0EA-01A-11D-A314-09	DO3152	#N/A	Missing from representative MAF (2583) syn:syn7364923
e8392f20-c9e3-4649-b64f-5b266c393a76	31fcb8a1-92d2-49fb-9d61-e40bc2588b9d	TCGA-BH-A0E0-01A-11W-A071-09	TCGA-BH-A0E0-01A-11D-A128-09	DO1384	#N/A	#N/A
fb9135d9-2acf-41dd-8552-359e6b8c9470	e92dbac6-de3f-4a2d-aef0-778141b2d719	TCGA-BH-A18U-01A-21D-A12B-09	TCGA-BH-A18U-01A-21D-A19H-09	DO5200	#N/A	#N/A
2c6f1862-bb82-4e7e-9cb3-338bdf022ff4	a6463c16-5a16-4093-920b-141f4919caa0	TCGA-A8-A08S-01A-11W-A050-09	TCGA-A8-A08S-01A-11D-A19H-09	DO3140	#N/A	#N/A
6dbc5c31-043b-40e9-bf1a-e7b4ec351b4d	44a62781-ba16-4504-9f03-035806762e68	TCGA-A8-A09X-01A-11W-A019-09	TCGA-A8-A09X-01A-11D-A19H-09	DO2647	#N/A	#N/A
47312f61-5ef4-4f25-9320-8fbb4758790e	1dd9237b-4362-4c27-b9c9-96c293962bc2	TCGA-E2-A1LL-01A-11D-A142-09	TCGA-E2-A1LL-01A-11D-A142-09	DO2694	#N/A	#N/A
f9f04e42-63a2-4ee1-ade4-9e5bb5c20cdd	0d0d31c6-42d7-4ee3-8648-b24a690ff76a	TCGA-A2-A3KC-01A-11D-A20S-09	TCGA-A2-A3KC-01A-11D-A20S-09	#N/A	Missing from MC3 Public release	#N/A
71fda5a9-7049-406f-9348-2c24f7ddf5f4	cfc9e039-d3a0-4dd1-b3f0-9052e6492593	TCGA-A2-A0D0-01A-11W-A019-09	TCGA-A2-A0D0-01A-11D-A128-09	DO2995	#N/A	#N/A
e55f338f-97e2-4394-ae23-c92606069485	069ea347-fcd9-4f9f-9988-65e1d787e0b6	TCGA-EW-A1P8-01A-11D-A142-09	TCGA-EW-A1P8-01A-11D-A142-09	DO2842	#N/A	#N/A
cc4f9175-a8c8-424a-99d7-8bd11cae0e52	8058a53f-4355-4331-bc3d-963e61bf1eb4	TCGA-A8-A092-01A-11W-A019-09	TCGA-A8-A092-01A-11D-A19H-09	DO4796	#N/A	#N/A
13d05f7a-e16a-40ef-9a15-21257da2cf89	d6fffcf9-4cbf-4f51-a7e5-7f2db1284f47	TCGA-A2-A259-01A-11D-A16D-09	TCGA-A2-A259-01A-11D-A314-09	DO4719	#N/A	#N/A
d5372745-95cf-4572-a6e7-e7f5b796911a	01b1b227-54c5-4136-b964-2358fde8f4f3	TCGA-C8-A12L-01A-11D-A10Y-09	TCGA-C8-A12L-01A-11D-A19H-09	DO2055	#N/A	#N/A
aacaba97-ecde-440b-aae0-0e9c608c4b24	10d907cc-adb1-4e68-9d17-e3a4cc3c0d7f	TCGA-AO-A0JM-01A-21W-A071-09	TCGA-AO-A0JM-01A-21D-A19H-09	DO5626	#N/A	#N/A
25c76a8f-77c0-4650-bddf-45ed0c10a2e6	61e66746-f8af-4204-9edb-e4a1dd7c1e75	TCGA-AN-A04D-01A-21W-A050-09	TCGA-AN-A04D-01A-21D-A314-09	DO2222	#N/A	#N/A
1bb3a1c7-4d7b-4fb6-b54d-e94cbd0e32aa	441256a9-5c61-45b2-8aeb-18b28291c5de	TCGA-B6-A0RT-01A-21D-A099-09	TCGA-B6-A0RT-01A-21D-A128-09	DO5375	#N/A	#N/A
df291849-4c35-44e1-b013-8f6b7ee36113	4c8aa9d8-c35e-4b8b-bd54-87d2d779fb56	TCGA-EW-A1PH-01A-11D-A14K-09	TCGA-EW-A1PH-01A-11D-A17G-09	DO2551	#N/A	#N/A
c61ded54-f80e-4da8-b1d8-e22551c96118	6402dba2-81dc-4055-8a07-1fbbf41d5082	TCGA-B6-A0X5-01A-21D-A10G-09	TCGA-B6-A0X5-01A-21D-A314-09	DO2096	#N/A	#N/A
c67409b2-ac25-42a0-8543-4636ef132fe4	0851e8b0-013c-4899-bf46-4f56a8202df9	TCGA-A2-A3XX-01A-21D-A23C-09	TCGA-A2-A3XX-01A-21D-A23C-09	DO44103	#N/A	#N/A
6d7f44df-e9f0-4542-a6d8-d14ee7804002	ea1ad3b1-e789-459d-8ec4-ff982ee1e302	TCGA-E2-A15H-01A-11D-A12B-09	TCGA-E2-A15H-01A-11D-A19H-09	DO4473	#N/A	#N/A
a6c14ebc-81a2-44f7-af87-2b7ec85e5696	2daaf5e8-e018-4482-8eda-801f86d4bcd4	TCGA-A8-A07I-01A-11W-A019-09	TCGA-A8-A07I-01A-11D-A19H-09	DO2712	#N/A	#N/A
07b5141f-ac79-439b-883b-b0183bbe7ff5	a439780e-aeb5-407b-b9ab-c11b686e6ef3	TCGA-BH-A0BW-01A-11D-A10Y-09	TCGA-BH-A0BW-01A-11D-A10Y-09	DO3662	#N/A	#N/A
98bb3025-0637-4106-8621-12df7b5d662f	8988939c-77b8-4cb7-a89f-7f28c2bb9279	TCGA-EW-A1J5-01A-11D-A13L-09	TCGA-EW-A1J5-01A-11D-A13L-09	DO6144	#N/A	#N/A
2290b078-6a5b-4c83-9dfb-b525bbf14e4e	0e7a9da2-d62f-41a6-a9a9-286f820be1a7	TCGA-B6-A0I1-01A-11D-A21Q-09	TCGA-B6-A0I1-01A-11D-A21Q-09	DO4138	#N/A	#N/A
36d1a85e-a09b-4537-86e0-eaf1eb03aed8	6a337128-95dc-4db4-aa9d-fc7a0240c167	TCGA-A7-A26G-01A-21D-A167-09	TCGA-A7-A26G-01A-21D-A167-09	DO4359	#N/A	#N/A
15f90ef0-831b-40a3-98bd-ec226a9e8b26	76245e65-6927-4efc-9d2a-0923e97c25c1	TCGA-AR-A1AY-01A-21D-A12Q-09	TCGA-AR-A1AY-01A-21D-A12Q-09	DO2509	#N/A	#N/A
74039acd-5aca-4c65-818c-3b577d295be0	385f5b09-6e60-4b3c-8dc0-c3c5afb7cf9f	TCGA-E2-A14X-01A-11D-A10Y-09	TCGA-E2-A14X-01A-11D-A10Y-09	DO3874	#N/A	#N/A
b27d75ba-5989-4200-bfe9-f1b7d7cf8008	0c95a2d1-46ba-4dc5-afb0-b92e1b5b9367	TCGA-GM-A3XL-01A-11D-A22X-09	TCGA-GM-A3XL-01A-11D-A22X-09	DO44111	#N/A	#N/A
97064332-1d4f-4571-93ff-354ffe6d7df9	a5e841bf-6477-461c-a6b5-146e0a70ba78	TCGA-B6-A0RU-01A-11D-A099-09	TCGA-B6-A0RU-01A-11D-A12L-09	DO1954	#N/A	#N/A
8e03e773-5557-4e78-889b-4710c515378f	762912ab-bb80-4d18-8ab5-d77aa1793875	TCGA-AC-A2BK-01A-11D-A21Q-09	TCGA-AC-A2BK-01A-11D-A314-09	DO1328	#N/A	#N/A
41f140b8-72b9-4ae3-8b25-6144d9f94d0f	60dc0316-ac8e-48f1-a1f8-5281a3396a69	TCGA-A2-A04X-01A-21W-A050-09	TCGA-A2-A04X-01A-21D-A19H-09	DO5249	#N/A	#N/A
30dbe353-86d5-40ed-84c2-dbddf7beb17b	a3327d29-c91d-4cde-8bb2-20b7f131bb13	TCGA-BH-A0DT-01A-21D-A12B-09	TCGA-BH-A0DT-01A-21D-A12B-09	DO2503	#N/A	#N/A
2b000af3-2c9d-4eaa-af3f-8101b7425c37	b2b58c71-d6d0-4a8a-8a79-56c91385907a	TCGA-A2-A0D4-01A-11W-A019-09	TCGA-A2-A0D4-01A-11D-A314-09	DO5347	#N/A	#N/A
546b982f-60d9-43df-9761-09369afbee2d	41de0610-acb6-4440-8ac9-f53ba52276f8	TCGA-A1-A0SM-01A-11D-A099-09	TCGA-A1-A0SM-01A-11D-A19H-09	DO3037	#N/A	#N/A
6c8e9197-fd16-4fed-bfda-e349cab26314	c21f867f-fd73-4312-97ad-43b8368e3fa0	TCGA-A8-A075-01A-11D-A099-09	TCGA-A8-A075-01A-11D-A19H-09	DO4185	#N/A	#N/A
eddfbfb9-3ae8-449b-b870-46062a2571c1	6cb60673-4472-4005-ab9d-4b690caedbfd	TCGA-BH-A0WA-01A-11D-A10G-09	TCGA-BH-A0WA-01A-11D-A128-09	DO2897	#N/A	#N/A
9032b7fe-e38a-4641-a45e-67041668adc4	4828e324-f75d-4149-b826-613f947312d7	TCGA-BH-A0AV-01A-31D-A10Y-09	TCGA-BH-A0AV-01A-31D-A10Y-09	DO4635	#N/A	#N/A
418e916b-7a4e-4fab-8616-15dcec4d79f8	cd82154f-41e6-4c05-8b63-4ea4be794764	TCGA-A7-A13D-01A-13D-A272-09	TCGA-A7-A13D-01A-13D-A12Q-09	DO1392	#N/A	#N/A
9ddf2119-a222-4fa5-a9f3-0bec7eeea36b	961fb230-52e8-47de-9763-e79f185930cc	TCGA-EW-A1PB-01A-11D-A142-09	TCGA-EW-A1PB-01A-11D-A142-09	DO4695	#N/A	#N/A
fe04d042-a4cc-4a14-8197-415ea40951aa	12d72497-b821-45ba-9baf-3b0b3dcf4a53	TCGA-A8-A08L-01A-11W-A019-09	TCGA-A8-A08L-01A-11D-A19H-09	DO3110	#N/A	#N/A
27f87d1e-2c32-4beb-9677-62f7a286673d	252eb39d-8dd8-425f-862d-7f742839e513	TCGA-C8-A130-01A-31D-A10Y-09	TCGA-C8-A130-01A-31D-A19H-09	DO3804	#N/A	#N/A
f8f749b7-547d-49fa-9da2-44eed962b6fd	befb5097-3d5f-4046-9708-32ae79ca3a2e	TCGA-AO-A03N-01B-11D-A10M-09	TCGA-AO-A03N-01B-11D-A19H-09	DO5808	#N/A	#N/A
73936e8b-c893-4afd-bd1f-be90c06a4869	ce803dc3-1ad9-4668-8664-113431d3b924	TCGA-AN-A0G0-01A-11W-A050-09	TCGA-AN-A0G0-01A-11D-A045-09	DO2323	#N/A	#N/A
25e4cad7-2403-4992-9cbc-433574673549	4e56c077-5d68-4546-912c-0cd11dd4f231	TCGA-BH-A0H0-01A-11W-A071-09	TCGA-BH-A0H0-01A-11D-A314-09	DO2114	#N/A	#N/A
db45d81f-695c-4f99-beea-6dbec1ff47fc	141e90eb-9c25-4e3c-baef-132a9a3d6997	TCGA-A8-A094-01A-11W-A019-09	TCGA-A8-A094-01A-11D-A19H-09	DO2593	#N/A	#N/A
467ef778-f481-44f3-9768-b9900252d2ba	0e7b74ce-9620-4065-8730-c880a7e3f4ce	TCGA-AQ-A04J-01A-02W-A050-09	TCGA-AQ-A04J-01A-02D-A128-09	DO5312	#N/A	#N/A
7b08e810-f3c9-4155-ac11-f45a3a4f8b41	b6ae6b7d-dbbe-4d9d-aa85-f181c05a932f	TCGA-A7-A0CE-01A-11W-A019-09	TCGA-A7-A0CE-01A-11D-A12L-09	DO4080	#N/A	#N/A
5dbf3203-ce73-41e4-bf9a-32fc856f73f5	c8f28843-b2b2-4e59-ad3a-603506a709f2	TCGA-GI-A2C9-01A-11D-A21Q-09	TCGA-GI-A2C9-01A-11D-A21Q-09	#N/A	Missing from MC3 Public release	#N/A
6c65cb6d-8c50-4c7c-bc84-eeebe09fbe01	366e63e6-150e-4a20-8d29-cd6c314a28cb	TCGA-AR-A24Z-01A-11D-A167-09	TCGA-AR-A24Z-01A-11D-A314-09	DO1291	#N/A	#N/A
47b5d831-5287-4f62-b17a-6e5eff2e4184	1d955739-967c-4480-8d1b-2d46023d01c7	TCGA-B6-A0WX-01A-11D-A10G-09	TCGA-B6-A0WX-01A-11D-A10G-09	DO1537	#N/A	#N/A
8691c87f-2468-44bb-a670-3dccd6da33c6	e5b696ce-5ea6-41dc-9d28-7848db6362fc	TCGA-E2-A152-01A-11D-A12B-09	TCGA-E2-A152-01A-11D-A19H-09	DO4449	#N/A	#N/A
d8c6d4b8-f279-4edc-aaa3-a1cc266aec4d	9264bfbf-631b-4a42-8a2f-789544a21899	TCGA-C8-A12Q-01A-11D-A10Y-09	TCGA-C8-A12Q-01A-11D-A19H-09	DO3182	#N/A	#N/A
110b5f05-ded7-45ec-b0f6-a941c92d77dd	ca8bfbc8-54c6-47ac-bf79-3754f51329b0	TCGA-AO-A0J4-01A-11W-A050-09	TCGA-AO-A0J4-01A-11D-A128-09	DO1559	#N/A	#N/A
aa58c09a-7799-4675-8310-d270224b163e	e2548d6e-3d46-4994-aaa9-2d486e7b9cd3	TCGA-BH-A0H6-01A-21W-A071-09	TCGA-BH-A0H6-01A-21D-A314-09	DO2084	#N/A	#N/A
987528ac-437a-4eb8-a335-4f2076d5c006	def8488e-496d-4c33-b144-700df4b90387	TCGA-AO-A124-01A-11D-A10M-09	TCGA-AO-A124-01A-11D-A10M-09	DO1287	#N/A	#N/A
13c312ec-0add-4758-ab8d-c193e2e08c6d	4ab28e27-e860-4b3d-8abd-56b58930d2f6	TCGA-E9-A1NH-01A-11D-A14G-09	TCGA-E9-A1NH-01A-11D-A14G-09	DO1290	#N/A	#N/A
5b7d5767-2037-4175-aec9-886776343181	dfe911af-b135-49f4-9aab-d7c86b2d45c2	TCGA-A8-A07B-01A-11W-A019-09	TCGA-A8-A07B-01A-11D-A19H-09	DO2539	#N/A	#N/A
b752b444-f033-4be4-9d24-e5e80b4181af	0d11193b-2814-4eef-8b25-e9bee692c4ce	TCGA-A2-A04T-01A-21W-A050-09	TCGA-A2-A04T-01A-21D-A128-09	DO5696	#N/A	#N/A
5a535c49-d42e-43c6-9d32-dc76f28d4f0f	14db919b-cda8-430a-a9b3-cd3ec72f6e43	TCGA-AO-A12H-01A-11D-A10Y-09	TCGA-AO-A12H-01A-11D-A10Y-09	DO3158	#N/A	#N/A
84c77098-03d0-4b22-afb1-797703e85c6c	ff2d3372-26f4-408a-ae26-14ce9154f1a3	TCGA-BH-A1FC-01A-11D-A13L-09	TCGA-BH-A1FC-01A-11D-A13L-09	DO5661	#N/A	#N/A
4d409156-3a36-4c63-9ad6-b6af34f27b06	21b94ccd-b11b-486d-9e81-a4e81d5d007a	TCGA-A2-A0YG-01A-21D-A10G-09	TCGA-A2-A0YG-01A-21D-A19H-09	DO4036	#N/A	#N/A
ddc7377d-82c3-480a-be3c-3d1da52c77d4	b42eb179-20ae-45b7-9d20-1044b1614299	TCGA-AR-A0TX-01A-11D-A099-09	TCGA-AR-A0TX-01A-11D-A19H-09	DO1663	#N/A	#N/A
a85cf239-ff51-46e7-9b88-4c2cb49c66b9	61daec1f-61ad-4802-a4b1-77377f4a79ce	TCGA-A2-A04P-01A-31D-A128-09	TCGA-A2-A04P-01A-31D-A128-09	DO4963	#N/A	#N/A
207f8a42-5b05-4876-b0ae-ebfaeea27844	0d925835-05bf-4a58-9dc6-ef4d628c2e75	TCGA-AO-A0J2-01A-11W-A050-09	TCGA-AO-A0J2-01A-11D-A19H-09	DO2252	#N/A	#N/A
ea43434b-197e-48ac-ae2e-46bc7f3776de	82ea425f-4c19-40b2-99e5-84b4ec6e944c	TCGA-AR-A256-01A-11D-A167-09	TCGA-AR-A256-01A-11D-A167-09	DO4155	#N/A	#N/A
01658141-8398-4585-9f0f-8355dd9b0604	570bd9ba-0a92-4d49-a645-88bc9366f747	TCGA-A2-A0EY-01A-11W-A050-09	TCGA-A2-A0EY-01A-11D-A19H-09	DO3614	#N/A	#N/A
7456abd5-303e-4e6f-bf4e-47efefc7310f	80f7255d-09c6-4abf-94a2-8eac1043178e	TCGA-GM-A2DF-01A-11D-A17W-09	TCGA-GM-A2DF-01A-11D-A17W-09	DO3840	#N/A	#N/A
f6114c69-71a1-47d5-9b28-b0227b1872f7	0871ef1c-34d3-4c10-afcc-657c6e2a15dc	TCGA-A8-A08B-01A-11W-A019-09	TCGA-A8-A08B-01A-11D-A19H-09	DO5012	#N/A	#N/A
0448206f-3ade-4087-b1a9-4fb2d14e1367	084e9716-953e-4a00-a147-e84c2fd6f7fe	TCGA-EW-A3U0-01A-11D-A228-09	TCGA-EW-A3U0-01A-11D-A228-09	#N/A	Missing from MC3 Public release	#N/A
74b57d2c-a83f-4798-b86b-a533975e4cc0	aba36687-3f66-483d-8ea6-6b71ac835ae5	TCGA-E2-A14P-01A-31D-A12B-09	TCGA-E2-A14P-01A-31D-A19H-09	DO2455	#N/A	#N/A
f69e5057-eda6-4391-ba9a-aedbf6b572da	1e031cee-75fc-4d6d-9cbf-b46f206a6e4e	TCGA-AO-A0J6-01A-11W-A050-09	TCGA-AO-A0J6-01A-11D-A128-09	DO4233	#N/A	#N/A
6e839eaf-1dbb-43f5-8846-c980e05540c7	4fad0468-9431-4a17-9c6c-c09272bb7736	TCGA-A2-A25B-01A-11D-A167-09	TCGA-A2-A25B-01A-11D-A167-09	DO2706	#N/A	#N/A
7cdbe0e8-f614-4f54-b864-fd6b39e8ef1c	36a85c8c-dc64-47d3-a4d2-b59115a7fa23	TCGA-E2-A1LG-01A-21D-A14K-09	TCGA-E2-A1LG-01A-21D-A14K-09	DO4018	#N/A	#N/A
2da2b745-068d-408c-9163-3b3a78d4aaed	3fd01181-9497-4d00-9038-2a7e550a8e53	TCGA-E2-A156-01A-11D-A12B-09	TCGA-E2-A156-01A-11D-A314-09	DO5046	#N/A	#N/A
3585e133-b3c1-4d90-b5f2-2b867e0ae0ec	939a8f57-8f67-4b82-83c3-1620214cac76	TCGA-E2-A109-01A-11D-A10M-09	TCGA-E2-A109-01A-11D-A10M-09	DO4766	#N/A	#N/A
1c0e384f-7254-4afe-93c0-b3fc6c6a7894	433c4034-6333-4e88-bdde-e4ec7d5c80fb	TCGA-EW-A1PC-01B-11D-A21Q-09	TCGA-EW-A1PC-01B-11D-A21Q-09	#N/A	Missing from MC3 Public release	#N/A
e7dc7492-3a84-49c7-8dea-8f508b53dc40	71f3dc32-7ef6-4132-a7ff-ac00b83dd01c	TCGA-AN-A0XR-01A-11D-A10G-09	TCGA-AN-A0XR-01A-11D-A10G-09	DO3412	#N/A	#N/A
9c70688d-6e43-4520-9262-eaae4e4d597d	d46c8cb6-02c4-441a-918d-bf2ff7ba238d	TCGA-BH-A18R-01A-11D-A12B-09	TCGA-BH-A18R-01A-11D-A19H-09	DO2078	#N/A	#N/A
9ff21093-58d7-4b69-aade-c242a383ea56	9f382e7e-e421-4374-9e7d-247c56419612	TCGA-EK-A2R9-01A-11D-A18J-09	TCGA-EK-A2R9-01A-11D-A34H-09	DO51600	#N/A	#N/A
3269608c-5dd7-452a-976a-31ac971aac2f	d4ae572e-cd20-47ff-9486-12d966179b84	TCGA-C5-A2LV-01A-11D-A18J-09	TCGA-C5-A2LV-01A-11D-A18J-09	DO48987	#N/A	#N/A
b3b3a27c-ee9a-42af-a6d1-9af5970a98b9	894bf8a1-797e-4c7b-a909-a3ebce5cfbba	TCGA-EK-A2PK-01A-11D-A18J-09	TCGA-EK-A2PK-01A-11D-A18J-09	DO48977	#N/A	#N/A
07d20658-3db4-47e7-877b-66536266edfc	e16225ac-3b5d-4213-804c-0ac0f61059fb	TCGA-C5-A1M8-01A-21D-A13W-08	TCGA-C5-A1M8-01A-21D-A200-09	DO48993	#N/A	#N/A
945e6808-2887-4f32-ac32-8f9e00353bf6	9f3615b6-bfc9-444e-949d-6af0360ef5f5	TCGA-C5-A0TN-01A-21D-A14W-08	TCGA-C5-A0TN-01A-21D-A200-09	DO44285	#N/A	#N/A
7dc3e035-c7ae-4164-a62b-9c2460812b05	3973c1ac-7275-42bb-8190-0eb1c2541eb2	TCGA-C5-A1BF-01B-11D-A13W-08	TCGA-C5-A1BF-01B-11D-A200-09	DO48991	#N/A	#N/A
f658c350-fb89-4268-8a59-a07e365f4221	1a7599c9-7b5b-44c4-a754-c2fce51c6454	TCGA-C5-A1ML-01A-11D-A14W-08	TCGA-C5-A1ML-01A-11D-A200-09	DO51592	#N/A	#N/A
842df341-d34f-4ed6-928c-eaf15bf7f667	3d3bac7f-7ce8-46b9-a8b7-20671c5bc00e	TCGA-EK-A2RL-01A-11D-A18J-09	TCGA-EK-A2RL-01A-11D-A34H-09	DO49954	#N/A	#N/A
7bc3209f-b349-49bf-9b3d-44ef870b586f	ee1a8473-ac67-4277-a3c8-b2c289e87add	TCGA-EX-A1H5-01A-31D-A13W-08	TCGA-EX-A1H5-01A-31D-A34H-09	DO6255	#N/A	#N/A
43be43cb-a367-4a74-94e4-973acafcf576	14ce73d1-8ee4-404d-9983-259b98e5299c	TCGA-C5-A1BJ-01A-11D-A13W-08	TCGA-C5-A1BJ-01A-11D-A200-09	DO49009	#N/A	#N/A
8be2b0f5-7bad-4720-b13c-e95b32bdb933	6966e691-4542-423f-960f-7a4f813e8b00	TCGA-DG-A2KJ-01A-11D-A18J-09	TCGA-DG-A2KJ-01A-11D-A18J-09	DO51594	#N/A	#N/A
06dad93a-4b67-49b3-8fa5-f2546e22bae7	498a9915-0cb8-4c32-8f1a-4f35d6277b7b	TCGA-C5-A1BN-01B-11D-A14W-08	TCGA-C5-A1BN-01B-11D-A200-09	DO6252	#N/A	#N/A
14b8bbf2-310b-459b-b52d-a7ef510ce1cf	055f0c90-eb89-4f97-8317-616a4b0a30a4	TCGA-C5-A1MI-01A-11D-A14W-08	TCGA-C5-A1MI-01A-11D-A200-09	DO6249	#N/A	#N/A
0d31a44f-1fc5-43a2-9633-36c4e650d3d2	dfa72bd1-c27a-4fc3-880c-6c1bb6050772	TCGA-EK-A2RE-01A-11D-A18J-09	TCGA-EK-A2RE-01A-11D-A34H-09	DO49948	#N/A	#N/A
b9d1a64e-d445-4174-a5b4-76dd6ea69419	336fd4e9-b508-4ea2-a08e-2090206471c2	TCGA-C5-A1M9-01A-11D-A13W-08	TCGA-C5-A1M9-01A-11D-A200-09	DO49014	#N/A	#N/A
801e67c8-c506-410a-bdf0-856a66e974f4	74b11026-0f7e-431b-904c-580afe493093	TCGA-EK-A2RM-01A-21D-A18J-09	TCGA-EK-A2RM-01A-21D-A18J-09	DO49956	#N/A	#N/A
e07991a4-0901-4ed1-8704-aa376565d862	58b2d924-a81c-4353-be12-8590bcbfbab3	TCGA-DS-A0VL-01A-21D-A10S-08	TCGA-DS-A0VL-01A-21D-A200-09	DO6332	#N/A	#N/A
047f9e4d-86b5-4943-aef5-68199bf29e8c	ce5b48ae-794c-4951-8300-fa39b4bf73d5	TCGA-C5-A2LY-01A-31D-A18J-09	TCGA-C5-A2LY-01A-31D-A18J-09	DO6314	#N/A	#N/A
a67f4531-99ef-43df-82f5-f6abc4b11826	d279cb92-9848-44b5-89b1-377667a8b6e6	TCGA-C5-A1MQ-01A-11D-A14W-08	TCGA-C5-A1MQ-01A-11D-A200-09	DO49001	#N/A	#N/A
0f6b355e-3898-4be6-be97-da0c3840a4ed	ea50ef87-ad0f-4f36-a596-ebfc9f2fd99a	TCGA-C5-A2LT-01A-11D-A18J-09	TCGA-C5-A2LT-01A-11D-A18J-09	DO49880	#N/A	#N/A
31f02f48-44a4-445e-ac3d-e9bf3d8d25a2	2d0a6648-de04-4bec-acb3-4a59a9467c7e	TCGA-AA-A01V-01A-23W-A096-10	TCGA-AA-A01V-01A-23D-A17O-10	DO7822	#N/A	#N/A
2df02f2b-9f1c-4249-b3b4-b03079cd97d9	1faef5f6-f609-4bb0-a78f-fc47569837c8	TCGA-CA-6717-01A-11D-1835-10	TCGA-CA-6717-01A-11D-1835-10	DO8264	#N/A	#N/A
18dd42d7-2d84-400e-9adb-a38faa916a9e	8091a103-3cc7-425f-b322-069124bde7b6	TCGA-AA-A03F-01A-11W-A096-10	TCGA-AA-A03F-01A-11D-A17O-10	DO10558	#N/A	Missing from representative MAF (2583) syn:syn7364924
b7f2e85a-3c6a-48b7-8a4f-2dec1d85359d	fa2c0637-0eec-4cbb-bf65-21aad753e19b	TCGA-AA-A01X-01A-21W-A096-10	TCGA-AA-A01X-01A-21D-A17O-10	DO8004	#N/A	#N/A
10ad692b-4c3d-42de-9b5e-4968441388b3	37dcc7b8-541b-46db-921b-3b89c0dcc1c5	TCGA-QG-A5YX-01A-11D-A28G-10	TCGA-QG-A5YX-01A-11D-A28G-10	DO44093	#N/A	#N/A
93ff786e-0165-4b02-8d27-806d422e93fc	f7b32e59-94f8-4580-8151-0f4d89007b60	TCGA-AA-3977-01A-01W-0995-10	TCGA-AA-3977-01A-01D-1024-10	DO8730	#N/A	#N/A
8a929c55-35a6-4645-bb70-4b85d281b139	f5eb8f64-24df-4822-aab7-ce3b92a866d2	TCGA-NH-A50T-01A-11D-A28G-10	TCGA-NH-A50T-01A-11D-A28G-10	DO44086	#N/A	#N/A
f38b5d2e-5cab-45c7-bb0a-38b2efc5c156	a5ec2ada-3620-4890-b849-c60be187ca70	TCGA-A6-3807-01A-01W-0995-10	TCGA-A6-3807-01A-01D-1459-10	DO9034	#N/A	#N/A
00aa769d-622c-433e-8a8a-63fb5c41ea42	6d94679b-8157-4a76-b92f-1b86e9c11b41	TCGA-A6-6141-01A-11D-1771-10	TCGA-A6-6141-01A-11D-1771-10	#N/A	Missing from MC3 Public release	#N/A
42d20028-0ddc-4dac-9f05-d674f8915f21	33661a09-fce3-457a-866b-c742d3e639eb	TCGA-AD-6964-01A-11D-1924-10	TCGA-AD-6964-01A-11D-1924-10	DO8360	#N/A	#N/A
711c8a16-3cf8-42d8-b29e-fd1e9ef1c82b	963837ad-eed4-43e6-a282-8a4041080096	TCGA-AD-A5EJ-01A-11D-A28G-10	TCGA-AD-A5EJ-01A-11D-A28G-10	DO50090	#N/A	Missing from representative MAF (2583) syn:syn7364925
4019c219-c51e-479f-8a9d-cfa6816ed696	7f4adc3a-49c7-437c-ad4b-d0299e679b07	TCGA-AA-A02O-01A-21W-A096-10	TCGA-AA-A02O-01A-21D-A17O-10	DO9226	#N/A	#N/A
d3d65db3-36f9-41c7-8e5e-1683ce94dfcb	a962e049-ef62-44ac-9f39-33c701855d4d	TCGA-A6-A56B-01A-31D-A28G-10	TCGA-A6-A56B-01A-31D-A28G-10	DO44095	#N/A	#N/A
d9690a27-bb02-498e-b15c-ee76e31d16ee	f7a461ee-2562-456b-8205-150286b66550	TCGA-AA-3994-01A-01W-1073-09	TCGA-AA-3994-01A-01D-1981-10	DO8658	#N/A	#N/A
492b4e58-12e2-47b2-bd47-28f8607072fa	b7f8a59c-dcd6-4dff-ac21-f14380f255ca	TCGA-A6-A566-01A-11D-A28G-10	TCGA-A6-A566-01A-11D-A28G-10	DO44092	#N/A	#N/A
3c019b2f-52ec-40a8-99b5-98c1423ce627	d9dc9b17-c298-4d82-bd92-1d758cd48ffb	TCGA-AA-3956-01A-02W-0995-10	TCGA-AA-3956-01A-02D-1981-10	DO9700	#N/A	#N/A
d3daf373-1485-455e-a0a1-8e33d215d623	04914450-1789-438a-884c-9edbecd806a1	TCGA-A6-2681-01A-01D-1408-10	TCGA-A6-2681-01A-01D-1554-10	DO9788	#N/A	#N/A
31e63f89-a6a9-40fb-823d-f41587bd73d8	fa6a30e5-8866-49e8-b829-40ad67a7e519	TCGA-QG-A5Z2-01A-11D-A28G-10	TCGA-QG-A5Z2-01A-11D-A28G-10	DO44096	#N/A	Missing from representative MAF (2583) syn:syn7364926
a64000df-16e5-4b88-865f-5c680adf60eb	e6d4a69e-f4d8-49ef-a653-8370b4dd7e28	TCGA-AA-A01S-01A-21W-A096-10	TCGA-AA-A01S-01A-21D-A17O-10	DO9106	#N/A	#N/A
05486349-24a4-4931-bf5f-c9fefe369af2	bc46ad84-df09-4891-85f3-a195523ddfea	TCGA-A6-A567-01A-31D-A28G-10	TCGA-A6-A567-01A-31D-A28G-10	DO44087	#N/A	#N/A
303abbe5-4155-4a0d-bc3b-f8995261ca52	1ebe7041-c0b2-4366-a809-49d01b451b43	TCGA-AA-A01R-01A-21D-A17O-10	TCGA-AA-A01R-01A-21D-A17O-10	DO7934	#N/A	Missing from representative MAF (2583) syn:syn7364927
d3aff5d3-23c0-43ae-9c01-8ddd776b530b	4dc6d04a-722d-4c01-9c87-db46211096ae	TCGA-QG-A5Z1-01A-11D-A28G-10	TCGA-QG-A5Z1-01A-11D-A28G-10	DO51731	#N/A	Missing from representative MAF (2583) syn:syn7364928
4cfb0aee-6661-478a-8694-9d8ba15e46b7	544a2ba0-9057-4f98-bf3a-88551340cd6d	TCGA-QG-A5YW-01A-11D-A28G-10	TCGA-QG-A5YW-01A-11D-A28G-10	DO219106	#N/A	#N/A
b6b6e1d3-c592-4836-bdad-d53af2dbcc9a	51ccba3f-b73d-430e-b31f-defcb6ba45d7	TCGA-AA-3664-01A-01W-0900-09	TCGA-AA-3664-01A-01D-1981-10	DO7831	#N/A	#N/A
b2afbcba-d67d-43f1-be3b-05f3a5836ec0	8d9ae472-0744-4b9c-bc5d-452f0807a1dc	TCGA-AA-A02Y-01A-43W-A096-10	TCGA-AA-A02Y-01A-43D-A17O-10	DO7858	#N/A	#N/A
6051f40a-99e5-4461-9255-0e70d757b4d5	79395fb6-9713-41b0-a869-b80c34fabeac	TCGA-AA-3666-01A-02W-0900-09	TCGA-AA-3666-01A-02D-1981-10	DO9042	#N/A	#N/A
ec43c4b5-fb72-4a4a-af03-10c2d05ff159	ff3e522d-9178-487e-b749-9b8ea5255040	TCGA-D5-6540-01A-11D-1719-10	TCGA-D5-6540-01A-11D-1719-10	DO9708	#N/A	Missing from representative MAF (2583) syn:syn7364929
2182ce2c-5941-4b65-9419-fc7966d5e6d5	32260945-a63b-42cc-84e7-74ce52fb8d0c	TCGA-A6-6781-01A-22D-A270-10	TCGA-A6-6781-01A-22D-1924-10	DO8447	#N/A	Missing from representative MAF (2583) syn:syn7364930
9e5f0a23-e184-4611-b42b-e882dcf23acd	422ce271-8e52-4778-9786-8de2d68ca58e	TCGA-AA-3529-01A-02D-1953-10	TCGA-AA-3529-01A-02D-1554-10	DO9732	#N/A	#N/A
e3ef5cad-4d6e-4f04-babb-a908ee02644b	3f5d9aaf-83cd-4923-983f-142300bd606d	TCGA-QG-A5YV-01A-11D-A28G-10	TCGA-QG-A5YV-01A-11D-A28G-10	DO44088	#N/A	#N/A
55345803-83d4-4fdb-b0ee-328753801da1	fac7e650-96f6-40f0-949b-0b94f54b3c55	TCGA-NH-A50V-01A-11D-A28G-10	TCGA-NH-A50V-01A-11D-A28G-10	DO44094	#N/A	#N/A
080ecc31-756a-4a1b-a51e-d632ac8219f7	de0c8628-5c46-483d-946a-aad42e6dcfe9	TCGA-AY-A54L-01A-11D-A28G-10	TCGA-AY-A54L-01A-11D-A28G-10	DO44091	#N/A	#N/A
85e29049-a5e8-49fa-a576-e113c7b2c2e3	9a94001c-cb54-45b9-847b-dd047ea32040	TCGA-AA-3685-01A-02W-0900-09	TCGA-AA-3685-01A-02D-1981-10	DO8047	#N/A	#N/A
63bc376e-5a3d-44fd-8d77-686dfc41e458	3c7ae69f-7ec4-47bf-94dc-956c9611c33f	TCGA-A6-A565-01A-31D-A28G-10	TCGA-A6-A565-01A-31D-A28G-10	DO44090	#N/A	#N/A
a0f94565-9169-49ee-8e6a-21bdc43d9de6	4d73c43c-2069-4a30-9780-d92b9f1e81b6	TCGA-AA-3514-01A-02D-1953-10	TCGA-AA-3514-01A-02D-1554-10	DO10486	#N/A	#N/A
a9d1b074-7f36-4a04-b270-a2061249ff20	0150dca9-5588-43c8-bf7f-39979e393091	TCGA-AZ-4315-01A-01D-1408-10	TCGA-AZ-4315-01A-01W-1461-10	DO8842	#N/A	Missing from representative MAF (2583) syn:syn7364931
66701395-5a53-41bb-866b-3bbf08bc33ab	42fae444-01f4-4a40-9d5c-1e26e65aedf9	TCGA-AA-3534-01A-01D-1953-10	TCGA-AA-3534-01A-01D-1525-10	DO9940	#N/A	#N/A
0980e7fd-051d-45e9-9ca6-2baf073da4e8	d4f03676-8fe7-493a-8eb7-71c5ffaf2e13	TCGA-CA-6718-01A-11D-1835-10	TCGA-CA-6718-01A-11D-1835-10	DO7801	#N/A	#N/A
6ca5c1bb-275b-4d05-948a-3c6c7d03fab9	dfea8a76-e078-4727-8d3f-e3e605513ea6	TCGA-AA-A00N-01A-02D-A17O-10	TCGA-AA-A00N-01A-02D-A17O-10	DO9876	#N/A	#N/A
d0a0d845-32e2-4590-b909-29bd27b92900	2e171589-3464-4baf-ae82-6c69dddf972f	TCGA-AD-A5EK-01A-11D-A28G-10	TCGA-AD-A5EK-01A-11D-A28G-10	DO44089	#N/A	#N/A
75ad15b9-8f9c-40c1-9ca6-1e8454fbd310	3b5afae4-81a1-4763-9707-59fc6e85028b	TCGA-AA-A01T-01A-21W-A096-10	TCGA-AA-A01T-01A-21D-A17O-10	DO10631	#N/A	#N/A
fc453f67-6623-4e8c-b519-0bd79e4d4651	99140fb0-0927-46b9-9468-417d2cf4c9fe	TCGA-A6-2683-01A-01D-1953-10	TCGA-A6-2683-01A-01D-1554-10	DO7990	#N/A	#N/A
bd403458-5154-488b-931a-a7e737a6bf8c	23cc4691-e1ba-4728-a872-f0dfa548a50a	TCGA-FF-8062-01A-11D-2210-10	TCGA-FF-8062-01A-11D-2210-10	#N/A	Missing from MC3 Public release	#N/A
fa676301-902f-473f-8313-5bff34ae549a	87798cfb-a0a2-4441-b0fe-f5578f4c69d1	TCGA-FF-8041-01A-11D-2210-10	TCGA-FF-8041-01A-11D-2210-10	DO222305	#N/A	#N/A
aa847c3d-d3a7-46aa-a81b-db5099a458fb	7761117f-c42c-4b70-ad91-227254650a2a	TCGA-FF-8046-01A-11D-2210-10	TCGA-FF-8046-01A-11D-2210-10	DO222303	#N/A	#N/A
e89e9c69-ffcd-4a4c-818d-1dee43ddc76a	2e74d1e4-3632-4859-8d1b-fd112fbe837c	TCGA-FF-8043-01A-11D-2210-10	TCGA-FF-8043-01A-11D-2210-10	DO222308	#N/A	#N/A
a29278af-7ecf-403e-b6a9-623ea7879d05	8c7ed3bb-b561-48d9-806d-fc7eb9605d95	TCGA-FF-8061-01A-11D-2210-10	TCGA-FF-8061-01A-11D-2210-10	DO222307	#N/A	#N/A
897a4500-6fb8-4e81-aa07-021a26d632fb	0ea907e7-be31-4bd9-ba29-a4c0411ee3ba	TCGA-FF-8042-01A-11D-2210-10	TCGA-FF-8042-01A-11D-2210-10	DO222306	#N/A	#N/A
1b1780d5-06da-40ee-9e15-02631a68027b	598f314d-05bc-4fee-a968-03c4900be8ac	TCGA-FF-8047-01A-11D-2210-10	TCGA-FF-8047-01A-11D-2210-10	DO222304	#N/A	#N/A
7cae6c0b-36fe-411b-bbba-093a4c846d84	08de56dc-ad4d-4e5b-900f-2b46660d89e5	TCGA-14-1034-02B-01D-2280-08	TCGA-14-1034-02B-01D-2280-08	DO11148	#N/A	#N/A
39520be3-a2af-4189-acf4-9d239363333a	61bfc776-7998-40e5-8bc9-71aa2130e562	TCGA-06-0171-02A-11D-2280-08	TCGA-06-0171-02A-11D-2280-08	DO11382	#N/A	#N/A
b2d17671-d2e1-4c97-8b01-a976d5abe1d6	586fe68a-6de3-40e5-b803-5ab2706941a8	TCGA-06-0221-02A-11D-2280-08	TCGA-06-0221-02A-11D-2280-08	DO13971	#N/A	#N/A
96ef40c3-8d4c-4fe1-a33a-99f5b205a0bb	0f2a74be-63bf-4621-b4eb-a53dd7e35021	TCGA-14-0786-01B-01D-1492-08	TCGA-14-0786-01B-01D-0932-09	DO10900	#N/A	#N/A
d1132127-1250-43af-9c16-425798a3d1a7	0837be34-1050-4f6a-9a42-900395de1fa6	TCGA-26-5132-01A-01D-1486-08	TCGA-26-5132-01A-01D-1486-08	DO13474	#N/A	#N/A
a8f86b64-914c-4d89-897b-33bcdd1759f7	46263d6e-ad9a-4ad7-81d8-1d09fee130ad	TCGA-19-2624-01A-01D-1495-08	TCGA-19-2624-01A-01D-1495-08	DO14049	#N/A	#N/A
ece0f3a4-a204-4c52-bb1f-88d44a875b2e	8540f870-72f6-41ba-88f4-084b2eede8d0	TCGA-06-0145-01A-01D-1490-08	TCGA-06-0145-01A-01D-0507-08	DO13192	#N/A	#N/A
6de41ac1-229b-40b9-a494-5588c284351d	3a6e48f8-5a07-44c9-81c7-2b23211c9f2c	TCGA-19-2620-01A-01D-1495-08	TCGA-19-2620-01A-01D-1495-08	DO12952	#N/A	#N/A
41d50a3c-49fc-4d8a-9c25-bbbcd3a5da6f	adfa13db-cc83-4735-840a-cd3ee1f7027f	TCGA-06-0745-01A-01D-1492-08	TCGA-06-0745-01A-01D-1492-08	DO12034	#N/A	#N/A
2fdab641-d73b-4f9a-aa4c-c1944f131a69	16dd8ce1-d9f2-45d6-9645-c6b69f320604	TCGA-06-5411-01A-01D-1696-08	TCGA-06-5411-01A-01D-1696-08	DO12484	#N/A	#N/A
0332b017-17d5-4083-8fc4-9d6f8fdbbbde	067dcd9e-8ced-4c02-9a7a-c2c1686255d9	TCGA-02-2485-01A-01D-1494-08	TCGA-02-2485-01A-01D-1494-08	DO12742	#N/A	#N/A
914421d2-898e-433e-bb66-b1710eaae2c7	4785fa18-b1dd-4de2-bc10-eda619f1ba98	TCGA-06-0744-01A-01D-1492-08	TCGA-06-0744-01A-01D-1492-08	DO11860	#N/A	#N/A
3914c02e-44ad-4c96-8464-61aa95b42c49	feef9825-a5d7-44ff-9de7-e3682c192927	TCGA-06-0211-02A-02D-2280-08	TCGA-06-0211-02A-02D-2280-08	DO11794	#N/A	#N/A
2ce48f01-2f61-49d9-a56a-7438bf4a37d7	7e6c9614-5bcd-4800-bcbe-b6d50f8c8099	TCGA-26-5135-01A-01D-1486-08	TCGA-26-5135-01A-01D-1486-08	DO11447	#N/A	Missing from representative MAF (2583) syn:syn7364932
c27290e4-6835-448a-abdc-df8ddd5f4630	77cc28d2-77b2-40c8-a1d9-6d6df017c2a2	TCGA-06-2557-01A-01D-1494-08	TCGA-06-2557-01A-01D-1494-08	DO13318	#N/A	#N/A
65723119-bdfe-46f0-b629-c171023abd71	9b92a62d-545d-4c46-8773-b11f4f4777f1	TCGA-32-1970-01A-01D-1494-08	TCGA-32-1970-01A-01D-1494-08	DO13144	#N/A	#N/A
fca08ee9-b480-4dc7-be56-f1eb03b56f7c	68c9faee-c30c-4e5c-a786-a3868aeddac1	TCGA-06-5415-01A-01D-1486-08	TCGA-06-5415-01A-01D-1486-08	DO12454	#N/A	#N/A
d60f54f5-b154-42c4-99fb-cea4e7a33dc7	ac1d46d1-c4ca-48b7-9b22-26efca42c408	TCGA-27-2523-01A-01D-1494-08	TCGA-27-2523-01A-01D-1494-08	DO10908	#N/A	#N/A
c065761d-f775-457f-bda0-4c7c257a701e	0fe7a284-d848-45d0-9c59-4c251abf8605	TCGA-06-0190-02A-01D-2280-08	TCGA-06-0190-02A-01D-2280-08	DO10975	#N/A	#N/A
96e3db14-2bb1-4f68-aed6-5e794750c96e	e6c375f0-b029-456c-9db0-fa96a2ab56dd	TCGA-06-0125-02A-11D-2280-08	TCGA-06-0125-02A-11D-2280-08	DO13510	#N/A	#N/A
b8151614-b08f-49a3-ab6f-2e780f765a17	60f68e70-00f0-4b9a-bf73-0cb01ed4771a	TCGA-19-5960-01A-11D-1696-08	TCGA-19-5960-01A-11D-1696-08	DO12370	#N/A	#N/A
08ac57ec-0036-4134-a9bb-f22eaa27ab0d	91000519-ca30-4db9-a7f7-e5fea2a230d9	TCGA-06-0214-01A-02D-1491-08	TCGA-06-0214-01A-02D-1491-08	DO10960	#N/A	#N/A
4d7f2c74-862b-4aad-98e1-fa831f14a905	f5b3ce42-1c9f-4379-b8fa-5ea98a48a65d	TCGA-02-2483-01A-01D-1494-08	TCGA-02-2483-01A-01D-1494-08	DO12352	#N/A	#N/A
4a1ad661-f6ae-44e8-b50b-72ff658ff22b	bcd87f23-f02b-4df3-b879-76cfe1caf7bc	TCGA-14-1823-01A-01D-1494-08	TCGA-14-1823-01A-01D-1494-08	DO12070	#N/A	#N/A
53dec97d-0464-4ffd-8e2e-95b2b9a03af0	7f35f12c-8316-4f1d-bcc2-e72fd7cd4d1d	TCGA-14-2554-01A-01D-1494-08	TCGA-14-2554-01A-01D-1494-08	DO11202	#N/A	#N/A
04339769-517c-448d-a7ca-951f83608c60	f84c3c38-be0d-4a53-b31a-cfebd0754970	TCGA-06-2570-01A-01D-1495-08	TCGA-06-2570-01A-01D-1495-08	DO13575	#N/A	#N/A
374cbd87-428e-4509-85c1-b7d3302c30a0	0c21e934-ef0c-47be-944a-4fbaf8408f0b	TCGA-27-2528-01A-01D-1494-08	TCGA-27-2528-01A-01D-1494-08	DO11782	#N/A	#N/A
5fd77ba9-5015-4d8b-86a0-582e5c76bdd6	23fa5b40-d68c-4f8d-ac9a-321f6c2bc90c	TCGA-41-5651-01A-01D-1696-08	TCGA-41-5651-01A-01D-1696-08	DO11501	#N/A	#N/A
2c71d542-1653-4d97-8752-f2fd05c7e75d	9d755abc-05ca-478e-ab6c-26ff50d4bb4e	TCGA-06-0686-01A-01D-1492-08	TCGA-06-0686-01A-01D-1492-08	DO13348	#N/A	#N/A
b60392fb-43d9-4c9c-b91b-ded40492e61c	282fd15d-0ba9-4f4b-bff2-e855e998ec51	TCGA-06-0210-02A-01D-2280-08	TCGA-06-0210-02A-01D-2280-08	DO13869	#N/A	#N/A
56ffaa35-814c-4c0b-b3c6-d4514d34fec2	579db84e-a45f-4828-938f-1824eb98a5d3	TCGA-19-2629-01A-01D-1495-08	TCGA-19-2629-01A-01D-1495-08	DO11046	#N/A	#N/A
b1e62d8e-24d2-4118-8cd0-3142acebdd5b	6edcac85-e029-4f95-8003-1b1c1bd1e53d	TCGA-06-0157-01A-01D-1491-08	TCGA-06-0157-01A-01D-1491-08	DO12814	#N/A	#N/A
9880c3c9-5685-42a7-8fe9-7585ea1a1d37	b075dad5-2218-4408-a8d2-d0e7568c60b9	TCGA-27-1831-01A-01D-1494-08	TCGA-27-1831-01A-01D-1494-08	DO13132	#N/A	#N/A
841eb82b-347d-4d7f-805f-3f3701a2983d	ea7cc00e-b701-4926-802a-4268f8daf51c	TCGA-06-0152-02A-01D-2280-08	TCGA-06-0152-02A-01D-2280-08	DO11238	#N/A	Missing from representative MAF (2583) syn:syn7364933
eab71331-53d3-4cf5-96c9-5121a3962c27	2cdc77d5-cffd-4a40-ac7d-7a8ceb3bf79d	TCGA-06-0155-01B-01D-1492-08	TCGA-06-0155-01B-01D-0932-09	DO11292	#N/A	#N/A
a8041e86-071e-46cd-8fb5-7ecdc1ab0553	45fbeb27-4fa8-44fc-9cf6-08806de0ac19	TCGA-CV-7090-01A-11D-2012-08	TCGA-CV-7090-01A-11D-2276-10	DO14238	#N/A	#N/A
5193a482-6ed9-4504-bd7c-c8b9e4103577	ccf3466b-cb05-4245-adfa-e4efe5cd5d29	TCGA-CR-6472-01A-11D-1870-08	TCGA-CR-6472-01A-11D-2268-08	DO15870	#N/A	#N/A
d4b80307-abbd-48bb-b52c-6dcd409699a2	449986a2-7b82-46f1-9c6d-8fc0fb7689f8	TCGA-CV-5443-01A-01D-1512-08	TCGA-CV-5443-01A-01D-2268-08	DO15911	#N/A	#N/A
878a7fe7-20ff-4651-9587-b4d6fd42e929	5141bd88-7c73-43d7-b00b-01b0c164ac52	TCGA-CN-4737-01A-01D-1434-08	TCGA-CN-4737-01A-01D-2266-10	DO15110	#N/A	#N/A
46d35b82-e1b7-4d35-be5e-3a70fd47e421	a82ba0b9-c7c2-4d55-aa64-817fee47a0ec	TCGA-CV-5442-01A-01D-1512-08	TCGA-CV-5442-01A-01D-2266-10	DO14678	#N/A	#N/A
c76f7fcc-2748-4b6d-805e-d21652dd5e3a	ed445aad-d629-4b41-9395-363118028458	TCGA-BA-6872-01A-11D-1870-08	TCGA-BA-6872-01A-11D-A32X-10	DO14236	#N/A	#N/A
dfa20d2d-1ba3-476a-b4b9-21d21470bee2	864d72de-640f-4879-bb27-b6da35660c1f	TCGA-CV-6961-01A-21D-1912-08	TCGA-CV-6961-01A-21D-2268-08	DO14566	#N/A	#N/A
7158c9fd-a633-4fef-aa23-bd285f2a87a8	6cc6452f-76bb-4643-8329-a952d634d1ff	TCGA-CR-6482-01A-11D-1870-08	TCGA-CR-6482-01A-11D-2268-08	DO15943	#N/A	#N/A
a0fe80e0-e3ac-485b-8a1a-4c80c101b874	797ab4c4-3853-4666-853e-7adcc19c64b5	TCGA-CN-5365-01A-01D-1434-08	TCGA-CN-5365-01A-01D-2276-10	DO15022	#N/A	#N/A
1aff91a6-1b0f-4575-8f4b-4e064a50b886	7d11e7b5-b171-4548-b0a3-41c825fecec8	TCGA-CV-7255-01A-11D-2012-08	TCGA-CV-7255-01A-11D-2276-10	DO14718	#N/A	#N/A
d3709eea-ca2a-49ac-b79c-871a5473d450	c11c7586-8c13-4534-ae1c-f0f196f40b85	TCGA-DQ-5625-01A-01D-1870-08	TCGA-DQ-5625-01A-01D-A32X-10	DO15414	#N/A	#N/A
a315b798-f037-48d5-91ed-e733e3bbd6ee	ccd8ad4d-2be9-418e-92d6-93a038363ef0	TCGA-CR-6491-01A-11D-1870-08	TCGA-CR-6491-01A-11D-A32X-10	DO14192	#N/A	#N/A
190eb791-383d-4e27-870d-e470630843e7	2dd84439-4d32-456a-b866-27bed9dda920	TCGA-CN-6994-01A-11D-1912-08	TCGA-CN-6994-01A-11D-A32X-10	DO15398	#N/A	#N/A
8294a969-59a1-4d3b-895b-f07e96bf9f7a	405e3808-86ab-4daf-a404-d57eafd77278	TCGA-BA-5556-01A-01D-1512-08	TCGA-BA-5556-01A-01D-A32X-10	DO14232	#N/A	#N/A
e2b5c926-491d-430d-8d9c-5c73d7752d1b	f3db0b9d-d144-4845-88ee-54b9955a9893	TCGA-BA-4076-01A-01D-1434-08	TCGA-BA-4076-01A-01D-2266-10	DO14502	#N/A	#N/A
c121de15-78f7-4698-91bf-fd0485c466c2	37682e76-f9d4-41c2-91ee-3fda03e55d5d	TCGA-CR-7391-01A-11D-2012-08	TCGA-CR-7391-01A-11D-2334-08	DO15198	#N/A	#N/A
ee963667-56b1-49bd-8896-e07b536d3014	be178760-5e2e-4b73-bca6-e511903dd060	TCGA-CR-6467-01A-11D-1870-08	TCGA-CR-6467-01A-11D-2266-10	DO14942	#N/A	#N/A
5046f1b4-9d95-4841-ba30-691fa44719a2	157acb59-e5b4-435b-83c6-6bacb4f4921c	TCGA-CV-6956-01A-21D-2012-08	TCGA-CV-6956-01A-21D-A32X-10	DO15815	#N/A	#N/A
7e584ff6-0b81-4f85-81da-b8117afee326	d6c01778-91a2-4e07-9543-1bef67e21db0	TCGA-CV-5973-01A-11D-1683-08	TCGA-CV-5973-01A-11D-A32X-10	DO15014	#N/A	#N/A
feccc27e-5c2e-4339-8746-0945fee93c1e	d3cdbed5-b767-4930-83bc-b92cc2155a81	TCGA-CV-7100-01A-11D-2012-08	TCGA-CV-7100-01A-11D-2268-08	DO15503	#N/A	#N/A
1db83e80-bdf7-4d8d-8008-bd8406d641fc	1438ded5-e200-4645-8607-71128bc7bc21	TCGA-CR-6487-01A-11D-1870-08	TCGA-CR-6487-01A-11D-2268-08	DO15527	#N/A	#N/A
29fc38aa-f367-46a3-a14d-a5f657ad0caa	25322110-40a5-424c-8534-3e2179b1a626	TCGA-CR-5250-01A-01D-1512-08	TCGA-CR-5250-01A-01D-2276-10	DO16015	#N/A	#N/A
6bbd66dd-efee-4d6e-b02f-f88e98526b82	fa6793de-b90d-41e7-915a-1e58aff0c336	TCGA-CR-7385-01A-11D-2012-08	TCGA-CR-7385-01A-11D-2268-08	DO14282	#N/A	#N/A
e52ffa79-557a-4024-81f3-f3826c227ec5	fdbaffec-b252-40e3-8e87-990d2d896bee	TCGA-CX-7086-01A-11D-2078-08	TCGA-CX-7086-01A-11D-A32X-10	DO15046	#N/A	#N/A
ef673d3d-2031-4036-ba25-4bc7ef04075b	6592b984-96fc-4e38-97d3-05b4acf9c8bc	TCGA-CR-6480-01A-11D-1870-08	TCGA-CR-6480-01A-11D-2268-08	DO14296	#N/A	#N/A
b537bc07-9998-49f4-bbbe-5b617152bfd9	631007e8-3ff9-4769-9638-464f7552e2ca	TCGA-BA-A4IH-01A-11D-A25Y-08	TCGA-BA-A4IH-01A-11D-A25T-08	DO52029	#N/A	#N/A
dd67dec6-35dd-4efe-b913-ed4884855365	a33d3c19-fb72-4d8f-9e12-e726ad2e366a	TCGA-BA-6873-01A-11D-1870-08	TCGA-BA-6873-01A-11D-2266-10	DO14242	#N/A	#N/A
81598359-24d5-4a8b-a6e6-7a6f94289119	02581ba0-d5c8-4a16-ba12-70139b6a81ab	TCGA-BB-4225-01A-01D-1434-08	TCGA-BB-4225-01A-01D-2268-08	DO14264	#N/A	#N/A
c0812962-a345-48b7-aec0-01336c2d1eed	f177441e-bc27-4be3-93be-618b2431b045	TCGA-CR-5249-01A-01D-1512-08	TCGA-CR-5249-01A-01D-2276-10	DO14582	#N/A	#N/A
1fff8b62-534b-4d71-a65f-e5f93b8b50ed	5a512533-85fa-4120-ab4e-0f781b53ab68	TCGA-BA-5149-01A-01D-1512-08	TCGA-BA-5149-01A-01D-A32X-10	DO14862	#N/A	#N/A
02c6a893-49c5-49d1-8eb1-195021e70d52	0ecc64b4-9dff-4df0-aa21-00f934c8a967	TCGA-CR-6470-01A-11D-1870-08	TCGA-CR-6470-01A-11D-2334-08	DO14686	#N/A	#N/A
83eca7b5-45bb-44c0-8afe-36f8988d0078	220538a7-d79f-409e-9d95-748d9d6df519	TCGA-CR-7404-01A-11D-2129-08	TCGA-CR-7404-01A-11D-2334-08	DO14420	#N/A	#N/A
1727e88b-df0a-4af2-9191-8c6061d98ad0	2479f214-aa4e-4afa-af8d-9b9f3f705163	TCGA-CV-7180-01A-11D-2012-08	TCGA-CV-7180-01A-11D-2266-10	DO14742	#N/A	#N/A
0e6ca8dc-0f31-4675-95b1-5920576daeff	f7d84db9-fd8a-43bc-9fa4-ecb1952b1714	TCGA-CV-6433-01A-11D-1683-08	TCGA-CV-6433-01A-11D-2276-10	DO14204	#N/A	#N/A
ab923db7-54e8-4a50-b7fd-c2b4b300041e	917d2209-4167-4971-ac60-a4a0f4e7e24f	TCGA-CN-5374-01A-01D-1434-08	TCGA-CN-5374-01A-01D-2266-10	DO15430	#N/A	#N/A
9988eb07-01f6-4f83-8699-bb63e0525f08	ca674bf0-cf05-40e1-816a-0cfe60ff2dd5	TCGA-CV-5432-01A-02D-1683-08	TCGA-CV-5432-01A-02D-A32X-10	DO14343	#N/A	#N/A
c2124bb2-30e1-4093-9a8a-3a188a6dc0a9	ea4a0a10-aab7-4bc6-a7c3-d296773d9848	TCGA-CQ-6228-01A-11D-1912-08	TCGA-CQ-6228-01A-11D-A32X-10	DO14750	#N/A	#N/A
21205681-a0c7-48d0-81d4-0b7ef31158cf	ca610174-34ee-4dd1-96ae-66209785a1a8	TCGA-CN-6011-01A-11D-1683-08	TCGA-CN-6011-01A-11D-A32X-10	DO15791	#N/A	#N/A
54e78de0-d357-4125-a904-ab35e461572b	f337d15d-0a3c-453f-94c7-fb8385092326	TCGA-HD-7753-01A-11D-2078-08	TCGA-HD-7753-01A-11D-A32X-10	DO14614	#N/A	#N/A
d25a4c65-9cb4-4611-909e-e68f93408d84	47f096a7-9930-453d-bb2d-6a2eaa6d42a3	TCGA-CV-7432-01A-11D-2129-08	TCGA-CV-7432-01A-11D-A32X-10	DO14159	#N/A	Missing from representative MAF (2583) syn:syn7364934
b86e88e7-0d5f-4b32-a35f-dc97251ab990	20822214-ca8d-465d-88cf-72c64dfa1956	TCGA-CR-7382-01A-11D-2129-08	TCGA-CR-7382-01A-11D-A32X-10	DO14171	#N/A	#N/A
08227616-02a5-46e8-9db1-f2d1d691ab23	4e07c6b8-bdb5-4205-b291-1e83b0699470	TCGA-CN-6989-01A-11D-1912-08	TCGA-CN-6989-01A-11D-A32X-10	DO14814	#N/A	#N/A
3e604a1c-b95f-44ff-9723-e2fac845da3b	847bf88e-5683-47fe-9e0d-c6970b696f59	TCGA-BA-6869-01A-11D-1870-08	TCGA-BA-6869-01A-11D-A32X-10	DO14250	#N/A	#N/A
d72a7338-c144-4c62-a70e-2177a3b4b77e	66b7ee28-b583-4161-99fd-9d99b52de2d1	TCGA-KL-8327-01A-11D-2310-10	TCGA-KL-8327-01A-11D-2310-10	DO220335	#N/A	#N/A
c56505cb-e150-408d-9df6-3af4e608c376	85fe7986-ef40-4975-ab4b-e72f3528092d	TCGA-KL-8333-01A-11D-2310-10	TCGA-KL-8333-01A-11D-2310-10	DO220341	#N/A	#N/A
4729fe4b-c1ac-489b-a67e-91e5c5e3ff8c	654706f7-0b11-46dd-8bb3-17920d68799b	TCGA-KL-8326-01A-11D-2310-10	TCGA-KL-8326-01A-11D-2310-10	DO220334	#N/A	#N/A
93b51c61-6eea-4228-a102-840a2e118522	9c224648-0565-4876-bf83-ed76de476676	TCGA-KN-8431-01A-11D-2310-10	TCGA-KN-8431-01A-11D-2310-10	DO220509	#N/A	#N/A
8df1eeb4-dfc9-4a0a-8f93-98460c3ab489	11db9f58-5940-4312-8168-770cae67859f	TCGA-KO-8409-01A-11D-2310-10	TCGA-KO-8409-01A-11D-2310-10	DO220568	#N/A	Missing from representative MAF (2583) syn:syn7364935
0c7af04b-e171-47c4-8be5-5db33f20148e	adf256fe-046d-4e6b-b0c3-5d65afd3b5f7	TCGA-KO-8417-01A-11D-2310-10	TCGA-KO-8417-01A-11D-2310-10	DO220608	#N/A	Missing from representative MAF (2583) syn:syn7364936
9d29543e-8601-4fd0-8e76-3df3de465cab	1c904c36-4ffb-4d7b-ac58-1ec3d51a625a	TCGA-KO-8416-01A-11D-2310-10	TCGA-KO-8416-01A-11D-2310-10	DO220599	#N/A	Missing from representative MAF (2583) syn:syn7364937
09537dce-c797-4b60-962a-d4c3cd6ab00a	2de7bbec-f91e-4ec6-8582-37d29ec3eed8	TCGA-KL-8330-01A-11D-2310-10	TCGA-KL-8330-01A-11D-2310-10	DO220338	#N/A	#N/A
64f696a6-58b2-40a8-b848-fd775cd52529	350a254f-5433-4f5e-ad86-746cfb75f0f7	TCGA-KO-8407-01A-11D-2310-10	TCGA-KO-8407-01A-11D-2310-10	DO220556	#N/A	#N/A
148536ce-ee2a-4952-a19d-10d6f44146b9	86a1402a-9074-49db-86c8-f3b72be5fde6	TCGA-KM-8438-01A-11D-2310-10	TCGA-KM-8438-01A-11D-2310-10	DO220355	#N/A	#N/A
0b811c6a-8f05-44bd-ac33-fb720d189e71	055a1e54-d1af-4914-90a0-ef8f71aefaa7	TCGA-KM-8639-01A-11D-2397-10	TCGA-KM-8639-01A-11D-2397-10	DO220363	#N/A	#N/A
c00de7a0-0b09-4e07-988c-ef2a7f8e932a	d392dca7-44e7-4914-a465-eadccf197b32	TCGA-KM-8443-01A-11D-2310-10	TCGA-KM-8443-01A-11D-2310-10	DO220360	#N/A	#N/A
ba686386-8113-4885-b20f-6ad09a295604	378e6d6c-b5e9-4031-9b2e-c3d2f27e02d4	TCGA-KN-8421-01A-11D-2310-10	TCGA-KN-8421-01A-11D-2310-10	DO220439	#N/A	#N/A
d113ce88-04ab-4675-b363-92f80c28de34	f3e293ac-4502-49e8-84c9-814004e462a8	TCGA-KL-8340-01A-11D-2310-10	TCGA-KL-8340-01A-11D-2310-10	DO220348	#N/A	#N/A
58c7e9c3-1345-48c0-a758-0887358b8696	a81eaf75-bd04-4a3c-8fc4-a06afa751803	TCGA-KN-8429-01A-11D-2310-10	TCGA-KN-8429-01A-11D-2310-10	DO220490	#N/A	#N/A
c6d6f49e-6e95-4e41-8388-71f6fe017d80	7d7e4961-43ad-456c-b41f-be6e50ef570c	TCGA-KL-8332-01A-11D-2310-10	TCGA-KL-8332-01A-11D-2310-10	DO220340	#N/A	#N/A
9fb73d89-f7c4-47b2-810b-3ce37cd8a3c9	8b4334af-1cea-47b8-bb9b-fa6cb1291180	TCGA-KM-8442-01A-11D-2310-10	TCGA-KM-8442-01A-11D-2310-10	DO220359	#N/A	#N/A
2ccd028d-e7e0-4f77-a512-f658a31819a4	93a0548b-5960-45bd-b2b3-c2ef27cc0236	TCGA-KL-8328-01A-11D-2310-10	TCGA-KL-8328-01A-11D-2310-10	DO220336	#N/A	#N/A
322f0b01-2118-4dbe-aba1-3875a54ee71b	06716cb9-2238-40db-9cc1-309b5c3e2500	TCGA-KN-8428-01A-11D-2310-10	TCGA-KN-8428-01A-11D-2310-10	DO220484	#N/A	Missing from representative MAF (2583) syn:syn7364938
d648c804-4eaf-4252-8b6f-13378158a07d	c2c33b63-24b7-4363-9463-df362a8c4e72	TCGA-KN-8422-01A-11D-2310-10	TCGA-KN-8422-01A-11D-2310-10	DO220449	#N/A	#N/A
5bebc389-de0d-45b8-9d2f-6476988c358a	772d5a15-9f13-4dde-b2d0-eccb4b4f712d	TCGA-KM-8476-01A-11D-2310-10	TCGA-KM-8476-01A-11D-2310-10	DO220361	#N/A	#N/A
a3fd2ee0-3dd0-4992-9a9f-75e487b43441	df930301-e00f-436a-815a-c9d9c603b93c	TCGA-KL-8337-01A-11D-2310-10	TCGA-KL-8337-01A-11D-2310-10	DO220345	#N/A	Missing from representative MAF (2583) syn:syn7364939
9fc0e0e8-1b0f-400c-b4cf-126193283695	2476b5be-ae27-4a30-a82a-0a587b69c9e4	TCGA-KL-8325-01A-11D-2310-10	TCGA-KL-8325-01A-11D-2310-10	DO220333	#N/A	#N/A
e9032df3-8692-4146-a867-b9b64c9b310a	4b7f6a14-64a5-4664-a533-57bdcf3354ea	TCGA-KL-8341-01A-11D-2310-10	TCGA-KL-8341-01A-11D-2310-10	DO220349	#N/A	#N/A
9d3b0b87-5fc5-4d09-9c63-4d5fc4bc46d0	6b41d4c9-c3e9-4090-908a-f7b91ca11b58	TCGA-KM-8439-01A-11D-2310-10	TCGA-KM-8439-01A-11D-2310-10	DO220356	#N/A	#N/A
fae88d21-171c-4df4-b258-3c5948a1034b	05be0332-cdca-4887-aa88-3120a2b45cbe	TCGA-KL-8323-01A-21D-2310-10	TCGA-KL-8323-01A-21D-2310-10	DO220331	#N/A	#N/A
cdf313c8-59f9-41c6-9bd2-f47cb4287da5	856891e0-ac9c-4139-a46b-c6a6e7de3498	TCGA-KM-8440-01A-11D-2310-10	TCGA-KM-8440-01A-11D-2310-10	DO220357	#N/A	#N/A
7087a2b6-7fc4-45b0-8c48-248864f03deb	c40e4d9c-2a24-4ea1-9188-e1e608f9e3b7	TCGA-KL-8331-01A-11D-2310-10	TCGA-KL-8331-01A-11D-2310-10	DO220339	#N/A	#N/A
1e8ae8dd-74c1-44d5-a74e-bfdce801c736	5c416c6d-7239-4189-987b-6ab8f009977c	TCGA-KN-8424-01A-11D-2310-10	TCGA-KN-8424-01A-11D-2310-10	DO220468	#N/A	#N/A
07e0e938-f61f-477a-92a2-5b7e74b78943	a686ffb7-0933-41c3-b803-9eb8beacc56c	TCGA-KN-8427-01A-11D-2310-10	TCGA-KN-8427-01A-11D-2310-10	DO220479	#N/A	#N/A
4ecbfd89-393f-4126-aa1c-951a2c23ef89	ec8ace99-9445-4a94-af57-8d5aaf0c5d60	TCGA-KM-8477-01A-11D-2310-10	TCGA-KM-8477-01A-11D-2310-10	DO220362	#N/A	#N/A
c29f6ed6-880d-4f03-977e-1087738e5e60	bdf9cc4c-af86-498d-84b2-dc22c2d4b799	TCGA-KO-8406-01A-11D-2310-10	TCGA-KO-8406-01A-11D-2310-10	DO220554	#N/A	#N/A
94434272-4cbd-4b4d-bd98-44f18526dd69	a615f970-6887-4f20-82cd-5d9e6803d90b	TCGA-KL-8334-01A-11D-2310-10	TCGA-KL-8334-01A-11D-2310-10	DO220342	#N/A	#N/A
bd2ec47b-a120-4b3b-b10d-aee09805ab33	deba9705-e9a2-4cd2-95a1-0232b0dbf34e	TCGA-KL-8346-01A-11D-2310-10	TCGA-KL-8346-01A-11D-2310-10	DO220354	#N/A	#N/A
3ace181a-23bd-424e-a87e-e0c01a2a2cb8	655ee8a7-587f-4feb-8136-58fc3bdcc50a	TCGA-KL-8344-01A-11D-2310-10	TCGA-KL-8344-01A-11D-2310-10	DO220352	#N/A	#N/A
85ed2434-da94-4333-90ca-6ca4691cbdd3	7a0f7db6-b58d-4d13-b115-d42f98c24a17	TCGA-KN-8432-01A-11D-2310-10	TCGA-KN-8432-01A-11D-2310-10	DO220510	#N/A	#N/A
a3deafcb-b54f-4b7e-89ac-c92c16fb919f	fabb0ab6-aeba-45a3-89b6-6b642af7b43c	TCGA-KN-8426-01A-11D-2310-10	TCGA-KN-8426-01A-11D-2310-10	DO220478	#N/A	#N/A
34739bd6-b3be-441d-8cdb-e4233bf14080	7ce9bbdc-7819-41de-8454-2c341f112a8b	TCGA-KL-8343-01A-11D-2310-10	TCGA-KL-8343-01A-11D-2310-10	DO220351	#N/A	#N/A
798bd17b-69b7-40d7-92ff-7c2389edcccf	cc7bd8ba-f666-4c2f-8339-a270efe32b4f	TCGA-KO-8410-01A-11D-2310-10	TCGA-KO-8410-01A-11D-2310-10	DO220572	#N/A	Missing from representative MAF (2583) syn:syn7364940
f38fc6ac-2af8-4d89-a514-4e2c5fdf08de	0c781e67-c4ce-4f57-ab48-41fe2540b1a0	TCGA-KL-8342-01A-11D-2310-10	TCGA-KL-8342-01A-11D-2310-10	DO220350	#N/A	#N/A
81bb13fc-f082-4c0b-8066-1729f11ef617	a89dd5e5-e0bb-447a-934a-6cd23b88a1e3	TCGA-KN-8425-01A-11D-2310-10	TCGA-KN-8425-01A-11D-2310-10	DO220474	#N/A	#N/A
6400c324-2c94-477d-acb9-669d4ea46f1e	c280f44f-9fc5-4d8f-951d-7ac7dea7bb32	TCGA-KO-8405-01A-11D-2310-10	TCGA-KO-8405-01A-11D-2310-10	DO220549	#N/A	#N/A
a592e80a-3b1a-46aa-be30-bcd87d6bca6f	3343111d-682e-4f41-8fe1-f744a8ee7e56	TCGA-KN-8419-01A-11D-2310-10	TCGA-KN-8419-01A-11D-2310-10	DO220433	#N/A	#N/A
24f887e1-ce82-40f3-9674-11102bd076c0	caa60826-b6d7-4deb-98ae-ff823e6f36ac	TCGA-KN-8434-01A-11D-2310-10	TCGA-KN-8434-01A-11D-2310-10	DO220519	#N/A	#N/A
9dfcbabf-2bc0-43a2-bdde-d0b2aaca3f6b	58fb07a4-bbae-422a-80c3-df0b9903e92b	TCGA-KO-8411-01A-11D-2310-10	TCGA-KO-8411-01A-11D-2310-10	DO220577	#N/A	#N/A
345a06d6-fa5c-4674-a847-88a6b537cf3c	ca1e534f-08dd-49cb-b628-ae4060eb9fd8	TCGA-KN-8437-01A-11D-2310-10	TCGA-KN-8437-01A-11D-2310-10	DO220535	#N/A	#N/A
715f59dd-a80f-422d-988c-f73f4b987baf	2dc614c7-2b43-40a2-96b2-c69441e4946c	TCGA-KN-8435-01A-11D-2310-10	TCGA-KN-8435-01A-11D-2310-10	DO220525	#N/A	#N/A
97c1a300-978d-4df1-9e97-ce2f92b9eff1	adae4de7-e710-4988-9995-130fd3ece7ac	TCGA-KM-8441-01A-11D-2310-10	TCGA-KM-8441-01A-11D-2310-10	DO220358	#N/A	#N/A
9a90f951-ad96-4883-b97f-ac43395dae5d	e322db1f-f69f-4261-a3a0-2813047df728	TCGA-KN-8418-01A-11D-2310-10	TCGA-KN-8418-01A-11D-2310-10	DO220423	#N/A	#N/A
3feac02a-c99f-4dd9-9eff-e4f5e87f7dc5	4daad1bc-37bf-4a4c-af68-2fc9fe5fbcdb	TCGA-CW-5585-01A-01D-1534-10	TCGA-CW-5585-01A-01D-2103-10	DO19733	#N/A	#N/A
f64e9609-d75d-400c-a92d-d77fd54d6c29	64898c9e-85d6-4550-818c-97947af34b93	TCGA-A3-3372-01A-01D-0966-08	TCGA-A3-3372-01A-01D-2094-10	#N/A	Missing from MC3 Public release	#N/A
252a1c43-f954-44d7-8e31-6bcd0157a05c	a0dfdb3c-4ff7-450a-bf83-9574fe2b3545	TCGA-B2-4099-01A-02D-1251-10	TCGA-B2-4099-01A-02D-2095-10	DO18988	#N/A	#N/A
aad8c8d6-d828-4aac-9cfb-cee893e36850	3955a42e-c0d4-42d8-88c8-b55c7d253ee5	TCGA-BP-4968-01A-01D-1462-08	TCGA-BP-4968-01A-01D-2100-10	DO16269	#N/A	#N/A
81d0d6bb-7319-4b67-bcf7-36df24e76b43	3ea24a72-92da-4505-87ec-afad5026cad8	TCGA-CJ-4918-01A-01D-1429-08	TCGA-CJ-4918-01A-01D-2101-10	DO17977	#N/A	#N/A
9ae0744a-9bc1-4cd7-b7cf-c6569ed9e4aa	a4994dc2-b1a5-4bfa-acdb-17b2e6f06acb	TCGA-CJ-5681-01A-11D-1534-10	TCGA-CJ-5681-01A-11D-1534-10	DO17373	#N/A	#N/A
a56cd282-f6c5-4373-b3d8-676562894598	86bd8bf3-df29-451c-b555-b76a3f1203b7	TCGA-AK-3455-01A-01D-0966-08	TCGA-AK-3455-01A-01D-2233-10	DO18572	#N/A	#N/A
68b7fdb1-22b5-4152-9e69-a41151640cd8	39246396-a434-4d2e-b741-78d904711c56	TCGA-A3-3308-01A-01D-0966-08	TCGA-A3-3308-01A-01D-2094-10	DO16110	#N/A	#N/A
063cfacf-9933-4a2d-8921-0aeb76e12779	0c9d67b7-498f-49de-8cb1-e54d6f827e6b	TCGA-CJ-4639-01A-02D-1386-10	TCGA-CJ-4639-01A-01D-2095-10	DO17791	#N/A	#N/A
51206157-94cc-4702-8247-c98283b487aa	f048112a-4e15-43a8-b918-6dccd5dafb91	TCGA-CW-6093-01A-11D-1669-08	TCGA-CW-6093-01A-11D-2279-10	DO16248	#N/A	#N/A
bcf54c96-2b62-4e24-926f-d77576250dd1	850f981e-2e42-41dd-9b55-8c668e619845	TCGA-DV-5566-01A-01D-1534-10	TCGA-DV-5566-01A-01D-2104-10	DO18651	#N/A	#N/A
dacd4cc2-fc2b-4fbd-adf6-c8a46ae69c91	7477ff80-443a-4173-8e66-ebcd4c7cb2d6	TCGA-CJ-5682-01A-11D-1534-10	TCGA-CJ-5682-01A-11D-2103-10	DO18056	#N/A	#N/A
10d15b7a-16d1-4953-aaef-f193ffa97f42	a476224d-08f4-44f1-93be-ee118f03637a	TCGA-CJ-6033-01A-11D-1669-08	TCGA-CJ-6033-01A-11D-2104-10	DO16881	#N/A	#N/A
64446aec-c125-4c81-b9cc-62482cb1aaed	32c7977a-a034-430d-9866-fc38ee5afe11	TCGA-CZ-5453-01A-01D-1501-10	TCGA-CZ-5453-01A-01D-2102-10	DO18016	#N/A	#N/A
0f53e757-1823-409f-a0ea-249270728e15	bee27c92-2dd6-4be3-a5bc-71ee711ed623	TCGA-A3-3363-01A-01D-0966-08	TCGA-A3-3363-01A-01D-2094-10	DO19028	#N/A	#N/A
d991f23a-dc1b-427a-b798-bd4187d3aa02	1f196dee-0ea1-4219-81a0-689bea0cc70e	TCGA-BP-5168-01A-01D-1421-08	TCGA-BP-5168-01A-01D-2099-10	DO18671	#N/A	#N/A
d429c27a-5963-42fe-b3a0-7252c20669d8	a25cfb86-a952-48aa-8236-b44260d348b4	TCGA-B0-5094-01A-01D-1421-08	TCGA-B0-5094-01A-01D-2099-10	DO16769	#N/A	#N/A
9c181313-5b4c-41c5-9ad5-a5a86fe609aa	d7b663fa-a5fa-49a2-9dac-fd9f2dcd2d60	TCGA-CJ-4899-01A-01D-1462-08	TCGA-CJ-4899-01A-01D-2100-10	DO16233	#N/A	#N/A
00bf0350-8c7c-4b9e-8143-13ea2dc1122f	50ebfc26-18bb-4992-ae91-e4674493ff6d	TCGA-A3-3387-01A-01D-1534-10	TCGA-A3-3387-01A-01D-2102-10	DO17323	#N/A	#N/A
a4f8305f-4409-4776-b34d-4878d18c8693	99db1df2-cb8f-4eea-b403-b2382738d649	TCGA-BP-5010-01A-02D-1421-08	TCGA-BP-5010-01A-02D-2048-08	DO17751	#N/A	#N/A
d7f1db09-8ba0-4b76-bcd2-01c14165f0d5	47e17a0a-26e6-47d0-b993-9ff415df366e	TCGA-A3-3370-01A-02D-1421-08	TCGA-A3-3370-01A-02D-2099-10	DO18452	#N/A	Missing from representative MAF (2583) syn:syn7364941
39c55051-e1bc-4081-962a-17205645de45	c69ae057-2e29-40c9-97ea-01caf72a0d61	TCGA-B2-4102-01A-02D-1386-10	TCGA-B2-4102-01A-02D-2095-10	DO18839	#N/A	#N/A
2c581a74-7716-4c20-b366-a8e1d9a901f6	ff31f675-3699-40c4-a1df-c5b2c59590b7	TCGA-CW-6087-01A-11D-1669-08	TCGA-CW-6087-01A-11D-2279-10	DO20082	#N/A	#N/A
1e046ab9-fa4c-4c15-8d78-ed0048c80ebf	4a9e1f49-0c4a-426c-852d-d6ef170bb716	TCGA-BP-4977-01A-01D-1462-08	TCGA-BP-4977-01A-01D-2048-08	DO17848	#N/A	#N/A
f3c1a125-06e9-41c4-9558-275a3e346cc5	10748e98-37e9-4c22-83a7-c4ac014e2495	TCGA-B2-4101-01A-02D-1458-08	TCGA-B2-4101-01A-02D-2096-10	DO16113	#N/A	#N/A
fb194ca3-10aa-4dc5-8d08-619ddbd6d1b6	94337f97-f552-43d5-b129-56d7c3978e1d	TCGA-B0-5693-01A-11D-1534-10	TCGA-B0-5693-01A-11D-2103-10	DO17722	#N/A	#N/A
b51fa117-2c0a-4e1d-8ec4-9f039073a486	b6241ce5-2cc1-44fb-8de3-f102cba34ddf	TCGA-CZ-5454-01A-01D-1501-10	TCGA-CZ-5454-01A-01D-2102-10	DO17085	#N/A	#N/A
fa5e2900-95e7-4700-9707-a329cd0c77fd	8800192c-ca2c-4bfb-929e-f5f487128135	TCGA-CZ-5987-01A-11D-1669-08	TCGA-CZ-5987-01A-11D-2104-10	DO18701	#N/A	#N/A
b6365bdb-e6d5-4615-95b3-db12a0c2f3d9	0d145a57-2d7e-4688-9970-5ffd7c744326	TCGA-B0-5695-01A-11D-1534-10	TCGA-B0-5695-01A-11D-2103-10	DO17054	#N/A	#N/A
9fb40473-74cb-43cb-9a54-c990b8bbde17	f6803417-895f-465b-8eb0-f4f7290134ad	TCGA-CZ-4856-01A-02D-1429-08	TCGA-CZ-4856-01A-02D-2101-10	DO16688	#N/A	Missing from representative MAF (2583) syn:syn7364942
8fb7fcac-6c1d-40c2-9309-b53821cbef30	67a640c5-67b3-42a8-b503-26931f3f2fbc	TCGA-B1-A47M-01A-11D-A25F-10	TCGA-B1-A47M-01A-11D-A25F-10	DO49736	#N/A	#N/A
e1217ebe-1826-41a9-b6c4-702100a66f5e	d65dcd25-b9b0-4441-8c2e-87c1f98b84a6	TCGA-IA-A40X-01A-11D-A25F-10	TCGA-IA-A40X-01A-11D-A25F-10	DO44478	#N/A	#N/A
ad9455e9-7147-489e-9b1f-3540c457c260	889f5757-69f5-459b-9c28-e891a697503d	TCGA-IA-A40Y-01A-11D-A25F-10	TCGA-IA-A40Y-01A-11D-A25F-10	DO44462	#N/A	#N/A
2425a532-f562-423a-88f5-228642f53875	4df12524-801a-44ac-8a0a-c44ef08da768	TCGA-MH-A55W-01A-11D-A26P-10	TCGA-MH-A55W-01A-11D-A26P-10	DO48516	#N/A	#N/A
19d6cf34-1cd7-4242-a4d1-5d3e11f428aa	d7e9a84f-1cfe-42ca-b11c-5d1af30ef61d	TCGA-AL-3468-01A-01D-1252-08	TCGA-AL-3468-01A-02D-1402-10	DO20839	#N/A	#N/A
72293a70-9dc8-4e4a-acdc-c74587a90420	2c506c3b-504e-43c8-a5c8-3809d47b1e61	TCGA-B3-3926-01A-01D-1252-08	TCGA-B3-3926-01A-02D-1402-10	DO20829	#N/A	Missing from representative MAF (2583) syn:syn7364943
7815397b-aa39-4b79-bcaa-6859a3f115f8	701382e3-3a07-45b2-acb9-ba092b204aac	TCGA-GL-A4EM-01A-11D-A25F-10	TCGA-GL-A4EM-01A-11D-A25F-10	DO44520	#N/A	#N/A
c14407ad-670e-4d1e-9417-2b76f4810fff	dbc46d4c-89f2-4b85-aa91-f33091a47042	TCGA-HE-A5NF-01A-11D-A26P-10	TCGA-HE-A5NF-01A-11D-A26P-10	DO44515	#N/A	#N/A
63d0c49d-918d-41fb-808a-1f8001981917	02561e68-d499-4fe8-91cd-b7fa4ac82b97	TCGA-AL-3472-01A-01D-1252-08	TCGA-AL-3472-01A-01D-1253-10	DO20923	#N/A	#N/A
dddea2e4-b8c3-4157-9d92-6de472e8375a	31d5e8e5-d0d0-4db2-93a3-3f60c5b0bb1f	TCGA-MH-A562-01A-11D-A26P-10	TCGA-MH-A562-01A-11D-A26P-10	DO48495	#N/A	#N/A
e6801359-d1d7-4871-b2fb-180674a2e469	47789372-dbaf-45b9-8c8d-d5bf0ab7e60f	TCGA-B9-4116-01A-01D-1252-08	TCGA-B9-4116-01A-02D-1402-10	DO20849	#N/A	#N/A
f03330dd-c616-4ad5-abc3-6d6b0445e9e9	759085be-67da-42e8-978e-0a606952bf2d	TCGA-B9-4113-01A-01D-1252-08	TCGA-B9-4113-01A-01D-1253-10	DO20780	#N/A	#N/A
ca2b9fe2-97e0-4d4f-afd7-a5acf638800f	1edbacee-2e9f-44c9-8a2a-b1eac9e8ccd5	TCGA-B1-A47O-01A-11D-A25F-10	TCGA-B1-A47O-01A-11D-A25F-10	DO51551	#N/A	#N/A
6ba5f81a-b7a0-4c18-a112-2e11094eec85	7bff579a-3617-4b33-9e52-d0f527d71d7f	TCGA-B9-4117-01A-01D-1252-08	TCGA-B9-4117-01A-02D-1402-10	DO20770	#N/A	#N/A
42f88b95-fa12-47c7-93f1-cf72f207291c	fd68228b-3a34-4674-8e21-142a28e552ac	TCGA-B3-3925-01A-01D-1458-08	TCGA-B3-3925-01A-02D-1402-10	DO20867	#N/A	#N/A
c504d5a9-29b0-4b7e-ac7b-5e543449a0f4	014b96d4-23bd-4424-85c0-e56fb5fef761	TCGA-GL-A59R-01A-11D-A26P-10	TCGA-GL-A59R-01A-11D-A26P-10	DO44525	#N/A	#N/A
483bb781-0179-42e1-bf9c-487b240769b8	76a31e69-5649-4b4c-9bf6-583e8fe03dec	TCGA-A4-A4ZT-01A-11D-A26P-10	TCGA-A4-A4ZT-01A-11D-A26P-10	DO44465	#N/A	#N/A
a9dbd55c-5dcc-48db-8785-6baef3fdd7db	90d9b593-b8cc-4174-9358-cbb35ca60813	TCGA-HE-A5NJ-01A-11D-A26P-10	TCGA-HE-A5NJ-01A-11D-A26P-10	DO49768	#N/A	#N/A
5ecc88f7-8391-4168-af11-07a6bf9b3652	72beeeb5-43bd-4a3c-b216-988fdec683c5	TCGA-A4-A48D-01A-11D-A25F-10	TCGA-A4-A48D-01A-11D-A25F-10	DO44469	#N/A	#N/A
33b7e799-ad10-498f-9948-8ce433311539	67c10d2c-db97-4287-a27e-638cae9f0238	TCGA-HE-A5NH-01A-11D-A26P-10	TCGA-HE-A5NH-01A-11D-A26P-10	DO44485	#N/A	#N/A
642e1379-1061-40bc-9a4c-f7c191e84d9d	d98e2ef8-215d-406f-b3a8-dc85d9269d45	TCGA-AL-3466-01A-01D-1252-08	TCGA-AL-3466-01A-02D-1402-10	DO20928	#N/A	#N/A
0ed63d84-d3fe-4289-9255-35f4a03b703b	017a581c-958d-4642-8c44-6cb78b24db02	TCGA-B9-4115-01A-01D-1553-08	TCGA-B9-4115-01A-01D-1554-10	DO20768	#N/A	#N/A
cf5deb22-f7eb-409d-a0e4-882716199c39	478a17b0-ccc5-4298-a646-27c9478eb37b	TCGA-MH-A560-01A-11D-A26P-10	TCGA-MH-A560-01A-11D-A26P-10	DO48474	#N/A	#N/A
bef23192-57cd-4301-b7a7-5e82ca62482d	13e12018-3fe0-4a9c-bcda-29cb77741c83	TCGA-B9-4617-01A-01D-1252-08	TCGA-B9-4617-01A-01D-1253-10	DO20863	#N/A	#N/A
14dd86c1-dfb3-4124-a453-4d64223bc048	fedbca24-11d5-418e-906b-e6e9967ffd2a	TCGA-AL-3473-01A-01D-1252-08	TCGA-AL-3473-01A-01D-1253-10	DO20905	#N/A	#N/A
b4f515ce-5bee-4e40-a66a-01f41e92181e	14c76981-04bf-4794-8ffc-83a453e588c4	TCGA-AL-A5DJ-01A-11D-A26P-10	TCGA-AL-A5DJ-01A-11D-A26P-10	DO49728	#N/A	#N/A
88e35d25-d98d-4576-8ebe-1cd74010ecd8	5c34510f-6f54-4310-aefc-cb51af41f9d1	TCGA-B9-A44B-01A-11D-A25F-10	TCGA-B9-A44B-01A-11D-A25F-10	DO44496	#N/A	#N/A
40a609bb-2c8f-4146-83c4-e7b0d1b23619	839d1e14-3643-4dc6-a145-f933da3592c2	TCGA-HE-A5NI-01A-11D-A26P-10	TCGA-HE-A5NI-01A-11D-A26P-10	DO49767	#N/A	Missing from representative MAF (2583) syn:syn7364944
2deb8f9a-9e0a-46d1-bcb5-902db3b5c8ac	20b7a7c2-419c-40f6-b9c5-2423814fa8cb	TCGA-A4-A57E-01A-11D-A26P-10	TCGA-A4-A57E-01A-11D-A26P-10	DO44517	#N/A	#N/A
d8415cf6-8e4d-4c54-811e-199da14237f1	315d928e-871e-4086-89df-7be1e4d6e216	TCGA-B9-4114-01A-01D-1252-08	TCGA-B9-4114-01A-01D-1253-10	DO20915	#N/A	#N/A
a441697c-4ca0-4eab-9b01-b9cb50223ce2	599676cb-6694-40fe-899d-a74af7d7058c	TCGA-HE-A5NL-01A-11D-A26P-10	TCGA-HE-A5NL-01A-11D-A26P-10	DO44528	#N/A	#N/A
2e8ad1cd-d5d5-4bb4-8bbd-e9bef45088da	95679ad2-e19a-4753-aaa8-a8831780bc67	TCGA-MH-A561-01A-11D-A26P-10	TCGA-MH-A561-01A-11D-A26P-10	DO48509	#N/A	#N/A
b19ec4cd-2876-4a2b-bcb9-b3c8db54fc15	6d1b8546-ad16-43ef-a8ea-2ff8e7a54942	TCGA-MH-A55Z-01A-11D-A26P-10	TCGA-MH-A55Z-01A-11D-A26P-10	DO48482	#N/A	#N/A
bd2cc59d-f5ce-46ed-beb0-4c80b24cbe71	0b2321a3-43d9-4837-b3ce-cd645073b070	TCGA-B1-A47N-01A-11D-A25F-10	TCGA-B1-A47N-01A-11D-A25F-10	DO49738	#N/A	#N/A
6847e993-1414-4e6f-a2af-39ebe218dd7c	a2335121-9368-4e66-a7f0-dbadcc1549d6	TCGA-DB-5278-01A-01D-1468-08	TCGA-DB-5278-01A-01D-1468-08	DO22496	#N/A	#N/A
4853fd17-7214-4f0c-984b-1be0346ca4ab	5d4f1a07-2e81-4c95-8e18-93e7a9218a73	TCGA-DU-7009-01A-11D-2024-08	TCGA-DU-7009-01A-11D-2024-08	DO22117	#N/A	#N/A
85d915b8-0184-4ec7-93ad-e9ffa2f5743b	29fcffd5-47d8-40da-9465-971a18053f32	TCGA-DU-5874-01A-11D-1705-08	TCGA-DU-5874-01A-11D-1705-08	DO22524	#N/A	#N/A
8c46a1df-1c10-4188-992a-a55b782494c9	0d2a5843-e3cf-43d9-b0b0-0c57338bd43d	TCGA-E1-5318-01A-01D-1468-08	TCGA-E1-5318-01A-01D-1468-08	DO22195	#N/A	#N/A
c1abb741-4fcd-4161-b057-c7efd619cc99	af73f1b8-062e-4474-aab7-d2fc7469cf42	TCGA-HW-7487-01A-11D-2024-08	TCGA-HW-7487-01A-11D-2024-08	DO22324	#N/A	#N/A
86386b36-2950-4479-b79f-4b347053c8bc	a068692f-63d8-4acc-af7d-3216161626e4	TCGA-HT-7695-01A-11D-2253-08	TCGA-HT-7695-01A-11D-2253-08	DO22417	#N/A	#N/A
67f88cd9-ab77-4227-a8d7-5512246f9772	dd630ea3-cfd5-4401-b0bb-02c0f4948409	TCGA-HW-7486-01A-11D-2024-08	TCGA-HW-7486-01A-11D-2024-08	DO22736	#N/A	#N/A
c6888be2-4517-41e4-a801-9c915f24e737	72b1ba43-5ec0-4834-a5cb-4da393ec2a35	TCGA-FG-5964-01A-11D-1705-08	TCGA-FG-5964-01A-11D-1705-08	DO22293	#N/A	#N/A
2aeaab9f-4459-4be8-91e7-e0746cbd671c	480f0808-357a-41b4-bc23-87572f2eac82	TCGA-FG-8182-01A-11D-2253-08	TCGA-FG-8182-01A-11D-2253-08	DO22285	#N/A	#N/A
f92a34fa-014e-4b41-a6d0-3b46b8c8a3ee	7db5654e-ca78-4fba-a6fc-def98bda2bb5	TCGA-DU-6407-01A-13D-1705-08	TCGA-DU-6407-01A-13D-1705-08	DO22295	#N/A	#N/A
88395c0e-4afe-434d-8b20-5a3eef8b7f00	132d1df0-41ff-4870-b8f4-08a901c5702e	TCGA-HT-7602-01A-21D-2086-08	TCGA-HT-7602-01A-21D-2086-08	DO22106	#N/A	#N/A
d252a54e-0377-4b3e-8228-26108ea704fa	11cf3db9-8cde-4305-af49-a3ec86e4415a	TCGA-E1-5319-01A-01D-1893-08	TCGA-E1-5319-01A-01D-1893-08	DO22536	#N/A	#N/A
ba94c29b-b76e-4d67-bf5a-ce6bc45d85f8	cfc7fd90-41c9-4af2-887b-5fd6e8dbb337	TCGA-DU-7301-01A-11D-2086-08	TCGA-DU-7301-01A-11D-2086-08	DO22382	#N/A	#N/A
3a81f733-b3a3-4578-b925-a663612bc92c	a8e85ad2-1787-46c3-b59a-bd6c971e1b5c	TCGA-DU-6401-01A-11D-1705-08	TCGA-DU-6401-01A-11D-1705-08	DO22490	#N/A	#N/A
d414e076-dcb6-4edf-adef-0abdc57354ea	4080feef-1490-411c-9099-1c02f28efc71	TCGA-CS-6668-01A-11D-1893-08	TCGA-CS-6668-01A-11D-1893-08	DO22548	#N/A	#N/A
a78544d7-65c6-4778-af62-ceec24c14056	7da0d7d7-5675-4c15-91c1-2c8132f4625d	TCGA-IK-7675-01A-11D-2086-08	TCGA-IK-7675-01A-11D-2086-08	DO22720	#N/A	#N/A
218a9531-9264-43bc-8535-858d4cb0919e	8795ded4-a846-4102-89c5-6e085f4daa74	TCGA-CS-6669-01A-11D-1893-08	TCGA-CS-6669-01A-11D-1893-08	DO22257	#N/A	Missing from representative MAF (2583) syn:syn7364945
3d477ac1-3bdf-4410-9594-1a3a1412c6ae	cec22210-b47f-434c-8aa2-990325aab22d	TCGA-CS-5395-01A-01D-1468-08	TCGA-CS-5395-01A-01D-1468-08	DO22356	#N/A	#N/A
00493087-9d9d-40ca-86d5-936f1b951c93	d002f50e-b6bb-4eb7-9b78-9c958d8736f1	TCGA-EZ-7264-01A-11D-2024-08	TCGA-EZ-7264-01A-11D-2024-08	DO22145	#N/A	#N/A
36e1d9cc-32ec-4a0a-8fb1-c46f058a6fb8	d82285a6-202a-4fa9-bca8-c558aafe1cd5	TCGA-G3-A25W-01A-11D-A16V-10	TCGA-G3-A25W-01A-11D-A16V-10	DO22970	#N/A	#N/A
4c3eda94-56f4-46d3-8c88-50d476e773f6	05e87457-a2d1-4f7c-abe2-09e2af141177	TCGA-DD-A1ED-01A-11D-A152-10	TCGA-DD-A1ED-01A-11D-A152-10	DO22998	#N/A	#N/A
b9098b7c-eab0-4ef5-b968-8d3024bf32f7	587c738b-e5ba-493a-9169-6fa6c8939144	TCGA-FV-A3R2-01A-11D-A22F-10	TCGA-FV-A3R2-01A-11D-A22F-10	DO44994	#N/A	#N/A
305a5074-5384-45a0-985d-289b178d09f6	0ef72a13-334f-4827-a524-5d142d11f306	TCGA-EP-A2KB-01A-11D-A183-10	TCGA-EP-A2KB-01A-11D-A183-10	DO22932	#N/A	#N/A
5d58b984-e0b8-4237-a576-0e9d4079599e	4a66ea1f-6eff-40a9-aa24-ff0d44ed55f0	TCGA-DD-A4NB-01A-12D-A25V-10	TCGA-DD-A4NB-01A-12D-A25V-10	DO48552	#N/A	#N/A
f1a4f60a-5228-47cd-883f-ff8d2dfe1633	e3808cba-9eaf-4d6f-ae5c-eb44724e3816	TCGA-PD-A5DF-01A-11D-A27I-10	TCGA-PD-A5DF-01A-11D-A27I-10	DO52307	#N/A	#N/A
a2f143d6-ba07-4ff0-960d-b29c3c716665	c5bcc799-ea6d-41ed-9ba7-fb6855c5b2e1	TCGA-CC-5261-01A-01D-A12Z-10	TCGA-CC-5261-01A-01D-A12Z-10	#N/A	Missing from MC3 Public release	#N/A
47e5ff56-9534-4fcf-a593-33027e877f93	c6b52b5b-40b5-41fe-90e3-c8186bfd0640	TCGA-CC-5262-01A-01D-A12Z-10	TCGA-CC-5262-01A-01D-A21X-10	DO22953	#N/A	#N/A
6b50391f-d890-4ca0-b942-beab0f8bf1c9	3fa011cd-03ba-4451-9927-357ec1be2f72	TCGA-G3-A25Y-01A-11D-A16V-10	TCGA-G3-A25Y-01A-11D-A16V-10	DO23073	#N/A	#N/A
352fbbb4-88a5-4354-b1fa-3a01da3fbfa7	471d9d36-05e2-4ae4-9a63-9306d81eb8b7	TCGA-MR-A520-01A-11D-A25V-10	TCGA-MR-A520-01A-11D-A25V-10	DO219580	#N/A	#N/A
d252f328-4583-4e97-9a71-bb2885f06f73	b4aa7700-bd6f-4616-aa78-e9fcecd4ee5a	TCGA-DD-A1EL-01A-11D-A152-10	TCGA-DD-A1EL-01A-11D-A152-10	DO23048	#N/A	#N/A
c36213e4-c057-46f5-ada5-f1f921855bb4	e28e4e01-1068-4bca-a6b8-6c67dd9fb4e7	TCGA-HP-A5MZ-01A-21D-A27I-10	TCGA-HP-A5MZ-01A-21D-A27I-10	DO49695	#N/A	#N/A
1127b561-ea40-4d5e-95df-daa0a5ebc1e4	c74d1a99-fbfb-4dfa-8437-c179e2c13780	TCGA-G3-A3CK-01A-11D-A20W-10	TCGA-G3-A3CK-01A-11D-A20W-10	DO22839	#N/A	#N/A
c016d025-3c92-41c5-b846-493b1fcce79e	1154ca01-a81e-4e19-b8d0-13ab1dd51cc1	TCGA-DD-A1EI-01A-11D-A12Z-10	TCGA-DD-A1EI-01A-11D-A12Z-10	DO22959	#N/A	#N/A
c285c2fa-24b4-47a1-874d-86e74b002b05	263dcbc9-e007-48aa-8b1d-75e65134fed1	TCGA-FV-A3R3-01A-11D-A22F-10	TCGA-FV-A3R3-01A-11D-A22F-10	DO22978	#N/A	#N/A
484a41c8-fcaf-488d-97dc-bfe6a4b88a95	d31b3c7d-cd01-4b85-8186-185728aa7394	TCGA-EP-A2KA-01A-11D-A183-10	TCGA-EP-A2KA-01A-11D-A183-10	DO23023	#N/A	#N/A
96517058-18d2-4847-8085-768ca8aa1565	8580526a-1787-44db-be52-0c236b7f087f	TCGA-DD-A3A9-01A-11D-A25V-10	TCGA-DD-A3A9-01A-11D-A25V-10	DO44888	#N/A	#N/A
c1d9ed06-7498-4c6c-a0de-dbf28e868109	73764b1b-b855-4457-9ff8-e6f12765a24b	TCGA-BC-A216-01A-11D-A152-10	TCGA-BC-A216-01A-11D-A152-10	DO22929	#N/A	#N/A
9c681cd9-25fb-42ac-aa6b-bb962882fa22	ae3dd9b8-c1dc-4c40-97a8-4cb73564030e	TCGA-DD-A1EJ-01A-11D-A152-10	TCGA-DD-A1EJ-01A-11D-A152-10	DO22994	#N/A	#N/A
7fc7b316-f3d3-4e71-9417-423fe334e6bc	396d0aff-d9f6-4e27-8b3e-8ec2aad81d88	TCGA-ED-A459-01A-11D-A25V-10	TCGA-ED-A459-01A-11D-A25V-10	DO44974	#N/A	#N/A
1c00925b-7328-4db0-b930-04aab2d80719	90fa6ffe-b841-418a-9e28-f3c8be196788	TCGA-BW-A5NP-01A-11D-A27I-10	TCGA-BW-A5NP-01A-11D-A27I-10	DO52172	#N/A	#N/A
29b92b51-7ba3-42a9-97d3-6a9b5e43f928	1854075a-5c7f-4bf2-b931-6076bc25a027	TCGA-DD-A3A7-01A-11D-A22F-10	TCGA-DD-A3A7-01A-11D-A22F-10	DO44982	#N/A	#N/A
d02597f8-3ac7-4165-a65f-0e134e5d215b	2b86c395-f1a6-4893-80e4-8868660e0931	TCGA-FV-A4ZQ-01A-11D-A25V-10	TCGA-FV-A4ZQ-01A-11D-A25V-10	DO44877	#N/A	#N/A
6b25a78f-20dc-4ccc-b4c0-f9885d16725d	09392e9c-2605-4027-a205-1212c529c54f	TCGA-CC-A1HT-01A-11D-A12Z-10	TCGA-CC-A1HT-01A-11D-A12Z-10	DO23028	#N/A	#N/A
90611290-e44c-438e-91aa-f3b83dae3b71	0eab6f5f-3734-478c-a869-adbe899ca456	TCGA-DD-A1EB-01A-11D-A12Z-10	TCGA-DD-A1EB-01A-11D-A12Z-10	DO22836	#N/A	#N/A
4cff8590-559e-4204-8635-96e11bfeda68	4ad2bc9f-a3cb-4300-91c3-d50fc67c30cd	TCGA-DD-A3A8-01A-11D-A22F-10	TCGA-DD-A3A8-01A-11D-A22F-10	DO44883	#N/A	#N/A
50ee360c-e3df-4888-9999-ebb88e271d08	f646406d-9716-49c7-8956-4334d625a93b	TCGA-DD-A1EG-01A-11D-A20W-10	TCGA-DD-A1EG-01A-11D-A20W-10	#N/A	Missing from MC3 Public release	#N/A
2bff30d5-be79-4686-8164-7a7d9619d3c0	9d89da75-e29a-4d45-88e7-d4eec105056e	TCGA-BC-A217-01A-11D-A152-10	TCGA-BC-A217-01A-11D-A152-10	DO22896	#N/A	#N/A
dcf45005-7e6d-4c26-9994-f973da7e814f	5d1c40ec-e44d-4b09-8028-dc2332c7bda6	TCGA-ES-A2HS-01A-11D-A183-10	TCGA-ES-A2HS-01A-11D-A183-10	DO22838	#N/A	#N/A
d6ccfd6f-2ea9-499d-a25d-4ba9d4a9258e	39dd027d-dbe7-4a29-b355-83fbc7a8d28b	TCGA-ES-A2HT-01A-12D-A183-10	TCGA-ES-A2HT-01A-12D-A183-10	DO22956	#N/A	#N/A
84a0bc36-9f29-4b23-aee1-bf5ff71f697b	5784d84c-90cc-40e5-bb6b-6c7b0d824dd9	TCGA-DD-A1E9-01A-21D-A152-10	TCGA-DD-A1E9-01A-21D-A152-10	DO22890	#N/A	Missing from representative MAF (2583) syn:syn7364946
03c88506-d72e-4a44-a34e-a7f0564f1799	47182893-ff2a-49bd-8098-7a0f6a68b18d	TCGA-DD-A4NG-01A-11D-A27I-10	TCGA-DD-A4NG-01A-11D-A27I-10	DO44885	#N/A	#N/A
6e6ad1a2-f1eb-44d1-9852-f5752afcf5eb	0e0800de-8aef-4f6a-9f0e-d38ceb0fa19e	TCGA-FV-A496-01A-11D-A25V-10	TCGA-FV-A496-01A-11D-A25V-10	DO44966	#N/A	#N/A
70422e6d-cb1f-4284-8be9-1d4517ffad60	46420bae-354b-4065-891f-73ff1b81f442	TCGA-G3-A5SL-01A-11D-A27I-10	TCGA-G3-A5SL-01A-11D-A27I-10	DO44978	#N/A	#N/A
5df489bc-6178-49e4-8a42-506f70300dff	34b10402-382a-42b8-b1cc-5a34d8c75dba	TCGA-FV-A3I0-01A-11D-A22F-10	TCGA-FV-A3I0-01A-11D-A22F-10	DO45009	#N/A	#N/A
463bf060-8ba6-4a73-8173-172025f7b527	3b16d3ec-235f-4676-8e55-8cabf7059461	TCGA-EP-A26S-01A-11D-A16V-10	TCGA-EP-A26S-01A-11D-A16V-10	DO22854	#N/A	#N/A
c05adc19-2e01-4712-a35a-69eee4d40998	f5abdd8f-41aa-4a15-8d9d-e3498058fd33	TCGA-G3-A25S-01A-11D-A16V-10	TCGA-G3-A25S-01A-11D-A16V-10	DO23018	#N/A	#N/A
343fcbc2-f30c-4ffa-a0b3-f5bb21e5e70b	452ce387-f306-4893-9f3a-c4837d0d7cc8	TCGA-DD-A4NE-01A-11D-A27I-10	TCGA-DD-A4NE-01A-11D-A27I-10	DO44889	#N/A	#N/A
84fe77b4-f6cc-49bf-a6b9-1621ec9394f8	e320bad9-ac75-4b26-bffe-ff4a9b3ad9bc	TCGA-FV-A495-01A-11D-A25V-10	TCGA-FV-A495-01A-11D-A25V-10	DO44890	#N/A	#N/A
5ead73fe-1c34-48ed-b20d-89fc3c82dbd6	3d1f17b2-37f1-473c-8b3b-da12679dd59a	TCGA-DD-A4NA-01A-11D-A25V-10	TCGA-DD-A4NA-01A-11D-A25V-10	DO44930	#N/A	#N/A
992d9566-b1da-421a-bf36-d23382b115fa	12e8c2db-e995-4397-8771-8692405eae81	TCGA-FV-A3I1-01A-11D-A22F-10	TCGA-FV-A3I1-01A-11D-A22F-10	DO22914	#N/A	#N/A
d9c5493e-f969-4c04-a646-9a3134011021	f6530596-d9d3-40fb-b76a-e10324c5907f	TCGA-DD-A4ND-01A-11D-A25V-10	TCGA-DD-A4ND-01A-11D-A25V-10	DO44986	#N/A	#N/A
7f03cb4b-60b1-460c-b761-402e7ca09b0d	795963e0-ae25-485b-a916-ebc8a6763089	TCGA-DD-A3A6-01A-11D-A22F-10	TCGA-DD-A3A6-01A-11D-A22F-10	DO44875	#N/A	#N/A
670f971f-a525-4ef8-91ba-610cfbaeb914	3179f01d-3a6b-400a-999f-17f61d10b10a	TCGA-ED-A4XI-01A-11D-A25V-10	TCGA-ED-A4XI-01A-11D-A25V-10	DO48505	#N/A	#N/A
e30c64d5-e796-4cfc-8dc8-6e62bf97822f	6f2d26c8-70fc-4735-ad60-29abbce240fe	TCGA-BW-A5NQ-01A-11D-A27I-10	TCGA-BW-A5NQ-01A-11D-A27I-10	DO49659	#N/A	#N/A
63adc09c-e1b1-40dd-9c35-2f8276b656fc	c9b41e85-ce54-4dbf-af6d-e045d233641c	TCGA-FV-A23B-01A-11D-A16V-10	TCGA-FV-A23B-01A-11D-A16V-10	DO44872	#N/A	#N/A
3bacc189-01b8-46cc-a442-f393c0f428c6	39e2b385-bf92-4823-9115-7e4d65e0dc1b	TCGA-CC-5260-01A-01D-A12Z-10	TCGA-CC-5260-01A-01D-A12Z-10	DO22860	#N/A	#N/A
b9f03936-1de5-4330-8b0f-6d0ab533876e	65de908e-debd-4d22-9db9-17f1d5b46d2b	TCGA-DD-A1EH-01A-11D-A12Z-10	TCGA-DD-A1EH-01A-11D-A12Z-10	DO22986	#N/A	#N/A
4904d56f-0fe7-4482-8f6d-9e54d261f399	471b30a3-00aa-4009-adbe-3986b023bc6d	TCGA-FV-A2QQ-01A-11D-A22F-10	TCGA-FV-A2QQ-01A-11D-A22F-10	DO44919	#N/A	#N/A
f7e9eed5-7a0b-4b2d-bea3-fd8c42a3b90e	919e0f1b-a6b4-4d4b-b72e-e71f98e04df3	TCGA-BC-A10Q-01A-11D-A12Z-10	TCGA-BC-A10Q-01A-11D-A12Z-10	DO22887	#N/A	#N/A
81a8b064-e735-455f-b2db-af7ae11daac4	d7e2cd1b-6f6c-486c-b438-c5f0036a61fa	TCGA-BW-A5NO-01A-11D-A27I-10	TCGA-BW-A5NO-01A-11D-A27I-10	DO52171	#N/A	#N/A
0d259ac2-03d1-4814-9b0b-d05e3a6029b7	26eb3532-69b7-45ac-83f8-45881b8a72b3	TCGA-EP-A3RK-01A-11D-A22F-10	TCGA-EP-A3RK-01A-11D-A22F-10	DO22935	#N/A	#N/A
4624fd20-e2ad-4826-b606-a694b04e1076	c69a8801-43a8-4d90-bbb9-14ed624c6de0	TCGA-G3-A25V-01A-11D-A16V-10	TCGA-G3-A25V-01A-11D-A16V-10	DO22866	#N/A	#N/A
41840dc1-5ea2-4f01-a0d4-8b65add641c8	07446dbe-b018-417d-b681-db0f88cb34aa	TCGA-G3-A25T-01A-11D-A16V-10	TCGA-G3-A25T-01A-11D-A16V-10	DO22884	#N/A	#N/A
5a7f3c88-ef02-4e97-8009-5622245b6a09	23614ca3-6f1a-4e8f-9eec-b59e28a24ddc	TCGA-55-6986-01A-11D-1945-08	TCGA-55-6986-01A-11D-1945-08	DO23651	#N/A	#N/A
cd0aeed5-93a1-4287-8a88-fe6b7b5e3983	b7300c3c-3290-4136-84d7-bb31ae08055a	TCGA-50-6597-01A-11D-1855-08	TCGA-50-6597-01A-11D-1855-08	DO26062	#N/A	#N/A
3b20d548-2a7d-4031-85a1-425ca7201d7a	cba0b120-0420-4f13-880a-3eae1957dc28	TCGA-67-3771-01A-01D-1040-01	TCGA-67-3771-01A-01D-0969-08	DO25797	#N/A	#N/A
dd09c7aa-744a-413d-839f-e75e1825f9f9	0ce2e84e-889f-4acc-88bd-f0fc5bff1941	TCGA-64-1680-01A-02D-0969-08	TCGA-64-1680-01A-02D-1040-01	DO24646	#N/A	#N/A
49dec0c2-8e75-4f44-a253-82b2ea605890	0c9368f6-0c03-4217-9d64-01d78463472f	TCGA-49-6742-01A-11D-1855-08	TCGA-49-6742-01A-11D-1855-08	DO25622	#N/A	#N/A
15e097e3-e468-466c-8e57-b59fba90bbf2	6e409f3e-337d-4970-9d06-8cee79d585b9	TCGA-55-8299-01A-11D-2284-08	TCGA-55-8299-01A-11D-2284-08	DO25927	#N/A	#N/A
f5a97315-1906-4774-980e-0879c6ad368e	56a1d9d9-609f-4f0b-b51f-6ac24a9a0971	TCGA-50-5066-01A-01D-1625-08	TCGA-50-5066-01A-01D-1625-08	DO25040	#N/A	Missing from representative MAF (2583) syn:syn7364947
23d77176-dfed-4bee-ac96-9934377d8d81	5c38c90b-e8f8-4303-af37-dab774f14203	TCGA-05-4398-01A-01D-1265-08	TCGA-05-4398-01A-01D-1931-08	DO25847	#N/A	#N/A
b7f11036-7ac4-41bc-a9a4-64162725fdfc	39c10c07-ecd3-4b58-b7bb-db18e5a62fdd	TCGA-55-6982-01A-11D-1945-08	TCGA-55-6982-01A-11D-1945-08	DO26280	#N/A	#N/A
bd3e88b3-b37c-4641-85fa-d8125ba324ca	d53d8b9b-c4a5-450d-be9d-0190587609e3	TCGA-50-5930-01A-11D-1753-08	TCGA-50-5930-01A-11D-1753-08	DO25189	#N/A	#N/A
fa2c3620-7e82-4b12-b135-87986f0f2890	e94ddf83-1c87-4f31-80e6-34438be816d7	TCGA-97-8171-01A-11D-2284-08	TCGA-97-8171-01A-11D-2284-08	DO24130	#N/A	#N/A
de614a3e-1c0d-49c7-a2f1-28bc58e6e5c7	f0200faa-9366-4575-a001-03a1dd986aaa	TCGA-05-4420-01A-01D-1265-08	TCGA-05-4420-01A-01D-1931-08	DO24675	#N/A	#N/A
fa8844f8-c4b6-487a-8187-e30c12a7a453	9da657da-8263-4d5b-a041-984ac9c31bfd	TCGA-78-7535-01A-11D-2063-08	TCGA-78-7535-01A-11D-2063-08	DO24860	#N/A	#N/A
9ffcb7fa-424c-4f93-87a7-ce5e9053c613	2fd3b70d-68de-4f70-bb02-405d3750c636	TCGA-73-4666-01A-01D-1265-08	TCGA-73-4666-01A-01D-1931-08	DO26230	#N/A	#N/A
199bbb0f-996c-40c1-b06d-2066f04be778	be64dc01-15c1-456b-8f83-d7369db8c6e2	TCGA-78-7158-01A-11D-2036-08	TCGA-78-7158-01A-11D-2036-08	DO24729	#N/A	#N/A
23d86395-9e20-4cf9-bf7e-f76544a1f772	716a46b5-bcb0-4693-845b-6787d5cf0630	TCGA-49-4486-01A-01D-1265-08	TCGA-49-4486-01A-01D-1931-08	DO23786	#N/A	#N/A
37d0cf1b-1743-4852-8073-372b16b5c17d	12a078e1-ac62-4cfc-888a-c6aaf2dde59c	TCGA-05-5429-01A-01D-1625-08	TCGA-05-5429-01A-01D-1625-08	DO23942	#N/A	#N/A
d5443922-fea5-4ff0-bd6e-8ce04e1951d8	fc69e232-9e4a-4fcf-b562-4291c3580cf6	TCGA-55-7281-01A-11D-2036-08	TCGA-55-7281-01A-11D-2036-08	DO25985	#N/A	#N/A
0b19bee7-5281-4915-9d98-c20eb3e84ecf	b63c7333-3edf-4170-9683-7e05a0a8aea9	TCGA-05-4397-01A-01D-1265-08	TCGA-05-4397-01A-01D-1931-08	DO25320	#N/A	#N/A
bce88385-4a1b-4a8c-920c-060f6a2675d4	7b01d7aa-5914-4ded-836e-b4b20cf11f37	TCGA-05-4395-01A-01D-1265-08	TCGA-05-4395-01A-01D-2364-08	DO25444	#N/A	#N/A
d17eda6c-b986-4ba3-b0e9-bac7a751c26a	33ba2ee0-6bed-4605-aafa-1cd8455e0c4f	TCGA-78-7156-01A-11D-2036-08	TCGA-78-7156-01A-11D-2036-08	DO23720	#N/A	Missing from representative MAF (2583) syn:syn7364948
9c7b3ac8-1352-49cd-8a8c-df6b19f6fd64	ea405453-98e5-4032-92bc-d9c56589f054	TCGA-44-6148-01A-11D-1753-08	TCGA-44-6148-01A-11D-1753-08	DO25737	#N/A	#N/A
020fab36-c7de-4933-b2bf-dc7b019a1326	7e51b3ac-c227-4036-b2f0-8d3f65b7628a	TCGA-91-6847-01A-11D-1945-08	TCGA-91-6847-01A-11D-1945-08	DO23584	#N/A	#N/A
bf7462a2-394f-4838-bcb6-4d0126fa48b1	d17abd48-28ac-448f-84ea-3b5b4a8d6c70	TCGA-50-6591-01A-11D-1753-08	TCGA-50-6591-01A-11D-1753-08	DO23702	#N/A	#N/A
0176cf1d-0760-4769-a493-277f4bb7585e	42b89466-723e-4786-adeb-da1bf88f7bda	TCGA-05-4396-01A-21D-1855-08	TCGA-05-4396-01A-21D-1855-08	DO23838	#N/A	#N/A
fa6a60f5-8949-4e01-9435-d3117601627f	5a84f53b-06bb-40d2-84b6-01b4e39e2590	TCGA-49-4512-01A-21D-1855-08	TCGA-49-4512-01A-21D-1855-08	DO23735	#N/A	#N/A
14bf9bfb-14d6-4cac-a556-828f680e8a15	f9824fd3-9156-460b-95bf-450666474d68	TCGA-05-4389-01A-01D-1265-08	TCGA-05-4389-01A-01D-1931-08	DO24307	#N/A	#N/A
d9cd7f95-07d3-4b87-be83-87340b08d249	ff6c65c5-778a-44a3-8f08-f7e95f556dd6	TCGA-75-6203-01A-11D-1753-08	TCGA-75-6203-01A-11D-1753-08	DO25887	#N/A	#N/A
2bde43e2-fd4e-413e-adc7-c50bca75d358	dd553bbf-0d6f-4ad9-b4f8-8dab8c3666ca	TCGA-44-2659-01A-01D-0969-08	TCGA-44-2659-01A-01D-1931-08	DO23744	#N/A	#N/A
46693a2b-5105-4770-a9e1-031dfedeb694	3b48f952-656c-4ef3-a700-2e05f520a220	TCGA-55-6972-01A-11D-1945-08	TCGA-55-6972-01A-11D-1945-08	DO25010	#N/A	#N/A
c437535b-2acc-4236-beae-94e2c1336830	e430bb60-c994-44f2-837e-20bef77d1b5c	TCGA-38-4628-01A-01D-1265-08	TCGA-38-4628-01A-01D-1931-08	DO26354	#N/A	#N/A
53d32d8b-5649-42b0-8c52-2c39af2a961b	f77e9148-da88-4a97-91d7-12da713a2afc	TCGA-73-4659-01A-01D-1265-08	TCGA-73-4659-01A-01D-1931-08	DO24467	#N/A	#N/A
52910a60-bb15-4ba5-9d09-50d8ee6a445b	9764b3c3-6a24-44e3-aabf-73951a64cc82	TCGA-75-5147-01A-01D-1625-08	TCGA-75-5147-01A-01D-1625-08	DO24497	#N/A	#N/A
09bc8542-4ea1-4599-91b3-d606425b37e2	04f060dd-1ac3-4019-8ddc-1d0e31b93c4d	TCGA-91-6840-01A-11D-1945-08	TCGA-91-6840-01A-11D-1945-08	DO23608	#N/A	#N/A
68c2a355-862c-4657-b296-5776ed8447b0	2a4e7fd1-5494-4be3-94f2-a724d672d0b8	TCGA-67-6215-01A-11D-1753-08	TCGA-67-6215-01A-11D-1753-08	DO25068	#N/A	#N/A
0ce6f3ed-bdbc-4b70-9db4-2e48f4bf644d	0d1ac080-0a1d-45a1-8589-f1e4329b61ab	TCGA-75-7030-01A-11D-1945-08	TCGA-75-7030-01A-11D-1945-08	DO23648	#N/A	#N/A
6726c157-f688-491d-8b56-35628645df89	6b3a2b54-d177-483c-a652-613bf54aee28	TCGA-50-5932-01A-11D-1753-08	TCGA-50-5932-01A-11D-1753-08	DO23610	#N/A	#N/A
309f5324-5608-4f62-b744-5ab268b70927	9f54858d-3f12-48ad-963f-d09b5e73ef19	TCGA-55-6984-01A-11D-1945-08	TCGA-55-6984-01A-11D-1945-08	DO23687	#N/A	#N/A
53bb7112-3e38-45fe-a9c4-1b0871babf4a	890006d6-7dde-4072-81b6-d82b68f087e5	TCGA-64-1678-01A-01W-0928-08	TCGA-64-1678-01A-01D-1040-01	#N/A	syn:syn5877280 Not processed by BROAD F,F	#N/A
11f505fa-9306-468a-bbcd-d278892da83f	0b231e34-2420-41d2-93e0-de7baf972c0d	TCGA-44-2665-01A-01D-A271-08	TCGA-44-2665-01A-01D-0969-08	DO23582	#N/A	Missing from representative MAF (2583) syn:syn7364949
7692e684-4af2-4892-80ad-1f417b6b38fa	4e02dcde-b30d-4ff2-9327-dc0921c29ef4	TCGA-78-7146-01A-11D-2036-08	TCGA-78-7146-01A-11D-2036-08	DO23717	#N/A	Missing from representative MAF (2583) syn:syn7364950
935b113e-f5ed-4a07-8e1d-1603daba7f40	d7613237-65a0-4165-8447-bb7a2bacdb26	TCGA-22-1016-01A-01D-1521-08	TCGA-22-1016-01A-01D-1521-08	DO26971	#N/A	#N/A
fb0c6353-a90c-45e2-9355-7cd16cf756ff	975bab75-78f4-4561-a848-4451be3c9409	TCGA-21-1083-01A-01D-1521-08	TCGA-21-1083-01A-01D-1521-08	DO26769	#N/A	#N/A
8cf9b32d-3d6f-4898-8c7a-89511b754021	73bddf4e-2c95-49c6-8698-d0114c29ce39	TCGA-21-1078-01A-01D-1521-08	TCGA-21-1078-01A-01D-1521-08	DO26653	#N/A	#N/A
1c3df485-8e75-4378-87f6-c6463a520624	4e76e7ca-9d21-4a33-8ee6-296b2e0683dd	TCGA-21-1082-01A-01D-1521-08	TCGA-21-1082-01A-01D-1521-08	DO26463	#N/A	#N/A
d2ab2555-7288-47a4-a80c-bf62d65b67b8	ff4c535e-4d65-4339-92d7-38d0df489a9f	TCGA-18-4721-01A-01D-1441-08	TCGA-18-4721-01A-01D-1441-08	DO27104	#N/A	#N/A
706868b5-4920-433a-bea3-92e9bf83059b	5926b8a2-c05d-421d-93bf-342d1dc076d4	TCGA-66-2744-01A-01D-0983-08	TCGA-66-2744-01A-01D-A320-08	DO27025	#N/A	#N/A
d54ca81c-1bcc-41ea-b17a-9f7249ebe9c1	eca31ac5-dc30-4402-ae79-fed0b3080a8c	TCGA-60-2711-01A-01D-1522-08	TCGA-60-2711-01A-01D-0963-08	DO26987	#N/A	#N/A
c48d7f4a-e98a-4077-a749-eb9f56f05b84	64dd91a8-5914-44ba-88fe-c718397e3953	TCGA-37-4135-01A-01D-1352-08	TCGA-37-4135-01A-01D-A320-08	DO26806	#N/A	#N/A
504d4cb0-d2dd-420d-82e6-9ec14434a0fc	22528579-8454-4856-a30f-5f8b792aa3d1	TCGA-21-1076-01A-02D-1521-08	TCGA-21-1076-01A-02D-1521-08	DO26599	#N/A	#N/A
448af8b4-e071-48b0-a65b-b4ad17afdc0c	87a55686-4e8a-4239-9457-7a3eb6d70d7b	TCGA-22-5485-01A-01D-1632-08	TCGA-22-5485-01A-01D-1632-08	DO26553	#N/A	#N/A
84e601b7-dfa5-4cd5-9fef-07f03967a0d4	16004757-44a8-427b-88e9-5f7d32f0c824	TCGA-68-7755-01A-11D-2122-08	TCGA-68-7755-01A-11D-A320-08	DO26512	#N/A	#N/A
b88f014e-bc0f-4775-8228-39e0b471c3b0	c1b25269-7147-4816-85ee-4b038c3c45e7	TCGA-33-4586-01A-01D-1441-08	TCGA-33-4586-01A-01D-A320-08	DO27318	#N/A	#N/A
43aa4123-0fe2-4071-8a81-cbdd0410b917	fbbf064b-8737-45a5-91ca-ed57a2e7c524	TCGA-85-8052-01A-11D-2244-08	TCGA-85-8052-01A-11D-2244-08	DO26459	#N/A	#N/A
a96eddfc-3afb-4bf8-a440-c91778113fbd	c8f286a9-cff0-4604-b235-398d40dc1b30	TCGA-60-2726-01A-01D-1522-08	TCGA-60-2726-01A-01D-1522-08	DO27484	#N/A	#N/A
0bbc7ede-5022-4084-925c-d65baaf7abc2	abff92f8-50d4-4304-8cca-ca7bbbbfae0b	TCGA-56-1622-01A-01D-1521-08	TCGA-56-1622-01A-01D-1521-08	DO26461	#N/A	#N/A
abc94013-71f5-4ac6-88a4-01b4ef9f9d2f	e684c527-6359-417c-a277-16c8658d0d21	TCGA-22-5492-01A-01D-1632-08	TCGA-22-5492-01A-01D-1632-08	DO27208	#N/A	#N/A
25224aa0-cfdd-48ec-92e5-8f3992a3e574	4fcb930e-35f3-4355-a269-40fd7c1f28e9	TCGA-66-2756-01A-01D-1522-08	TCGA-66-2756-01A-01D-1180-08	DO27128	#N/A	#N/A
b7a7d93b-38a7-4fc3-a433-3bb0a8cb7c42	935b00a0-8ccf-421a-88dd-45ccf51398a3	TCGA-96-7545-01A-21D-2042-08	TCGA-96-7545-01A-21D-A320-08	DO26492	#N/A	#N/A
ee6cc68e-8d2a-41ee-82c6-0fecdf7e6259	a0fc81ae-4f7e-4786-93b2-7b62b9cb5b66	TCGA-60-2719-01A-01D-1522-08	TCGA-60-2719-01A-01D-1522-08	DO27453	#N/A	#N/A
96dc785c-8417-4813-8d15-c32b22d78b74	92e210f7-e6c6-43d3-8c74-0a64d514ca0a	TCGA-60-2722-01A-01D-1522-08	TCGA-60-2722-01A-01D-1180-08	DO26798	#N/A	#N/A
71a2b4a2-88dd-4911-a67e-70b3309c4a12	17cf2464-d3eb-43c6-8daa-c60f0888c48c	TCGA-68-8250-01A-11D-2293-08	TCGA-68-8250-01A-11D-2293-08	DO26993	#N/A	#N/A
692dfa4f-45e5-4183-b5da-6650a1fbcabd	0a790cdb-1db1-4574-a20b-06dda75b9c3f	TCGA-34-2596-01A-01D-1522-08	TCGA-34-2596-01A-01D-0963-08	DO26508	#N/A	Missing from representative MAF (2583) syn:syn7364951
369c06f2-8904-49cb-99d1-dd297ed0cd0c	0d20120a-ffca-4851-a31b-724001ce82ff	TCGA-43-5670-01A-21D-2122-08	TCGA-43-5670-01A-21D-A320-08	DO26434	#N/A	#N/A
2fe2433b-9a55-431f-a869-2b5a63e8e8fc	6d4057a6-1713-4582-b88d-c4b22235cdb3	TCGA-52-7812-01A-11D-2122-08	TCGA-52-7812-01A-11D-A320-08	DO27067	#N/A	#N/A
9623d295-c23d-4f2f-827c-69f767a26f1f	a0da38c3-433b-4c8c-977f-7a75cf98df0e	TCGA-66-2789-01A-01D-0983-08	TCGA-66-2789-01A-01D-A320-08	DO27279	#N/A	#N/A
649f2c20-5b50-40a8-a6fd-9a51f3d5b9df	95fb12a3-41c5-4fda-b149-d726d806a062	TCGA-85-8277-01A-11D-2293-08	TCGA-85-8277-01A-11D-2293-08	DO26719	#N/A	#N/A
a762dd44-a8ac-4269-8163-bbf6d0f8d4b3	664ba4c2-902a-428a-b3b4-4ee5c838e701	TCGA-43-3920-01A-01D-0983-08	TCGA-43-3920-01A-01D-1553-08	DO26445	#N/A	#N/A
34881c6b-f59f-42c0-9f29-9c5c47262ae6	5e0e80e3-8cc7-48d6-8902-786dff4819c5	TCGA-18-3415-01A-01D-0983-08	TCGA-18-3415-01A-01D-A320-08	DO26427	#N/A	#N/A
7dc5f8ba-0080-43d3-8426-bd527a970761	b3508abb-3e3b-41d2-9272-d1987157aecb	TCGA-66-2793-01A-01D-1267-08	TCGA-66-2793-01A-01D-1267-08	DO27334	#N/A	#N/A
48f68f73-3ac0-44ac-ba12-b8889fcb7f38	a84218c6-094a-4f4b-b25a-18fef0daf1ca	TCGA-90-7767-01A-11D-2122-08	TCGA-90-7767-01A-11D-A320-08	DO26692	#N/A	#N/A
387c6519-6529-4074-a5ab-00f8052a5732	fb1440e6-338d-47ba-bf63-7c07b832fed9	TCGA-60-2724-01A-01D-1522-08	TCGA-60-2724-01A-01D-1522-08	DO26540	#N/A	#N/A
6962bc97-fbb8-4220-a600-e3c251e245cb	d8c46efd-832a-4af5-ac54-1d453e9b77cf	TCGA-98-8022-01A-11D-2244-08	TCGA-98-8022-01A-11D-2244-08	DO26934	#N/A	#N/A
7731ef7f-25bd-42f5-9a20-be249306a711	f1852b81-a403-4ab6-a2db-ef992b993acf	TCGA-94-7943-01A-11D-2184-08	TCGA-94-7943-01A-11D-A320-08	DO26475	#N/A	#N/A
89c48e53-c8a9-4518-b3b8-509cdcaff52b	a963303f-8704-4646-bf8c-33a68405c814	TCGA-56-7582-01A-11D-2042-08	TCGA-56-7582-01A-11D-A320-08	DO26976	#N/A	#N/A
45e16b70-c3ec-493e-86d1-505ffdf5056c	c8510e3f-90ed-4f7a-b82c-dd87243fb175	TCGA-66-2766-01A-01D-1522-08	TCGA-66-2766-01A-01D-1180-08	DO27747	#N/A	#N/A
e7ebc6fb-0926-4c8a-a67b-0c6b9c1ffaba	bfccaa2c-7129-4303-9676-3a981692f3ab	TCGA-22-5477-01A-01D-1632-08	TCGA-22-5477-01A-01D-1632-08	DO26894	#N/A	#N/A
fab3d6f4-de1c-4d6c-bdea-ac39a7884657	86a22033-0a21-45de-9ffe-f1abbfda42bf	TCGA-77-6843-01A-11D-1945-08	TCGA-77-6843-01A-11D-1945-08	DO27588	#N/A	#N/A
efe4d5dd-fffb-41df-ab86-be06cc16646f	cbf83a02-543b-4b60-ad87-a209d5233507	TCGA-43-3394-01A-01D-0983-08	TCGA-43-3394-01A-01D-1553-08	DO26596	#N/A	#N/A
24badf07-8615-48a3-8d6e-45c3d783f18d	86174bc6-ea71-4b83-bd7b-7bd8cd35457e	TCGA-18-3408-01A-01D-0983-08	TCGA-18-3408-01A-01D-A320-08	DO26572	#N/A	#N/A
e9cb8877-8e83-46c0-93f0-ea20530c9400	7a9faf59-7ced-4f9f-a877-4ba6e506820a	TCGA-34-2600-01A-01D-1522-08	TCGA-34-2600-01A-01D-0963-08	DO27081	#N/A	#N/A
d18c6e64-9598-488a-8ab3-3652072f9277	ee427368-00e9-42df-91fa-c70c7d63892b	TCGA-66-2795-01A-02D-0983-08	TCGA-66-2795-01A-02D-A320-08	DO26710	#N/A	#N/A
0e6654c9-cd5e-4f94-a6d4-54f2bb16de1f	eb2b1358-b0fe-4cc9-9462-ccde176e7157	TCGA-92-8064-01A-11D-2244-08	TCGA-92-8064-01A-11D-2244-08	DO26957	#N/A	#N/A
4c2ad4a0-5d57-4e27-9f35-058b2f205f50	346541b0-c36b-49d2-a4b4-637ed400530f	TCGA-21-5782-01A-01D-1632-08	TCGA-21-5782-01A-01D-1632-08	DO27120	#N/A	#N/A
79eb7bba-f0d8-462c-add7-20a2fb7843e1	7ae322fb-95dd-46da-a811-a07f183c540d	TCGA-60-2713-01A-01D-1522-08	TCGA-60-2713-01A-01D-1522-08	DO26476	#N/A	#N/A
7ac0b303-d685-4fa5-bfec-34d2ba1dbc8e	228c1db6-3d19-4dec-b482-4cb9ca654de4	TCGA-66-2759-01A-01D-1522-08	TCGA-66-2759-01A-01D-A320-08	DO27326	#N/A	#N/A
4c3840df-9824-40db-879e-6d24adc8c155	37561e78-78ba-4eab-97ba-20ea42cf3cd9	TCGA-34-5240-01A-01D-1441-08	TCGA-34-5240-01A-01D-1441-08	DO26563	#N/A	#N/A
ad41f1f3-e38e-4418-9c16-52bca5719f39	b2d013c6-9e54-4ce6-9517-f640433055ed	TCGA-77-7139-01A-11D-2042-08	TCGA-77-7139-01A-11D-A320-08	DO27636	#N/A	#N/A
2045c788-9ea8-4ea5-a5e3-65fc16a62adb	7fb172ab-a66a-4127-959d-68d1a190e743	TCGA-60-2698-01A-01D-1522-08	TCGA-60-2698-01A-01D-1522-08	DO26469	#N/A	#N/A
84ca6ab0-9edc-4636-9d27-55cdba334d7d	797b98c1-bef0-48d1-819f-4c8a5a75b1ca	TCGA-24-1466-01A-01W-0545-08	TCGA-24-1466-01A-01D-A312-08	DO29850	#N/A	#N/A
46f19b5c-3eba-4b23-a1ab-9748090ca4e5	6a5b3f39-e80c-4e4b-940f-13f7e4a97507	TCGA-24-2024-01A-02W-0722-08	TCGA-24-2024-01A-02D-A324-10	DO32237	#N/A	#N/A
a0bbb3b1-e774-4c75-9301-ba43fb803f20	a4cdc50b-3f8a-4bc9-980a-571662de9d41	TCGA-04-1542-01A-01W-0553-09	TCGA-04-1542-01A-01D-A312-08	DO31729	#N/A	#N/A
0ae2193f-0d68-485a-b8c2-7568cbcce33e	6a098b20-65e9-4342-8aec-80c2401d125d	TCGA-13-1477-01A-01D-0472-01	TCGA-13-1477-01A-01D-A312-08	DO27978	#N/A	#N/A
9f335cd1-2736-41be-a02b-cdbe4017bb3d	05b82c4b-a5a5-4d4d-9453-3333b2370769	TCGA-13-0751-01A-01D-0446-08	TCGA-13-0751-01A-01D-0446-08	DO30650	#N/A	Missing from representative MAF (2583) syn:syn7364952
1be8fa2c-8fea-4e8c-90db-c04d9fcdbf49	7e3ba22e-e137-40ac-ad5c-21e86f33dac7	TCGA-24-0982-01A-01W-0486-08	TCGA-24-0982-01A-01D-0516-08	DO32646	#N/A	#N/A
b243adb4-b3e7-4e0e-bc0d-625aa8dbb1be	7fe1e06d-09c0-4ece-8b7f-60469ab6e240	TCGA-61-2000-01A-01W-0722-08	TCGA-61-2000-01A-01D-A324-10	DO29940	#N/A	#N/A
fea5827b-251d-474b-8713-fc76db995fe7	2f50f7ea-ae6a-4c36-acac-b7a30dbb2e09	TCGA-24-2290-01A-01W-0799-08	TCGA-24-2290-01A-01D-A324-10	DO30090	#N/A	#N/A
35ceba07-0759-4fbe-b076-af821a528cf0	9c1809ec-7a8d-4d10-91b5-ac26a1256941	TCGA-04-1367-01A-01W-0492-08	TCGA-04-1367-01A-01D-A324-10	DO30970	#N/A	#N/A
6797443c-eb4a-4654-b957-c0056e5a4206	850fdd0e-d8f1-4677-bc54-b5149ad968f4	TCGA-09-2045-01A-01W-0799-08	TCGA-09-2045-01A-01D-A324-10	DO32420	#N/A	#N/A
7a921087-8e62-4a93-a757-fd8cdbe1eb8f	78b12f40-7cbf-47ec-81fd-10d78dbb9e69	TCGA-09-2050-01A-01W-0799-08	TCGA-09-2050-01A-01D-A312-08	DO31869	#N/A	#N/A
5533240d-8fed-440d-b781-6092785a77ce	a7c426b3-c46c-4ab3-9a82-ed9a5d7401a9	TCGA-04-1349-01A-01W-0492-08	TCGA-04-1349-01A-01D-A324-10	DO29308	#N/A	#N/A
e9d98643-01ee-40c3-a617-e004559625cd	d1ee5427-6202-40f8-a8b8-4a6d495fcf8c	TCGA-24-1562-01A-01W-0553-09	TCGA-24-1562-01A-01D-A312-08	DO28412	#N/A	#N/A
95fc38ac-2b36-4c46-abbf-8d2d52ff9626	ded94369-6271-4235-9292-7af0a5c9da15	TCGA-13-0912-01A-01W-0420-08	TCGA-13-0912-01A-01D-A312-08	DO28289	#N/A	#N/A
d67cad13-e849-48b0-926c-10b6046ba0b9	bafad69b-8557-47d6-beb9-b70318caa5df	TCGA-25-2400-01A-01W-0799-08	TCGA-25-2400-01A-01D-A312-08	DO28053	#N/A	#N/A
2f2eaecc-6509-423f-b63a-8c3bea1ba4a4	4fe197f1-24c4-4fca-a199-c30664566d2b	TCGA-24-1419-01A-01W-0545-08	TCGA-24-1419-01A-01D-A324-10	DO30550	#N/A	#N/A
14ed7388-41ed-43d4-afb2-04cd6410d5d2	531c8fda-9767-4d97-acfb-ecab7e1bb57a	TCGA-24-1552-01A-01W-0551-08	TCGA-24-1552-01A-01D-A324-10	DO31551	#N/A	#N/A
0664753b-7566-41e0-8006-7009c6735406	6486ce65-0ea9-4320-950e-2e35f7eaca4a	TCGA-10-0934-01A-02D-0399-01	TCGA-10-0934-01A-02D-A312-08	DO28873	#N/A	Missing from representative MAF (2583) syn:syn7364953
c9959f68-c385-4c1f-9188-8203844d288e	4424d4a5-d447-483e-9409-f47a892ecda0	TCGA-04-1331-01A-01W-0486-08	TCGA-04-1331-01A-01D-A324-10	DO28119	#N/A	#N/A
33ea81f2-db2c-4567-bd7b-4cb9aadfef88	3b843e07-74b5-4320-b998-5565763aee3f	TCGA-23-1118-01A-01W-0486-08	TCGA-23-1118-01A-01D-A312-08	DO30220	#N/A	#N/A
9a5bb831-8cb8-4de0-b94b-088cb38def1a	239aa85b-2057-45c0-a594-de3688b673ca	TCGA-23-1124-01A-01W-0486-08	TCGA-23-1124-01A-01D-A312-08	DO32596	#N/A	#N/A
1292e13b-d7c6-447b-a227-9a8113215580	3bdcd979-3c14-422c-b8fa-85e465f3857b	TCGA-23-1110-01A-01D-0428-01	TCGA-23-1110-01A-01D-A324-10	DO29398	#N/A	#N/A
8a69f3ca-4e17-4daa-8722-a36316e345ba	101a2f8b-fc3b-4c89-baeb-1218410eb41c	TCGA-10-0937-01A-02W-0420-08	TCGA-10-0937-01A-02D-A324-10	DO28233	#N/A	#N/A
129de5b2-d9b0-4762-9ef8-72d98231fb50	07665988-f81e-4a42-8252-042cde19b802	TCGA-13-1491-01A-01W-0549-09	TCGA-13-1491-01A-01D-A312-08	DO28004	#N/A	#N/A
44eebc04-c027-45ae-beca-c4012b494f29	aa4b0ea6-a9e0-4ef5-9431-e5c44f86024f	TCGA-13-1487-01A-01W-0545-08	TCGA-13-1487-01A-01D-A312-08	DO29760	#N/A	#N/A
8658f4f5-9a50-4195-8ea3-227951977647	313583d1-21b8-429e-a073-ab31641ff887	TCGA-13-0890-01A-01W-0420-08	TCGA-13-0890-01A-01D-0447-09	DO28273	#N/A	#N/A
1dc9e7fd-fc62-4b32-9619-4e02a266a385	eae42588-3494-4874-882d-e5eb2220d0e5	TCGA-04-1347-01A-01W-0486-08	TCGA-04-1347-01A-01D-A324-10	#N/A	Missing from MC3 Public release	#N/A
2c9dc04b-e9ec-4cf1-ab2c-a18edb30dd37	9f120131-b9b9-43de-a7dc-caf937a04eb2	TCGA-24-1103-01A-01W-0488-09	TCGA-24-1103-01A-01D-0515-09	DO28089	#N/A	#N/A
58faf969-bf37-4180-8807-2f44f2cc8eda	9c0bf4ea-16c2-416a-98a4-9ec13ff41788	TCGA-25-2391-01A-01W-0799-08	TCGA-25-2391-01A-01D-A324-10	DO31769	#N/A	#N/A
17ed8831-a261-42d9-8ff3-cf75a6cb2a24	b74b1d41-0c88-4aeb-a2b1-2dc0190d9571	TCGA-13-0723-01A-02W-0371-08	TCGA-13-0723-01A-02D-0447-09	#N/A	syn:syn5877280 Not processed by BROAD F,F	#N/A
7f1ca00a-84ba-4b26-a1a5-4d83c363ac69	43b00994-df9d-4bce-a2bf-433173b39bef	TCGA-HC-7079-01A-11D-1961-08	TCGA-HC-7079-01A-11D-1961-08	DO36352	#N/A	Missing from representative MAF (2583) syn:syn7364954
e1fc4226-40ce-43b7-b92e-aa7cecd0cf4d	34982401-0d0e-4585-8712-411c8becad6d	TCGA-HI-7169-01A-11D-2114-08	TCGA-HI-7169-01A-11D-2114-08	DO36356	#N/A	#N/A
581be6cf-9778-49c3-9c77-1316eaa78929	4073902f-e01c-49f4-b178-d7b2d3ddd447	TCGA-CH-5763-01A-11D-1576-08	TCGA-CH-5763-01A-11D-1576-08	DO36239	#N/A	#N/A
87e1ffee-a8cd-4d75-937e-ed415cf43546	234b0be1-e5dc-4049-8062-6611738b4317	TCGA-CH-5771-01A-21D-1576-08	TCGA-CH-5771-01A-21D-1576-08	DO36254	#N/A	#N/A
d32f41fb-0744-4a62-81f6-0260c4920049	ab956c5c-6e3f-4fd5-ac0c-09e2a749081f	TCGA-EJ-7791-01A-11D-2114-08	TCGA-EJ-7791-01A-11D-2114-08	DO36360	#N/A	#N/A
ab318624-db9d-41d8-b7b8-34712434f28f	9cdea573-c31d-48fd-9020-b0ff6b8baf82	TCGA-G9-6336-01A-11D-1786-08	TCGA-G9-6336-01A-11D-1786-08	DO36372	#N/A	#N/A
ddc422e4-87e2-4fc0-b56b-ddc2d6a92f58	305960df-b353-439f-a176-2f0223270d6a	TCGA-HC-7075-01A-11D-1961-08	TCGA-HC-7075-01A-11D-1961-08	DO36226	#N/A	#N/A
769e2ac9-a121-4b2a-a0fd-5f755b579811	d53c0168-a337-4a5d-90dd-be46cb042cb2	TCGA-G9-6365-01A-11D-1786-08	TCGA-G9-6365-01A-11D-1786-08	DO36345	#N/A	#N/A
dcf98acc-736b-4af6-bdca-a320a413165a	7193f031-1009-4e32-b814-5c884b0859ff	TCGA-HC-7737-01A-11D-2114-08	TCGA-HC-7737-01A-11D-2114-08	DO36285	#N/A	#N/A
f54442d1-80fa-4678-ac94-c3ad03bc37fb	2994c70c-57e9-4968-9aaf-1356cdd3c9ce	TCGA-G9-7522-01A-11D-2260-08	TCGA-G9-7522-01A-11D-2260-08	DO36273	#N/A	#N/A
7303f9fe-88bb-48ba-b9b4-ebf9e4770c1c	172c3b92-0029-411b-8fdb-03ba7c08e434	TCGA-HC-7740-01A-11D-2114-08	TCGA-HC-7740-01A-11D-2114-08	DO36262	#N/A	#N/A
25c002f7-e972-421a-b32d-7dd675d81931	fc4813f0-ac43-4514-ab47-6c44d35374bb	TCGA-EJ-5503-01A-01D-1576-08	TCGA-EJ-5503-01A-01D-1576-08	DO36359	#N/A	#N/A
b68c5ec2-0875-4d77-b4b7-738d2b2f313c	5ac481da-3281-4830-8291-4f7f54641273	TCGA-CH-5789-01A-11D-1576-08	TCGA-CH-5789-01A-11D-1576-08	DO36265	#N/A	#N/A
9e272bea-9193-4c10-a802-f7e18b2937a3	d35041bf-7f1b-4214-9d84-0b4bec89cbea	TCGA-CH-5788-01A-11D-1576-08	TCGA-CH-5788-01A-11D-1576-08	DO36253	#N/A	#N/A
597e4011-ea99-4356-b1d9-8cfe35db7c3b	2f473bd1-1673-4103-ae19-9f8db97c3e24	TCGA-HC-8258-01A-11D-2260-08	TCGA-HC-8258-01A-11D-2260-08	DO49815	#N/A	#N/A
e1b169c3-44e0-43e5-9ee3-2df7a678a5ea	38602a76-84da-4433-9f3c-aeb8794141a5	TCGA-CH-5750-01A-11D-1576-08	TCGA-CH-5750-01A-11D-1576-08	DO36248	#N/A	#N/A
0c9a5dbc-f7f3-43e7-83d1-77b9fb4b8b54	888f1ece-56c5-4878-9cb3-738332c97ac6	TCGA-HC-7233-01A-11D-2114-08	TCGA-HC-7233-01A-11D-2114-08	DO46813	#N/A	#N/A
9f5e6063-d19e-4f56-b3f9-5c2260d3bfc9	9b277d4e-88fa-4848-8ab6-207112c2c8a4	TCGA-EJ-5506-01A-01D-1576-08	TCGA-EJ-5506-01A-01D-1576-08	DO36335	#N/A	#N/A
0192d529-7340-45d8-a5f0-249cbb11ca19	23a139df-0c81-499f-8275-70ce97eccda7	TCGA-HC-7744-01A-11D-2114-08	TCGA-HC-7744-01A-11D-2114-08	DO36283	#N/A	#N/A
9689cb33-8ac9-4ee5-800d-3900769988af	a51d0972-3b8a-4299-b0e0-7993ff4bc07f	TCGA-G9-6370-01A-11D-1786-08	TCGA-G9-6370-01A-11D-1786-08	DO36361	#N/A	#N/A
cd3d7559-b583-4474-81df-4bf9232de3c2	58916a20-0c34-4f19-b16c-358ccb0031dc	TCGA-AG-A032-01A-01W-A00E-09	TCGA-AG-A032-01A-01D-A183-10	DO36945	#N/A	#N/A
8853cbee-7931-49a6-b063-a806943a10ad	61ab13d5-a984-4639-8e5f-a81e5c5242ab	TCGA-EI-6917-01A-11D-1924-10	TCGA-EI-6917-01A-11D-1924-10	DO36881	#N/A	Missing from representative MAF (2583) syn:syn7364955
ecf4e05a-0912-4b93-ad66-323002f0c845	fe6f04da-4486-42f8-98ea-0087e1b912f2	TCGA-AG-3574-01A-01D-1989-10	TCGA-AG-3574-01A-01D-1989-10	DO37267	#N/A	#N/A
aa06ae46-2336-4666-a3af-fc790daf8da4	38955edf-17d9-403d-8493-8a7775e941b9	TCGA-AG-4015-01A-01W-1073-09	TCGA-AG-4015-01A-01D-1989-10	DO36459	#N/A	#N/A
7d59205a-65ec-4341-9748-28639d82ed29	0a18216f-a9c4-4cf2-9c33-3f8cdb8c505d	TCGA-AG-3901-01A-01W-1073-09	TCGA-AG-3901-01A-01D-1989-10	DO36572	#N/A	#N/A
5b180356-cf58-4fad-a3d4-00fc12b43fcc	17793031-ac8b-44c6-9e8d-9c8383699e71	TCGA-AF-2689-01A-01D-1989-10	TCGA-AF-2689-01A-01D-1989-10	DO36822	#N/A	#N/A
428c100f-d7d0-4860-a8fc-2bae6a4bba95	354469be-bfea-44da-bb04-9cfe6ecfa280	TCGA-AG-4008-01A-01W-1073-09	TCGA-AG-4008-01A-01D-1989-10	DO36386	#N/A	#N/A
81b1e78c-6032-4ff4-b52a-83456b9450ea	fd1495de-b17b-4b6a-ad5e-dd79e35bddd0	TCGA-AF-2691-01A-01D-1989-10	TCGA-AF-2691-01A-01D-1989-10	DO36969	#N/A	#N/A
8da641e4-9b12-4163-bd1e-9d5af91e5186	76f591de-0c5a-480a-9607-c35ac2d21dc0	TCGA-AG-4007-01A-01W-1073-09	TCGA-AG-4007-01A-01D-1989-10	#N/A	Missing from MC3 Public release	#N/A
14c5b81d-da49-4db1-9834-77711c2b1d38	31428f5f-aad7-465c-bc2b-9cd2a885d0b7	TCGA-F5-6814-01A-31D-1924-10	TCGA-F5-6814-01A-31D-1924-10	DO36556	#N/A	#N/A
14334aea-2dae-428c-9d4a-1a37878dfc3f	746cef89-3a7b-440d-98fa-08928aef4658	TCGA-AG-3896-01A-01W-1073-09	TCGA-AG-3896-01A-01D-1989-10	DO37259	#N/A	#N/A
03cff38d-7e29-4409-a508-749bddb1b3df	d657cefc-6afd-416e-a0fa-59fe7e27b6ee	TCGA-AG-3890-01A-01W-1073-09	TCGA-AG-3890-01A-01D-1989-10	DO36431	#N/A	#N/A
bb6150f7-23e4-40f2-b466-6b6edd19c502	f5a63e2f-a63c-4f22-9449-00879d6989d5	TCGA-AG-3885-01A-01W-0899-10	TCGA-AG-3885-01A-01D-0967-10	DO36619	#N/A	#N/A
786fc3e4-e2bf-4914-9251-41c800ebb2fa	f556d46f-fe84-420c-ae63-9b93fe161735	TCGA-AG-3727-01A-01W-0899-10	TCGA-AG-3727-01A-01D-1989-10	DO37138	#N/A	#N/A
6aa00162-6294-4ce7-b6b7-0c3452e24cd6	3e6bc04a-51cb-4058-b9cd-1df61f83c3c4	TCGA-IW-A3M4-01A-11D-A21Q-09	TCGA-IW-A3M4-01A-11D-A21Q-09	DO220174	#N/A	#N/A
cb5e1546-cda6-4991-911c-f3dd9f1a475a	05d29528-a867-49e1-8288-d7b302e3ac21	TCGA-FX-A48G-01A-11D-A24N-09	TCGA-FX-A48G-01A-11D-A24N-09	DO220126	#N/A	#N/A
d8f0becd-fda8-41f4-a424-e082f9eae22c	9b663dac-0773-4458-9d2c-59c31680222d	TCGA-IS-A3KA-01A-11D-A21Q-09	TCGA-IS-A3KA-01A-11D-A21Q-09	DO220172	#N/A	#N/A
7d332cb1-ba25-47e4-8bf8-d25e14f40d59	f5b149cc-8a83-49c4-bcd8-2f035cb9e721	TCGA-FX-A2QS-01A-11D-A21Q-09	TCGA-FX-A2QS-01A-11D-A21Q-09	DO220116	#N/A	#N/A
9d691fa3-5c32-4b98-85c4-f6e0fd4c37e0	0f446a56-8b98-46a0-8026-d11b270e72b8	TCGA-DX-A3LW-01A-21D-A21Q-09	TCGA-DX-A3LW-01A-21D-A21Q-09	DO219968	#N/A	#N/A
cb783f8b-d092-4104-b809-3f90b19df7df	b9ddba16-ff53-4c9f-81bb-1cf47a6e5a17	TCGA-DX-A2J0-01A-11D-A21Q-09	TCGA-DX-A2J0-01A-11D-A21Q-09	DO219962	#N/A	#N/A
df4366c4-170f-4233-b577-a8ea277b069c	183af66c-dd39-4f1b-bf6c-01a58e07d292	TCGA-DX-A3LY-01B-11D-A27P-09	TCGA-DX-A3LY-01B-11D-A27P-09	DO219969	#N/A	#N/A
3db6e6cc-1a06-49b9-834e-b6611cde4c4b	fe0b8ddb-c01f-4b3a-a742-617401dad5e6	TCGA-DX-A240-01A-32D-A27P-09	TCGA-DX-A240-01A-32D-A27P-09	DO219960	#N/A	#N/A
075fc96d-6742-4ef3-9369-482592ad3a2f	3ba17ba8-85cf-442f-a698-67b67d5084e3	TCGA-DX-A3LS-01A-11D-A21Q-09	TCGA-DX-A3LS-01A-11D-A21Q-09	DO219965	#N/A	#N/A
d53c2680-89ac-4f87-a7ba-f4c669546b76	17c052a3-8f47-46bb-86e2-979dcdcd4476	TCGA-IF-A4AJ-01A-11D-A24N-09	TCGA-IF-A4AJ-01A-11D-A24N-09	DO220163	#N/A	#N/A
56681386-d407-4f53-ae4f-6c04437652f7	8b327d87-9e88-439c-9655-60410e0abdaa	TCGA-IE-A4EK-01A-11D-A24N-09	TCGA-IE-A4EK-01A-11D-A24N-09	#N/A	Missing from MC3 Public release	#N/A
afee5b10-3dff-4e50-9575-bc9fe20c5dea	d14eb995-71c3-479c-a757-691d2909ecd2	TCGA-IS-A3K7-01A-11D-A21Q-09	TCGA-IS-A3K7-01A-11D-A21Q-09	DO220168	#N/A	#N/A
db650eff-4e2c-4ce3-9124-7697b6e03359	d5cf58a0-7f52-4627-aa87-45fb6c683e67	TCGA-DX-A3U6-01A-11D-A29N-09	TCGA-DX-A3U6-01A-11D-A29N-09	DO219973	#N/A	#N/A
67bb70b2-b6f8-4aa9-80ce-48829f9fec56	d3104edf-1928-4eb7-816e-7fcc390ea764	TCGA-DX-A2IZ-01A-11D-A21Q-09	TCGA-DX-A2IZ-01A-11D-A21Q-09	DO219961	#N/A	#N/A
4c59fb2d-21b6-4b09-8174-6102de736e4d	644a58e8-e4c3-4279-aeca-8abd50aa3451	TCGA-DX-A1L2-01A-22D-A24N-09	TCGA-DX-A1L2-01A-22D-A24N-09	DO219951	#N/A	#N/A
408ed640-75f6-4346-bdd0-3b93c51adae5	e36713fa-f344-4a78-a027-27a0f8e6fe11	TCGA-FX-A3NJ-01A-11D-A21Q-09	TCGA-FX-A3NJ-01A-11D-A21Q-09	DO220118	#N/A	#N/A
cdbbd701-9c05-4f9e-923d-06039dd8a04d	be96929c-f290-4418-9749-524c934e114f	TCGA-FX-A3RE-01A-11D-A228-09	TCGA-FX-A3RE-01A-11D-A228-09	DO220122	#N/A	#N/A
1c188bf5-2c99-4eb4-a774-59c75d53e643	53a3f131-aaed-487d-8f83-257e6b4224ad	TCGA-DX-A1L0-01A-11D-A24N-09	TCGA-DX-A1L0-01A-11D-A24N-09	DO219949	#N/A	#N/A
7a5d3b6b-be5a-4e55-9255-32a069b8af3d	d60edca3-9e41-45fe-aa0c-0748a99ce38d	TCGA-MO-A47R-01A-11D-A24N-09	TCGA-MO-A47R-01A-11D-A24N-09	DO220221	#N/A	#N/A
3c963890-6e79-4b16-a4aa-bac04938b4d7	60c51458-0303-4724-87ff-fa3ce6998997	TCGA-DX-A3U5-01A-11D-A228-09	TCGA-DX-A3U5-01A-11D-A228-09	DO219972	#N/A	#N/A
18ec066e-8510-4921-9e35-45d85fb01e38	09ca3091-cc72-4fdd-9868-09e7d2954691	TCGA-DX-A1L3-01A-11D-A24N-09	TCGA-DX-A1L3-01A-11D-A24N-09	#N/A	Missing from MC3 Public release	#N/A
16d33e09-2e21-4da2-8e57-e78ce28c4408	132aa8f5-393f-4c95-a9e6-0b0e703a62e9	TCGA-HB-A43Z-01A-11D-A24N-09	TCGA-HB-A43Z-01A-11D-A24N-09	DO220138	#N/A	#N/A
35c797fd-ca81-4cef-b6c4-7e3776f661b3	42dae4bb-82c9-40e3-aa4c-4bc641260c80	TCGA-DX-A23R-01A-11D-A26G-09	TCGA-DX-A23R-01A-11D-A26G-09	#N/A	Missing from MC3 Public release	#N/A
72f0a49a-aec8-47e5-846a-956c4da1507c	37e23d02-d8e2-4fbe-b458-bddb1b9d5e75	TCGA-DX-A3M1-01A-11D-A228-09	TCGA-DX-A3M1-01A-11D-A228-09	DO219970	#N/A	#N/A
03ced0ce-186a-4349-8d98-572c2bc90382	8681fa6d-5e8c-47ee-8b9a-39be0534b4a7	TCGA-IW-A3M5-01A-22D-A21Q-09	TCGA-IW-A3M5-01A-22D-A21Q-09	DO220176	#N/A	#N/A
4d4eff82-ede0-47f1-b49a-ada025952114	a05d05f2-62ce-47ef-9a5e-ebb39e2d33fe	TCGA-HB-A5W3-01A-11D-A29N-09	TCGA-HB-A5W3-01A-11D-A29N-09	DO220140	#N/A	#N/A
522dc834-8367-4f49-b93b-fcba91a2de7e	b0b71404-e312-4d05-8cd5-68fd7aaab12a	TCGA-IE-A4EI-01A-11D-A24N-09	TCGA-IE-A4EI-01A-11D-A24N-09	DO220153	#N/A	#N/A
63db50d6-5ef2-44d0-9906-26eae74ecf44	05fda367-fa87-4f85-9ef1-43bc918c5924	TCGA-DX-A1KW-01A-22D-A24N-09	TCGA-DX-A1KW-01A-22D-A24N-09	DO219945	#N/A	#N/A
729229fe-92b9-439b-acd2-b49159116a41	75779a42-5180-4b31-9835-a77abd816f21	TCGA-DX-A3U8-01A-11D-A29N-09	TCGA-DX-A3U8-01A-11D-A29N-09	DO219975	#N/A	#N/A
7d734d06-f2b1-4924-a201-620ac8084c49	7340aa6e-5885-4e89-92a3-b4aeed2b1272	TCGA-DX-A3LU-01A-11D-A21Q-09	TCGA-DX-A3LU-01A-11D-A21Q-09	DO219967	#N/A	#N/A
a2f02ff7-8433-4cb5-9324-34f13edeaca1	b407bf27-ee74-406e-9d67-ec61352ff103	TCGA-DX-A3LT-01A-12D-A21Q-09	TCGA-DX-A3LT-01A-12D-A21Q-09	#N/A	Missing from MC3 Public release	#N/A
c556f81b-8a6c-4bbb-876f-2e2ce570c185	072a96c6-6620-48d8-9bf4-a1fc7de66540	TCGA-DX-A1KU-01A-32D-A24N-09	TCGA-DX-A1KU-01A-32D-A24N-09	DO219944	#N/A	#N/A
9e7b51fb-2249-451a-bf23-bb2a3d935928	faa3fea3-7b5c-46d3-bcb8-c884310965ef	TCGA-DX-A3U7-01A-11D-A29N-09	TCGA-DX-A3U7-01A-11D-A29N-09	DO219974	#N/A	#N/A
968929b0-6bfb-4a2c-bd4d-570bfcdb8a6a	fd126214-f06b-4d13-8f44-d161725ce5ba	TCGA-DX-A2J4-01A-32D-A21Q-09	TCGA-DX-A2J4-01A-32D-A21Q-09	DO219964	#N/A	#N/A
d432e99a-67fb-4609-b90f-99438eee7cae	c07eb72c-68ed-4ce1-8c56-7040d1f8e1cb	TCGA-DA-A1I2-06A-21D-A19A-08	TCGA-DA-A1I2-06A-21D-A19A-08	DO37758	#N/A	#N/A
41a7b031-d928-4a1f-891b-82fb3f6d548f	09b2bed4-5426-4673-ab0c-c5e891b6c945	TCGA-FS-A1ZK-06A-11D-A197-08	TCGA-FS-A1ZK-06A-11D-A197-08	DO37474	#N/A	#N/A
75ba6722-1148-4a52-a9ed-68d890238205	13338172-86cd-481f-be14-91eece9795bb	TCGA-DA-A1HV-06A-21D-A196-08	TCGA-DA-A1HV-06A-21D-A196-08	DO37659	#N/A	#N/A
04c09376-8756-41d9-bbca-f464170a8cfb	b699068f-18eb-447f-bd84-d1788d480c2f	TCGA-D3-A1Q5-06A-11D-A196-08	TCGA-D3-A1Q5-06A-11D-A196-08	DO37827	#N/A	#N/A
0dd0718d-5ddf-4c59-8c47-0f51303daeb5	d5480948-3a8e-428d-add9-88084ddc9140	TCGA-EE-A3JI-06A-11D-A21A-08	TCGA-EE-A3JI-06A-11D-A21A-08	DO47268	#N/A	#N/A
c21a5d55-9790-429f-a4e6-420293c07b53	5b8a7d13-cdbd-49a7-825d-72eb49035dce	TCGA-ER-A19D-06A-11D-A197-08	TCGA-ER-A19D-06A-11D-A197-08	DO37750	#N/A	#N/A
04aa6b77-8074-480c-872e-a1a47afa5314	75651275-5621-4b74-b286-7ee4d7a1ad5a	TCGA-GN-A266-06A-11D-A197-08	TCGA-GN-A266-06A-11D-A197-08	DO37432	#N/A	#N/A
507620ef-f0fc-4ac3-a7c0-ea2e36c40f77	ef86ec3f-b6ab-48f0-b497-a6c426baeb49	TCGA-DA-A3F3-06A-11D-A20D-08	TCGA-DA-A3F3-06A-11D-A20D-08	DO37607	#N/A	#N/A
54a77010-2f16-4da9-8ca0-746a51801a00	91f9937c-f25b-450b-8f09-489e421a071b	TCGA-ER-A19E-06A-11D-A197-08	TCGA-ER-A19E-06A-11D-A197-08	DO47542	#N/A	#N/A
88f2c496-3eb4-4c03-b3a5-8d5a55803aaf	b1d4071d-5b7e-4f36-a478-c11229bccd66	TCGA-DA-A1HY-06A-11D-A19A-08	TCGA-DA-A1HY-06A-11D-A19A-08	DO37409	#N/A	#N/A
66d312fc-809d-428b-98e3-a29d211db35c	a1078747-2821-48ca-95eb-9b8cbaed1401	TCGA-FS-A1ZP-06A-11D-A197-08	TCGA-FS-A1ZP-06A-11D-A197-08	DO37703	#N/A	#N/A
22edd867-dcd6-42b5-92bb-025ceb84b106	3ba71f7c-6e1e-4866-9163-8c5f27306b7e	TCGA-GN-A26A-06A-11D-A19A-08	TCGA-GN-A26A-06A-11D-A19A-08	DO37861	#N/A	#N/A
8d5ffe62-6dd9-4764-b0b7-5e3010eefe6d	5c78a1ac-abe2-46a5-b47f-273a8e292c53	TCGA-ER-A19L-06A-12D-A197-08	TCGA-ER-A19L-06A-12D-A197-08	DO37587	#N/A	#N/A
6920fd0a-82bb-43a4-bc78-c29c42961148	0512a997-9b57-4e9c-a34c-053d1efc7398	TCGA-DA-A1IC-06A-11D-A197-08	TCGA-DA-A1IC-06A-11D-A197-08	DO37430	#N/A	Missing from representative MAF (2583) syn:syn7364956
d0e033bc-8e97-4322-b3b1-8626f1e2449b	b3156a4c-2489-44af-8402-ca7004ef43c7	TCGA-DA-A1I0-06A-11D-A20D-08	TCGA-DA-A1I0-06A-11D-A20D-08	DO37719	#N/A	#N/A
450e8eba-a3a9-4dcb-b423-e33dfcd5c34e	890b67e6-d078-4730-8058-a9ace5bbc22b	TCGA-GN-A264-06A-11D-A196-08	TCGA-GN-A264-06A-11D-A196-08	DO37527	#N/A	#N/A
64dd81e1-35fa-4579-8a4c-f7486adbb949	d95a5af7-c9b6-48bf-a19d-1befc7d7f510	TCGA-DA-A1I8-06A-11D-A197-08	TCGA-DA-A1I8-06A-11D-A197-08	DO37424	#N/A	#N/A
fe8c62a6-c113-46e8-ab91-fdb90bb6a59f	ff4db2a7-c89a-46d8-81e0-e9312a3142e2	TCGA-FS-A1ZU-06A-12D-A196-08	TCGA-FS-A1ZU-06A-12D-A196-08	DO37723	#N/A	#N/A
fc249113-83d4-4abe-8c80-a4f7305dcd91	700a17e9-3324-4f99-9adc-b630bf495a4f	TCGA-DA-A1HW-06A-11D-A19A-08	TCGA-DA-A1HW-06A-11D-A19A-08	DO38129	#N/A	#N/A
3f2ecbcd-5c9e-4d57-8aa5-962e2e86a83c	28e1e745-bd01-43f1-9d01-4b0d4edb26a6	TCGA-EE-A2A0-06A-11D-A196-08	TCGA-EE-A2A0-06A-11D-A196-08	DO37439	#N/A	#N/A
affa4ef4-02ec-40f1-b6a2-739f8bf2afa9	dc36f261-3241-48b0-a62c-418f3d12e8f2	TCGA-D3-A3MO-06A-11D-A21A-08	TCGA-D3-A3MO-06A-11D-A21A-08	DO37427	#N/A	#N/A
a0583407-712d-46f3-8c4e-4eeaa0149087	b97134ce-946b-49cf-920c-c18c02106a3b	TCGA-D3-A1Q1-06A-21D-A196-08	TCGA-D3-A1Q1-06A-21D-A196-08	DO37445	#N/A	#N/A
fa4d35e3-fc38-4e26-a9e0-521a648acec1	15618c58-0053-4714-91ab-c7cc0f372fce	TCGA-EE-A29B-06A-11D-A197-08	TCGA-EE-A29B-06A-11D-A197-08	DO47255	#N/A	#N/A
5310f698-d31a-4628-84b4-dc9ac29722a5	81a226b8-b6d0-4b89-8f39-e6c32bfa6ecd	TCGA-EE-A2GT-06A-12D-A197-08	TCGA-EE-A2GT-06A-12D-A197-08	DO37946	#N/A	#N/A
d056645f-4dd3-49f3-b0a4-2293e2b4d82c	1b527acd-ce54-4816-8ee9-45751f0c366f	TCGA-EE-A185-06A-11D-A196-08	TCGA-EE-A185-06A-11D-A196-08	DO37599	#N/A	#N/A
3869ff3f-21b9-4817-8ff4-83c6fc75ab11	7414d60d-e0c2-464d-bdb6-a0b9b94e575d	TCGA-EE-A2M5-06A-12D-A197-08	TCGA-EE-A2M5-06A-12D-A197-08	DO37425	#N/A	#N/A
978ae91e-6ebe-4efa-97ff-cfad511ae7b3	04991088-d8e8-47b4-83f4-442d59eb1ce1	TCGA-DA-A3F8-06A-11D-A20D-08	TCGA-DA-A3F8-06A-11D-A20D-08	DO37418	#N/A	#N/A
3f98d326-5676-4257-9af8-0a5f5d3c2527	c01332ec-7430-470b-ad8e-120856013a96	TCGA-ER-A19T-06A-11D-A19A-08	TCGA-ER-A19T-06A-11D-A19A-08	DO51251	#N/A	#N/A
10bb1a92-901e-4a14-80f4-5e88f997754b	dc840f93-9d26-42f4-9918-278c7aeeb64f	TCGA-EE-A2GN-06A-11D-A196-08	TCGA-EE-A2GN-06A-11D-A196-08	DO37896	#N/A	#N/A
6507e084-c038-4ba6-a431-fb9a53190d5f	cacde571-5bac-4279-ba8d-47ed3966e8c4	TCGA-EE-A2MI-06A-11D-A197-08	TCGA-EE-A2MI-06A-11D-A197-08	DO37531	#N/A	#N/A
8ea666b7-2b6e-4df8-9a9d-b8265b9749b4	469796a7-fe3c-4a2b-a116-268f38b36bfe	TCGA-FS-A1ZD-06A-11D-A197-08	TCGA-FS-A1ZD-06A-11D-A197-08	DO37627	#N/A	#N/A
d053f88f-09e6-472e-a691-bb293c461399	90d05640-d96d-4c34-969c-59964a960534	TCGA-ER-A19J-06A-11D-A196-08	TCGA-ER-A19J-06A-11D-A196-08	DO37426	#N/A	#N/A
15daadb0-6b24-4248-9225-470dc08f1552	a2ce798f-00a6-438c-a337-c2c84ecb63af	TCGA-ER-A2NF-06A-11D-A19A-08	TCGA-ER-A2NF-06A-11D-A19A-08	DO47451	#N/A	#N/A
b07bad52-d44c-4b27-900a-960985bfadec	be7f8f8c-f54b-442d-badb-66957f1f3c7e	TCGA-EE-A3J5-06A-11D-A20D-08	TCGA-EE-A3J5-06A-11D-A20D-08	DO47331	#N/A	#N/A
6c884037-49f9-41c3-b0e5-9cbcd545aeb7	cc09b079-3195-4ec1-98e7-bd91a2e26b85	TCGA-EB-A24D-01A-11D-A197-08	TCGA-EB-A24D-01A-11D-A197-08	DO37440	#N/A	#N/A
14630c19-9ee0-4ab3-9d8b-8c3309d1e7d0	05f3932a-6849-4b54-8218-4aa8a5f57be3	TCGA-DA-A3F5-06A-11D-A20D-08	TCGA-DA-A3F5-06A-11D-A20D-08	DO37435	#N/A	#N/A
2399ab13-abfa-480e-9fda-7947edc420be	8109f0b7-8682-4edc-9cfd-642ebdf30535	TCGA-GN-A262-06A-11D-A196-08	TCGA-GN-A262-06A-11D-A196-08	DO37515	#N/A	#N/A
e2774050-1257-4c29-b201-d79ce70fe17e	52f49b1c-ed99-47c1-ac1e-4e879a957b80	TCGA-GN-A26C-01A-11D-A19A-08	TCGA-GN-A26C-01A-11D-A19A-08	DO37782	#N/A	#N/A
c1b44966-0f72-4c4f-8783-ab3ffe7f17b2	e36c02b3-027c-4cc9-8a0d-50213eb3d8c1	TCGA-CD-5802-01A-11D-1600-08	TCGA-CD-5802-01A-11D-1600-08	DO38871	#N/A	#N/A
6dac8ca0-f776-4ea2-85c4-aefba4966be7	7f023450-438e-4dee-b33d-ad81a9f55b88	TCGA-CG-5724-01A-11D-1600-08	TCGA-CG-5724-01A-11D-1600-08	DO38847	#N/A	#N/A
ffb4f42b-58e9-40c3-8963-11804f041375	f968fc04-8e69-430c-bb2d-869535425b90	TCGA-CG-5723-01A-11D-1600-08	TCGA-CG-5723-01A-11D-1600-08	DO38376	#N/A	Missing from representative MAF (2583) syn:syn7364957
c612570a-881d-421f-98b9-0e4563133744	1a258e6f-1ed1-4f31-a44f-a3cd33cc0d61	TCGA-BR-6456-01A-11D-1800-08	TCGA-BR-6456-01A-11D-1800-08	DO38655	#N/A	#N/A
429aad6f-816d-4739-baa3-b0ebf2fcd501	0e07821d-f286-4ccf-84a6-aa2e6eb126ac	TCGA-D7-8570-01A-11D-2340-08	TCGA-D7-8570-01A-11D-2340-08	DO48040	#N/A	#N/A
c8e961b4-e324-40a2-89f6-736ec3845bc9	89d0ec64-ba7e-471b-b181-b983faabfe3e	TCGA-BR-6452-01A-12D-1800-08	TCGA-BR-6452-01A-12D-1800-08	DO38404	#N/A	#N/A
ea1cac20-88c1-4257-9cdb-d2890eb2e123	bc971b8a-da5f-4770-80c4-498cdfcc0187	TCGA-F1-6875-01A-11D-2053-08	TCGA-F1-6875-01A-11D-2053-08	DO38731	#N/A	#N/A
a4c838df-6ac4-455a-8096-8ec680064374	48bf0896-d3c2-44ca-803c-c44e9401e37b	TCGA-D7-A4YX-01A-11D-A25D-08	TCGA-D7-A4YX-01A-11D-A25D-08	DO47997	#N/A	#N/A
feccee20-a62d-4152-b832-b9fdaca87a61	b11cdcb0-9649-4c28-8079-1397a8c4c2b0	TCGA-EQ-5647-01A-01D-1600-08	TCGA-EQ-5647-01A-01D-1600-08	DO38807	#N/A	#N/A
c79ce3d3-4758-4f52-9da1-38f994c99f4e	9eb43622-bcfb-4465-ab5e-865ac11fd104	TCGA-HU-A4G6-01A-11D-A24D-08	TCGA-HU-A4G6-01A-11D-A24D-08	DO47747	#N/A	#N/A
edc8839f-fa6b-41e0-ad49-f688073730bd	1cb799ec-9a8c-4d81-ab26-716e6bd6d85f	TCGA-BR-8690-01A-11D-2394-08	TCGA-BR-8690-01A-11D-2394-08	DO47911	#N/A	#N/A
153a64ee-6322-4f2e-b3df-77ef7d3a4cf0	f12d0c35-56e8-4669-8674-c633328be986	TCGA-D7-6528-01A-11D-1800-08	TCGA-D7-6528-01A-11D-1800-08	DO38547	#N/A	#N/A
5c4b369c-51a3-4ca7-8b9d-2a8e49c0dde7	60ca0cf9-c80c-42dd-a6b4-fd77b7c1fb5b	TCGA-CG-4474-01A-02D-1158-08	TCGA-CG-4474-01A-02D-A290-08	DO38535	#N/A	#N/A
19406c86-dd55-420c-b6d4-b5ca9d3bfed6	3cd58edb-379b-4b9e-871e-079f975e5fb7	TCGA-D7-6518-01A-11D-1800-08	TCGA-D7-6518-01A-11D-1800-08	DO38519	#N/A	Missing from representative MAF (2583) syn:syn7364958
61cad26a-cbc6-4977-83b9-dc61e49f2861	065dbad3-0694-4c77-95ec-575833f6c1a7	TCGA-HU-8245-01A-11D-2340-08	TCGA-HU-8245-01A-11D-2340-08	DO47929	#N/A	#N/A
9536f736-63bc-4099-bd54-740f5910f4a8	05cced96-6f9b-4369-8a2c-44181bb62b7a	TCGA-D7-6815-01A-11D-1882-08	TCGA-D7-6815-01A-11D-1882-08	DO38603	#N/A	#N/A
931b24da-5d6d-4c2d-8de9-ef32d6eb8565	9c4e5785-3de2-4850-ab72-5a6afe097d00	TCGA-CD-8529-01A-11D-2340-08	TCGA-CD-8529-01A-11D-2340-08	DO47753	#N/A	#N/A
1f2a8889-4374-4037-bb56-0f20733380e3	f51cc4c3-0312-4542-839b-fb1d1bbcd683	TCGA-BR-8373-01A-11D-2340-08	TCGA-BR-8373-01A-11D-2340-08	DO47859	#N/A	#N/A
622eaa04-b8f9-471b-98b0-7befd119f14c	cd21255b-d05e-429e-8492-cb1401cd170e	TCGA-HF-7136-01A-11D-2053-08	TCGA-HF-7136-01A-11D-2053-08	DO38226	#N/A	#N/A
576a1741-8c65-40da-9f0f-b2ca805d70f3	8ed74ed1-26c4-49a8-8e5c-97e767be7f99	TCGA-IN-7806-01A-11D-2053-08	TCGA-IN-7806-01A-11D-2053-08	DO38831	#N/A	#N/A
2c316b7e-6a82-4ba1-9f34-d8bfcf82d41e	818077e3-9e7f-4581-b35d-6ac35230f54d	TCGA-BR-A4J4-01A-12D-A25D-08	TCGA-BR-A4J4-01A-12D-A25D-08	DO38671	#N/A	#N/A
3db3b7b1-da1d-4b9c-a92a-c60fecf4328c	6dc620c7-a190-4bf7-93bf-82b1a1e395b0	TCGA-D7-5579-01A-01D-1600-08	TCGA-D7-5579-01A-01D-1600-08	DO38571	#N/A	#N/A
d8d5585d-32cd-4ac4-b410-a4122a17a558	8e64ab39-76b3-46f8-96cd-779c44d65804	TCGA-CG-4443-01A-01D-1158-08	TCGA-CG-4443-01A-01D-A290-08	DO38779	#N/A	#N/A
0fa9cfba-0f49-47d0-ab54-9dd2144e0a73	b12a3f53-1ff3-4f2e-b71b-89c8f6435d43	TCGA-BR-7722-01A-31D-2201-08	TCGA-BR-7722-01A-31D-2201-08	DO38388	#N/A	#N/A
7e305f31-fbb0-4bce-894b-1dd85e303421	3ef698fd-b101-4e72-91a3-679f43751d56	TCGA-CG-4442-01A-01D-1158-08	TCGA-CG-4442-01A-01D-A290-08	DO38380	#N/A	#N/A
0cd60b96-eb2d-4687-9709-d1455ec45de7	1759534f-7bd3-48df-8d84-68a3bef255d0	TCGA-BR-4255-01A-01D-1126-08	TCGA-BR-4255-01A-01D-A290-08	DO38791	#N/A	#N/A
d6738c83-7b52-4224-846a-67bd085aaab8	9b112eba-89bb-4b2f-8806-7898cf686be0	TCGA-BR-8381-01A-11D-2394-08	TCGA-BR-8381-01A-11D-2394-08	DO47817	#N/A	#N/A
2e66eb75-097c-4ad8-b2b3-9f5849dfd02f	6f874ce2-3722-4094-9e15-08ae6c74cac4	TCGA-BR-6564-01A-12D-1882-08	TCGA-BR-6564-01A-12D-1882-08	DO38229	#N/A	#N/A
172c9864-c26d-4e9b-947a-e8ce761e996d	ff01f213-b1ac-4423-89b3-017eb892898e	TCGA-FP-7998-01A-11D-2201-08	TCGA-FP-7998-01A-11D-2201-08	DO38190	#N/A	#N/A
6a7cdaf6-211e-4eb8-a70e-1153d69c45e4	6be2696d-3c73-4529-8e45-de449f2b90cb	TCGA-BR-8486-01A-31D-2394-08	TCGA-BR-8486-01A-31D-2394-08	DO47863	#N/A	#N/A
1d0617e8-2725-4411-b50f-e46ea1d43242	0fb00771-ecfd-499d-891a-a6d3ca8161c4	TCGA-F1-6177-01A-11D-1800-08	TCGA-F1-6177-01A-11D-1800-08	DO38727	#N/A	Missing from representative MAF (2583) syn:syn7364959
a2ee5dde-4342-4e78-88c5-3c9a8e10cbf5	ba9306a6-0fe6-4e58-a3d9-0bcb71b3fdce	TCGA-HU-8608-01A-11D-2394-08	TCGA-HU-8608-01A-11D-2394-08	DO47841	#N/A	#N/A
eb59b79f-bd36-4bf4-83e3-2af73bd1d30a	79c80556-4997-413a-988b-6118d1b91f87	TCGA-CD-5799-01A-11D-1600-08	TCGA-CD-5799-01A-11D-1600-08	DO38775	#N/A	#N/A
dc537fcf-d910-4c4b-8af9-e7da429f2633	d7c197bb-6aab-4bef-b778-dfc83e0ef816	TCGA-D7-6527-01A-11D-1800-08	TCGA-D7-6527-01A-11D-1800-08	DO38635	#N/A	#N/A
ea2055d1-7b8b-4aaf-9a70-8802f4deef9b	ac81863b-b28c-4efd-99c4-65fdef07659f	TCGA-BR-8682-01A-11D-2394-08	TCGA-BR-8682-01A-11D-2394-08	DO47737	#N/A	#N/A
388a8875-c3f5-494e-8456-28be8d3626e1	032847fc-c665-407a-91dd-011093cb9042	TCGA-BR-4280-01A-01D-1126-08	TCGA-BR-4280-01A-01D-A290-08	DO38663	#N/A	#N/A
1021b60d-f7b2-43b0-b2cc-f282d619d533	6587805f-be47-464d-a4fc-5c5bc9739d12	TCGA-D7-6822-01A-11D-1882-08	TCGA-D7-6822-01A-11D-1882-08	DO38423	#N/A	#N/A
a2e67393-50d7-4bcc-9bbd-c695086a936a	032f1bcf-2e92-4594-89b3-1ecc6ef06729	TCGA-D7-6519-01A-11D-1800-08	TCGA-D7-6519-01A-11D-1800-08	DO38238	#N/A	#N/A
7116cc90-f465-4e7e-aa27-48a83ed258e9	f1be4093-a1d9-47dd-87ef-684b9e976bf9	TCGA-HU-A4H0-01A-11D-A25D-08	TCGA-HU-A4H0-01A-11D-A25D-08	DO47785	#N/A	#N/A
07a7c634-bd9a-4fc2-b9fe-87b060ec3d1f	2ed2f7a0-fc72-4a32-a85c-25bdb4588465	TCGA-DE-A3KN-01A-11D-A20C-08	TCGA-DE-A3KN-01A-11D-A20C-08	DO39910	#N/A	#N/A
248fd0ed-f14c-40b8-9f14-e9c7adf16e22	9731455b-3c17-4ead-ba56-d76837f461b0	TCGA-EM-A3AL-01A-11D-A202-08	TCGA-EM-A3AL-01A-11D-A202-08	DO48159	#N/A	#N/A
64c2e6a0-2341-49c4-a6dd-656e7bb505dd	491a1bcf-e951-4dbd-be00-2970decd9ff7	TCGA-BJ-A191-01A-11D-A13W-08	TCGA-BJ-A191-01A-11D-A13W-08	DO40167	#N/A	#N/A
4bae2f08-da75-4991-acb8-5ba9912f9131	3a8f4ba1-ed91-4455-a547-fe658284f3e7	TCGA-EM-A3FR-01A-11D-A21Z-08	TCGA-EM-A3FR-01A-11D-A21Z-08	DO48103	#N/A	#N/A
b8cd6882-be27-4742-bc63-3227d31bf704	a2c0dbfd-1088-42ac-b5d8-7dacd4d54c51	TCGA-EM-A2CP-01A-11D-A17V-08	TCGA-EM-A2CP-01A-11D-A17V-08	DO39046	#N/A	#N/A
5bdca282-c671-48ff-b32b-2380996016c0	2c28ca3c-7b96-470d-bf9a-97775aeab62f	TCGA-FE-A3PD-01A-11D-A21Z-08	TCGA-FE-A3PD-01A-11D-A21Z-08	DO40193	#N/A	#N/A
0c18a8b7-bad1-4aa4-a6df-472f89d9761c	0c2bd355-a228-450c-a34a-0f2c4d828710	TCGA-DJ-A13W-01A-11D-A10S-08	TCGA-DJ-A13W-01A-11D-A10S-08	DO40664	#N/A	#N/A
3f039593-91d1-43cb-a06b-41e92f7e8d20	875932b9-9180-4744-b70d-b272bb0b8278	TCGA-DJ-A13R-01A-11D-A10S-08	TCGA-DJ-A13R-01A-11D-A10S-08	DO39841	#N/A	#N/A
5c02d399-07af-4573-a568-bc1b256bc8f8	dcae6533-8466-4161-b48d-e11b750e41e4	TCGA-EM-A2CN-01A-11D-A19J-08	TCGA-EM-A2CN-01A-11D-A19J-08	DO39886	#N/A	#N/A
66eb4833-1b87-4fd9-a53d-26dc7ad6de29	2408d6dd-1004-43c7-bb89-bff24fb58402	TCGA-EL-A4K6-01A-12D-A257-08	TCGA-EL-A4K6-01A-12D-A257-08	DO38899	#N/A	#N/A
2dfe70fd-2650-49c0-b6eb-67df585d063b	4b3bc792-c633-4fba-be76-dfaf547616dd	TCGA-EM-A2OV-01A-11D-A202-08	TCGA-EM-A2OV-01A-11D-A202-08	DO39684	#N/A	#N/A
29578759-9ccb-4a24-b5b8-c45ebd4339d9	61f06224-f5ec-4767-a32c-ba85a3760a4e	TCGA-FK-A3SD-01A-11D-A22D-08	TCGA-FK-A3SD-01A-11D-A22D-08	DO39210	#N/A	#N/A
788fbfaa-51bf-42a4-afa6-5b87ed04c2d5	050e1a60-94b2-4af4-929c-689458b1141c	TCGA-EM-A2CU-01A-12D-A17V-08	TCGA-EM-A2CU-01A-12D-A17V-08	DO39246	#N/A	Missing from representative MAF (2583) syn:syn7364960
13642cf8-9840-4a7d-a26a-95f65b2c70c3	a5c33c7e-de62-4164-baed-ab510b13ff72	TCGA-EM-A22O-01A-11D-A17V-08	TCGA-EM-A22O-01A-11D-A17V-08	DO38911	#N/A	#N/A
ad874249-9964-4e48-aa3f-7e828ea28f3f	01f3bf84-b4c6-4ff6-b81b-4b5b0b7e4613	TCGA-DJ-A3US-01A-11D-A22D-08	TCGA-DJ-A3US-01A-11D-A22D-08	DO39216	#N/A	#N/A
178d0486-cb0d-4979-8bdf-bb3fe99149bd	804f35e5-7df0-4dc6-860e-7c416dcd48f9	TCGA-ET-A4KN-01A-11D-A257-08	TCGA-ET-A4KN-01A-11D-A257-08	DO39072	#N/A	#N/A
a9c29edd-2ef1-46ef-93c6-796cf0332a2b	a9835310-8495-412b-a07b-174df78c21cb	TCGA-EL-A3MY-01A-11D-A21A-08	TCGA-EL-A3MY-01A-11D-A21A-08	DO39610	#N/A	#N/A
fc812906-d3b6-4210-a842-96f095280cbf	e511481c-5eb7-461e-a2d6-320e89c486a2	TCGA-DE-A2OL-01A-11D-A18F-08	TCGA-DE-A2OL-01A-11D-A18F-08	DO38978	#N/A	#N/A
15abb2a3-10a2-4e04-8eb9-6eadbd976af0	1e755b86-d2b5-4f21-8aae-98670af50927	TCGA-FK-A3S3-01A-11D-A22D-08	TCGA-FK-A3S3-01A-11D-A22D-08	DO39127	#N/A	#N/A
8845fce6-e2b4-4929-942b-57096b0bbafc	8fe95f8f-5b33-458b-bbb5-b729a54245b5	TCGA-FE-A22Z-01A-11D-A17V-08	TCGA-FE-A22Z-01A-11D-A35R-08	DO39847	#N/A	#N/A
54426b1a-e0d3-4d8e-9e81-2d8e6b153b22	23d431de-77f7-4a55-a890-eb2aa716e0d5	TCGA-EL-A3T0-01A-22D-A22D-08	TCGA-EL-A3T0-01A-22D-A22D-08	DO40759	#N/A	#N/A
c8381701-31cb-465a-bdf2-1b8132be7a14	6c3c9749-d4af-4d63-8ea1-3844e556d7d8	TCGA-E8-A416-01A-11D-A23M-08	TCGA-E8-A416-01A-11D-A23M-08	DO39564	#N/A	#N/A
d692ecd0-2433-426b-9af2-a30c44a80f7c	dc67c24d-52f5-4eab-8fc6-dd14f1e1b028	TCGA-EL-A3T9-01A-21D-A22D-08	TCGA-EL-A3T9-01A-21D-A22D-08	DO39635	#N/A	#N/A
77ebe6d2-6537-49d3-849d-fe93e2cf52af	591641ef-edf9-42dc-ad0e-8b04055c9f81	TCGA-BJ-A45K-01A-11D-A23U-08	TCGA-BJ-A45K-01A-11D-A23U-08	DO48084	#N/A	#N/A
62fceb56-8c6e-4d20-9d2f-5b7042854d23	ad5ae127-56d1-4419-9dc9-f9385c839b99	TCGA-EL-A3H1-01A-11D-A21A-08	TCGA-EL-A3H1-01A-11D-A21A-08	DO39016	#N/A	#N/A
d0a33fd2-085c-488b-b843-2ca97c85a5cb	35ad486f-e165-46c7-8954-3fef6c00e9dc	TCGA-EL-A3CX-01A-11D-A19J-08	TCGA-EL-A3CX-01A-11D-A19J-08	DO40735	#N/A	#N/A
565e656c-d5e3-4fe4-a10c-2e9ca1e498b5	d01ee386-8c4c-4d27-9547-633eca572646	TCGA-DJ-A2Q2-01A-11D-A19J-08	TCGA-DJ-A2Q2-01A-11D-A19J-08	DO40405	#N/A	#N/A
0567d3e6-6278-4d0a-81ae-c084d73c6dd3	510a2451-a4d5-4a52-921d-4d8f4044f517	TCGA-EL-A3TB-01A-11D-A22D-08	TCGA-EL-A3TB-01A-11D-A22D-08	DO38901	#N/A	#N/A
17a66d24-de77-4f2a-a8ad-d2c6a69e7671	81ef3421-a1e8-478d-8288-c4e1c249fd1f	TCGA-EM-A2OW-01A-11D-A202-08	TCGA-EM-A2OW-01A-11D-A202-08	DO39956	#N/A	#N/A
1d97ba51-d981-4986-9f71-c2b6cb9961c3	a2e15e82-e69b-48dd-9726-c0296a0d4f55	TCGA-BJ-A28T-01A-11D-A16O-08	TCGA-BJ-A28T-01A-11D-A33C-08	DO39062	#N/A	#N/A
64a17d5b-8f40-4ccf-8f2f-e68c5fe6b1ff	1727ac76-d653-4a7f-bb23-c2abc64fd9f8	TCGA-DJ-A4UT-01A-11D-A257-08	TCGA-DJ-A4UT-01A-11D-A257-08	DO40069	#N/A	#N/A
90883300-d4b6-45d7-af9a-4e4ce4104500	6f25f210-2c68-4da4-a680-2b1e7c74520f	TCGA-FK-A3SE-01A-11D-A22D-08	TCGA-FK-A3SE-01A-11D-A22D-08	DO39798	#N/A	#N/A
e7335a24-e5fc-4558-9eba-511c5a802320	9476417a-39dc-4820-8b29-d542b3c54fd0	TCGA-FY-A2QD-01A-11D-A19J-08	TCGA-FY-A2QD-01A-11D-A19J-08	DO39020	#N/A	#N/A
5deeaa45-4c1b-4ab2-a487-93c548838f68	7243816c-c5c4-4831-829f-42056a7ee00c	TCGA-ET-A3DV-01A-12D-A202-08	TCGA-ET-A3DV-01A-12D-A202-08	DO40496	#N/A	#N/A
19233fd1-5229-466e-acf3-5882165758e0	f1533ecf-fa17-42e8-9c81-c816325ac53a	TCGA-BJ-A28V-01A-11D-A19J-08	TCGA-BJ-A28V-01A-11D-A19J-08	DO39070	#N/A	#N/A
7dfcfe29-3900-4d7b-8067-60c51584b0b1	d9129e5b-c872-4c38-bd20-5811a84e67d4	TCGA-DE-A0Y3-01B-11D-A10S-08	TCGA-DE-A0Y3-01B-11D-A10S-08	DO38946	#N/A	#N/A
1924d200-6929-4eef-8a7f-317f8fbab915	42be1671-6d8e-482e-b0d0-bef2158d4130	TCGA-DJ-A13L-01A-11D-A21Z-08	TCGA-DJ-A13L-01A-11D-A21Z-08	DO219585	#N/A	#N/A
1bbb522d-e224-4b3f-9e10-3a47d06b2b05	c94e52d1-d3ae-45be-bca3-b9885b752480	TCGA-EM-A3FL-01A-11D-A21A-08	TCGA-EM-A3FL-01A-11D-A21A-08	DO48065	#N/A	#N/A
add0b0f6-b4a8-4b73-b634-c3600dc567d5	4b4ffa08-64e7-4c18-87c9-7056d1e3c71e	TCGA-BJ-A0ZB-01A-11D-A10S-08	TCGA-BJ-A0ZB-01A-11D-A10S-08	DO39363	#N/A	#N/A
546b97b0-ab82-42a1-bbd2-241523278ec3	648f59f0-8aec-45a6-92df-718bf08d92b9	TCGA-L6-A4ET-01A-11D-A257-08	TCGA-L6-A4ET-01A-11D-A257-08	DO40147	#N/A	#N/A
007aab66-2f07-459d-8952-3041d6ea24a8	9f5263b2-b2bc-4e0a-b39e-7529e595c443	TCGA-DJ-A2Q1-01A-22D-A19J-08	TCGA-DJ-A2Q1-01A-22D-A19J-08	DO38966	#N/A	#N/A
79169c46-7049-4576-9885-63973db76ab9	cfb418b8-e65a-410f-b0b2-bb9bc561de9a	TCGA-DJ-A1QL-01A-11D-A14W-08	TCGA-DJ-A1QL-01A-11D-A14W-08	DO40274	#N/A	#N/A
473fe833-fcc6-485e-93d2-95e662c3ef53	4edb4c8d-a621-45f8-baf5-4f4833d0f57b	TCGA-FE-A233-01A-11D-A14W-08	TCGA-FE-A233-01A-11D-A33C-08	DO39084	#N/A	#N/A
7ed3e66e-f784-483f-ac37-1300736584a4	7d0d5249-8767-4969-b1db-2ce072f0bacc	TCGA-ET-A2N1-01A-11D-A18F-08	TCGA-ET-A2N1-01A-11D-A18F-08	DO39804	#N/A	Missing from representative MAF (2583) syn:syn7364961
dbacc1ad-c88a-4bcf-a45f-e9c83c762164	46f9d142-12dd-4bbd-90e2-f24901ef0f9b	TCGA-EM-A3AQ-01A-11D-A20C-08	TCGA-EM-A3AQ-01A-11D-A20C-08	DO40484	#N/A	#N/A
63ea274b-d42b-4787-9c54-8ee95ea376ec	d00b568c-e1e7-4e97-a8ae-eac1f0fd9d76	TCGA-E8-A418-01A-11D-A23M-08	TCGA-E8-A418-01A-11D-A23M-08	DO39481	#N/A	#N/A
2dd5eea1-42a1-4e8b-99ac-20399cc7e15c	1c6295c4-b9cf-4387-b402-4ab787f8db5a	TCGA-BJ-A0Z2-01A-11D-A10S-08	TCGA-BJ-A0Z2-01A-11D-A10S-08	DO39306	#N/A	#N/A
fa837b4d-55a7-4dcf-9fdf-cf9c13644df7	a8b52600-faf0-4ba3-a8c2-2393d15d6581	TCGA-DJ-A2Q8-01A-11D-A18F-08	TCGA-DJ-A2Q8-01A-11D-A18F-08	DO39022	#N/A	#N/A
b1753e9c-29d0-4955-89d2-949cdabd1211	dbd96c28-b7a2-4feb-a39b-4c21760768b9	TCGA-EL-A3CV-01A-11D-A19J-08	TCGA-EL-A3CV-01A-11D-A19J-08	DO38903	#N/A	#N/A
79133e29-ba0b-4e2f-a6d9-bf294c5144f0	78ff9df2-b2ba-4dff-af43-adf17361604b	TCGA-EM-A3FQ-01A-11D-A21A-08	TCGA-EM-A3FQ-01A-11D-A21A-08	DO39534	#N/A	#N/A
af96db5a-684f-41d1-a910-5a5193393d9c	07392f26-ed1a-41a0-87ad-aff035d5e9f2	TCGA-BS-A0TE-01A-11D-A10B-09	TCGA-BS-A0TE-01A-11D-A10B-09	DO43506	#N/A	#N/A
9d2671b9-bd30-4e3c-aa74-01e31dd2531e	a7106d6c-7eb2-48dc-a603-777d2ee56a9e	TCGA-AP-A0LD-01A-11W-A062-09	TCGA-AP-A0LD-01A-11D-A066-09	DO41578	#N/A	Missing from representative MAF (2583) syn:syn7364962
19def402-fb8d-4b27-90dd-ce9135a3c0a2	14b1aa7b-bea7-436b-83c6-cf95bc46343e	TCGA-BS-A0TG-01A-32D-A10B-09	TCGA-BS-A0TG-01A-32D-A10B-09	DO42209	#N/A	#N/A
65f9a820-f026-4a10-8bb7-1fbc3b38321e	21ab51b7-e5e4-45cd-816f-889863ec360a	TCGA-D1-A16G-01A-31D-A12J-09	TCGA-D1-A16G-01A-31D-A12J-09	DO43074	#N/A	#N/A
554b9439-7e11-43ec-8bc3-448c59100b9e	b32e78e9-70f2-4602-a24b-a8eca3ce0932	TCGA-B5-A0K8-01A-11D-A14K-09	TCGA-B5-A0K8-01A-11D-A14K-09	DO40831	#N/A	#N/A
8d4cb709-c95c-4bdc-844b-c0bfa2a3028e	c9e5a3c7-70ef-4b5f-82cd-02d86e523b90	TCGA-BS-A0V8-01A-11D-A122-09	TCGA-BS-A0V8-01A-11D-A122-09	DO42240	#N/A	#N/A
e7d74d34-3255-4c20-90fd-b105e6e229c8	999ec8ec-4294-437b-9eba-4749606b2006	TCGA-BK-A0CC-01A-21D-A272-09	TCGA-BK-A0CC-01A-21D-A013-09	DO40806	#N/A	#N/A
c082dc34-457e-40ec-8258-e11e8ed362c2	e5eec22a-1d9b-4ea4-9ac3-3c8d1c9a219c	TCGA-AX-A05S-01A-11W-A027-09	TCGA-AX-A05S-01A-11D-A013-09	DO43218	#N/A	Missing from representative MAF (2583) syn:syn7364963
eae45fbe-9f7d-4f59-a0a9-1f0f0d69afc4	8e0175fb-75d9-4af5-b5da-640442492090	TCGA-A5-A0G9-01A-11W-A062-09	TCGA-A5-A0G9-01A-11D-A066-09	DO42304	#N/A	#N/A
105a51c4-cc7e-4d0f-9cf8-e4d64a31d14d	8c0ffafa-a5f7-42f7-b780-b9dbcc484586	TCGA-D1-A17K-01A-11D-A12J-09	TCGA-D1-A17K-01A-11D-A325-09	DO42937	#N/A	#N/A
493e7008-551c-4c0e-b567-a0f31868629e	d02b1204-3b79-482a-81fb-17f4e82f6e86	TCGA-B5-A1MY-01A-11D-A142-09	TCGA-B5-A1MY-01A-11D-A142-09	DO43859	#N/A	#N/A
82be6087-a491-42d4-9b48-6a10d1bace18	d07eca5f-d309-4e37-af19-d2cf61e33b3a	TCGA-BS-A0U9-01B-21D-A10M-09	TCGA-BS-A0U9-01B-21D-A10M-09	DO43739	#N/A	#N/A
6e599fcc-d79a-4e0f-b451-c20768c989f9	383d2dc3-60ad-4567-a817-d1f51598ca8b	TCGA-BG-A18C-01A-11D-A12J-09	TCGA-BG-A18C-01A-11D-A325-09	DO42464	#N/A	#N/A
577d5c9e-fbda-41d5-b0b3-cdb733453ea5	177eadd9-85f1-40fb-86b8-ed6b917a512f	TCGA-A5-A0GA-01A-11W-A062-09	TCGA-A5-A0GA-01A-11D-A066-09	DO43763	#N/A	Missing from representative MAF (2583) syn:syn7364964
460f7427-ebcf-404b-9e9e-e0278d0bca95	05956b1c-ee0f-4df2-8bbf-efe349a35b5f	TCGA-AP-A0LF-01A-11D-A122-09	TCGA-AP-A0LF-01A-11D-A122-09	DO43610	#N/A	#N/A
d12cfd8b-682d-41df-acf8-ee7f68a6241c	ef16e5e9-1f5b-421d-900d-744a9f8b97fc	TCGA-B5-A0K3-01A-11W-A062-09	TCGA-B5-A0K3-01A-11D-A325-09	DO43314	#N/A	#N/A
b0a83df8-dd2c-4c1b-b238-9081d2c22258	43260caf-2eda-4ef2-b59f-b2aea48f5517	TCGA-BS-A0TC-01A-11D-A10B-09	TCGA-BS-A0TC-01A-11D-A10B-09	DO42400	#N/A	#N/A
2b78de4e-4c8b-4adf-a058-3dae797e7881	633248aa-e918-4214-aa17-2ffc2c2aa59f	TCGA-AP-A0L9-01A-11W-A062-09	TCGA-AP-A0L9-01A-11D-A066-09	DO40948	#N/A	#N/A
19c1c97f-a3ec-44a8-8a20-6f97caed1a4f	bba92a98-c520-4e1c-8fb5-c2a929c237fd	TCGA-AP-A0LH-01A-11W-A062-09	TCGA-AP-A0LH-01A-11D-A066-09	DO41080	#N/A	#N/A
ed32c725-08ae-48eb-8fa2-719b9aeb7550	fa2b6970-bd9e-4f12-90fb-de38bbe8cac3	TCGA-BK-A139-01A-11D-A272-09	TCGA-BK-A139-01A-11D-A122-09	DO41716	#N/A	#N/A
f7dcc2e4-1fc4-4b39-bc6a-720e66116d68	4987688e-d597-4afe-8f76-dad534ad16b5	TCGA-E6-A1LZ-01A-11D-A142-09	TCGA-E6-A1LZ-01A-11D-A142-09	DO41398	#N/A	#N/A
95e8d38a-122e-494c-a304-bef4275fed7e	61eb21b1-4735-4fee-a4e9-7af83aead0bd	TCGA-DI-A1NN-01A-11D-A16D-09	TCGA-DI-A1NN-01A-11D-A34H-09	DO41911	#N/A	#N/A
b38d0777-4901-48b8-9cdc-33b7f13a424f	36ff5fad-500d-4b5b-bf7b-24ff3d1e67d5	TCGA-A5-A0GJ-01A-11W-A062-09	TCGA-A5-A0GJ-01A-11D-A325-09	DO43210	#N/A	#N/A
55ada396-0878-4724-8ebe-00da367eed3d	c8f057f2-0826-4ddb-a63b-d1cc7fc0cc21	TCGA-AX-A06B-01A-11W-A027-09	TCGA-AX-A06B-01A-11D-A325-09	DO40930	#N/A	#N/A
15d597de-d26c-4ce1-b0cb-077e39b55f30	3c6fa458-4a2f-41b7-a78b-b9e4f4677c63	TCGA-AP-A0L8-01A-11W-A062-09	TCGA-AP-A0L8-01A-11D-A066-09	DO42169	#N/A	#N/A
a0e317b1-3f3b-4d25-b2d9-fcc2211dfda3	d09ecf4e-bba7-4701-97d4-99e925e906b2	TCGA-AP-A0LO-01A-11W-A062-09	TCGA-AP-A0LO-01A-11D-A066-09	DO40867	#N/A	#N/A
23cc70c4-b744-4fa0-a0de-b25c0fdf212f	c3672507-40fc-4124-9867-f311317bd0cc	TCGA-A5-A0GE-01A-11W-A062-09	TCGA-A5-A0GE-01A-11D-A066-09	DO42424	#N/A	#N/A
f7187888-f261-4a39-99b4-966fd7207117	06dc1d9a-5487-42a0-a623-57cd30711c19	TCGA-A5-A0GG-01A-11D-A122-09	TCGA-A5-A0GG-01A-11D-A122-09	#N/A	Missing from MC3 Public release	#N/A
b77084ab-8148-49e0-b3f9-90f7d9ea1862	ec5fd107-deca-4ec0-86c6-1504ee8aab5e	TCGA-AP-A053-01A-21W-A027-09	TCGA-AP-A053-01A-21D-A013-09	DO43378	#N/A	#N/A
bcf858fd-cc3b-4fde-ab10-eb96216f4366	930c6470-2be0-4a96-bcd0-643a46c392f1	TCGA-AP-A051-01A-21W-A027-09	TCGA-AP-A051-01A-21D-A013-09	DO42673	#N/A	Missing from representative MAF (2583) syn:syn7364965
8dd14f0e-8601-4aa1-864c-3c49e768cdd1	e22f24f3-a485-4b4d-b3a9-535824a2bb5c	TCGA-B5-A0JN-01A-11D-A10B-09	TCGA-B5-A0JN-01A-11D-A10B-09	DO41943	#N/A	#N/A
00db4dc2-3ec7-4ff9-9233-d69c8c8a607f	8f69ed5f-31e6-4c3c-8996-e55a9a0cce66	TCGA-AX-A1C8-01A-11D-A135-09	TCGA-AX-A1C8-01A-11D-A135-09	DO43338	#N/A	#N/A
c75cc75a-7496-420f-b526-ea63c77e9839	d517f049-838d-4c3e-9107-01b2ad8c9012	TCGA-AP-A052-01A-11W-A027-09	TCGA-AP-A052-01A-11D-A013-09	DO42881	#N/A	#N/A
0c39c03a-ec84-42c6-be69-8e98bc7a9f5a	3eb69789-852b-442d-8c80-39d1cef1a0ed	TCGA-EY-A1GS-01A-11D-A13L-09	TCGA-EY-A1GS-01A-11D-A13L-09	DO43162	#N/A	#N/A
99696731-c88f-427b-975b-1d90013e63ff	0cd2b061-83fb-4372-bdc3-9f13835ffb3f	TCGA-AP-A05A-01A-11W-A027-09	TCGA-AP-A05A-01A-11D-A013-09	DO41530	#N/A	#N/A
cc19a480-9c66-4ee8-a0c0-921acac02689	eae24d0a-b3b4-4026-b6e6-c5276fa5a4c8	TCGA-AX-A2H5-01A-11D-A17D-09	TCGA-AX-A2H5-01A-11D-A34H-09	DO41157	#N/A	#N/A
0385961e-ea99-40b2-ad79-6872bc30d8a1	44f61136-2a84-45b2-90ff-c5826e8f46e8	TCGA-AP-A0LL-01A-12D-A127-09	TCGA-AP-A0LL-01A-12D-A127-09	DO41446	#N/A	#N/A
42de1441-6f3c-4b4d-b8b8-ad91e4b1dbe2	ab7e911d-1304-4a9a-b628-c818f18e55fe	TCGA-B5-A11G-01A-13D-A122-09	TCGA-B5-A11G-01A-13D-A122-09	DO43514	#N/A	#N/A
96f337d2-cec4-4484-87cd-ab2109d2bf50	d4f9750c-92bd-425a-80b6-e9757f76c179	TCGA-AJ-A23M-01A-11D-A159-09	TCGA-AJ-A23M-01A-11D-A34H-09	DO41217	#N/A	#N/A
7364a112-61b9-41c6-b85f-18c97c54cefd	f85d4988-b08f-4553-95b3-ceee4631a49c	TCGA-AP-A054-01A-11W-A062-09	TCGA-AP-A054-01A-11D-A066-09	DO42256	#N/A	#N/A
638e80c7-9a6e-4a32-a621-fc4168e72343	007758c2-9d1a-4ac6-b15b-ea0ccb831263	TCGA-AP-A0LE-01A-11D-A127-09	TCGA-AP-A0LE-01A-11D-A127-09	DO43418	#N/A	Missing from representative MAF (2583) syn:syn7364966
ea6efcd1-11de-45f0-8bde-f1c06ad27e79	8e0f8518-18bb-4e98-8386-82043580912a	TCGA-EO-A1Y8-01A-11D-A159-09	TCGA-EO-A1Y8-01A-11D-A159-09	DO41343	#N/A	#N/A
accfc45b-eae0-4991-a488-e217cdb46655	fdd8b51f-da79-4420-ad0a-e3320369665c	TCGA-B5-A11H-01A-11D-A122-09	TCGA-B5-A11H-01A-11D-A122-09	DO42825	#N/A	Missing from representative MAF (2583) syn:syn7364967
dec775c5-7d9a-4dc5-b399-dc4b7ba49d73	fb6d8712-1ff5-4f70-b11f-b3d5d81f3b1f	TCGA-AP-A0LI-01A-11W-A062-09	TCGA-AP-A0LI-01A-11D-A066-09	DO43658	#N/A	#N/A
fd504153-3cf6-44b9-99d5-21961ebac188	16013308-e756-4f80-a3e3-b2fce6a6cb7b	TCGA-D1-A1NU-01A-11D-A14G-09	TCGA-D1-A1NU-01A-11D-A34H-09	DO43811	#N/A	#N/A
950486ad-14f8-480a-b079-9cc3cd842090	178075dc-51c1-4b76-b6ee-25d4366ae7fd	TCGA-AX-A0J1-01A-11W-A062-09	TCGA-AX-A0J1-01A-11D-A066-09	DO41199	#N/A	Missing from representative MAF (2583) syn:syn7364968
31bc44b9-35ff-43fd-8a01-a834f3b1ce46	b2208d48-78d4-46d6-bc21-b61b7da64893	TCGA-B5-A11I-01A-11D-A10M-09	TCGA-B5-A11I-01A-11D-A10M-09	DO41229	#N/A	#N/A
82d2ea5f-ebdc-4907-a287-fe837fd6b59c	293766eb-3919-4813-953a-43a98bc3f964	TCGA-AP-A05D-01A-11W-A027-09	TCGA-AP-A05D-01A-11D-A013-09	DO41951	#N/A	#N/A
ec31e921-0782-4f77-ac23-4190af1e61ee	f05acf8d-c868-4351-bf5d-14be10722f2c	TCGA-EY-A1GW-01A-22D-A13L-09	TCGA-EY-A1GW-01A-22D-A13L-09	DO42536	#N/A	#N/A
92126163-00c3-41f2-9ce6-7aad5f621407	08548ce5-4cad-416b-9e18-ce6243bc1f9a	TCGA-AX-A1CI-01A-11D-A135-09	TCGA-AX-A1CI-01A-11D-A135-09	DO42544	#N/A	#N/A
712ba532-fb1a-43fa-a356-b446b509ceb7	d42f3923-4f0d-44ae-b36d-6ebce35aabb0	TCGA-BS-A0TD-01A-11D-A10B-09	TCGA-BS-A0TD-01A-11D-A10B-09	DO42432	#N/A	#N/A
