# Supplementary material for: Retrospective evaluation of whole exome and genome mutation calls in 746 cancer samples
Source: Nat Commun. 2020 Sep 21;11:4748. doi: 10.1038/s41467-020-18151-y (PMC7505971; doi:10.1038/s41467-020-18151-y)
Supplement: Supplementary file 4 — Supplementary Data 2 [file 41467_2020_18151_MOESM4_ESM.xlsx]

## Sheet: Sheet1
Supplementary Data 2		Filter criteria. See Methods
	A	B	C	D	TOT	G1	G3	MATCH	MC3	PCAWG
1)	445	97	70	26	638	0.697492	0.109718	140921	18179	25639
2)	519	126	73	26	744	0.697581	0.0981183	155860	21626	25639
3)	468	98	70	23	659	0.710167	0.106221	142911	19047	25639
4)	519	126	73	26	744	0.697581	0.0981183	155860	21616	25639
5)	519	126	73	26	744	0.697581	0.0981183	155839	21572	25639
1 Only consider variants labeled PASS by the MC3 filter column.
2 Only remove variants labeled oxog by MC3.
3 Prioritize G1 (samples in the most recoverable quadrant, MC3 and PCAWG samples with greater than or equal to 80% from both efforts.)
4 Prioritize total number of matched variants.
5 Maximize total number of samples in the most recoverable quadrant while maximizing the difference between MC3 variants and matched variants.
A-D are quadrants of Fig. 2b
