# Supplementary material for: Retrospective evaluation of whole exome and genome mutation calls in 746 cancer samples
Source: Nat Commun. 2020 Sep 21;11:4748. doi: 10.1038/s41467-020-18151-y (PMC7505971; doi:10.1038/s41467-020-18151-y)
Supplement: Supplementary file 5 — Supplementary Data 3 [file 41467_2020_18151_MOESM5_ESM.xlsx]

## Sheet: Sheet1
Supplementary Data 3		TCGA subtype selection preference to WGS sequencing
Cancer	HISTOLOGY	Pval	OddsRat	Conf95Low	Conf95High	WGSratio	TCGAratio	WGS_yes	WGS_tot	TCGA_yes	TCGA_tot	FDR
ACC	Adrenocortical carcinoma- Usual Type	1	0	0	Inf	NA	0.945652	0	0	87	92	1
ACC	Adrenocortical Carcinoma- Oncocytic Type	1	0	0	Inf	NA	0.0434783	0	0	4	92	1
ACC	Adrenocortical Carcinoma- Myxoid Type	1	0	0	Inf	NA	0.0108696	0	0	1	92	1
BLCA	Muscle invasive urothelial carcinoma (pT2 or above)	1	Inf	0.0213926	Inf	1	0.992718	22	22	409	412	1
BLCA	[Not Available]	1	0	0	46.7451	0	0.00728155	0	22	3	412	1
BRCA	Infiltrating Lobular Carcinoma	0.00054832	0.21548	0.0566742	0.583196	0.0465116	0.184713	4	86	203	1099	0.0275693
BRCA	Infiltrating Ductal Carcinoma	0.00103859	2.7133	1.40876	5.74456	0.872093	0.715196	75	86	786	1099	0.0292034
BRCA	Other specify	0.41089	1.41256	0.426247	3.68237	0.0581395	0.0418562	5	86	46	1099	1
BRCA	Mixed Histology (please specify)	0.161601	0	0	1.66269	0	0.0272975	0	86	30	1099	1
BRCA	Mucinous Carcinoma	0.628354	0	0	3.1121	0	0.0154686	0	86	17	1099	1
BRCA	Metaplastic Carcinoma	1	0	0	6.53756	0	0.00818926	0	86	9	1099	1
BRCA	Infiltrating Carcinoma NOS	1	0	0	494.54	0	0.000909918	0	86	1	1099	1
BRCA	Medullary Carcinoma	0.41068	2.14135	0.0460568	17.9615	0.0116279	0.00545951	1	86	6	1099	1
BRCA	[Not Available]	0.139938	12.8482	0.162662	1005.64	0.0116279	0.000909918	1	86	1	1099	1
CESC	Adenosquamous	1	0	0	13.7044	0	0.0194805	0	20	6	308	1
CESC	Cervical Squamous Cell Carcinoma	0.545838	1.91024	0.436151	17.4641	0.9	0.824675	18	20	254	308	1
CESC	Endocervical Type of Adenocarcinoma	0.640977	1.51625	0.16012	7.06689	0.1	0.0681818	2	20	21	308	1
CESC	Endocervical Adenocarcinoma of the Usual Type	1	0	0	13.7044	0	0.0194805	0	20	6	308	1
CESC	Mucinous Adenocarcinoma of Endocervical Type	0.611413	0	0	3.85164	0	0.0551948	0	20	17	308	1
CESC	Endometrioid Adenocarcinoma of Endocervix	1	0	0	24.2812	0	0.012987	0	20	4	308	1
CHOL	Cholangiocarcinoma; intrahepatic	1	0	0	Inf	NA	0.833333	0	0	30	36	1
CHOL	Cholangiocarcinoma; distal	1	0	0	Inf	NA	0.0555556	0	0	2	36	1
CHOL	Cholangiocarcinoma; hilar/perihilar	1	0	0	Inf	NA	0.111111	0	0	4	36	1
COAD	Colon Adenocarcinoma	0.610594	0.769577	0.296196	2.36693	0.818182	0.854031	27	33	392	459	1
COAD	Colon Mucinous Adenocarcinoma	0.435216	1.4218	0.461164	3.70624	0.181818	0.135076	6	33	62	459	1
COAD	[Not Available]	1	0	0	74.8318	0	0.0043573	0	33	2	459	1
COAD	[Discrepancy]	1	0	0	34.2795	0	0.00653595	0	33	3	459	1
DLBC	Diffuse large B-cell lymphoma (DLBCL) NOS (any anatomic site nodal or extranodal)	1	0.856245	0.0763381	46.0733	0.833333	0.854167	5	6	41	48	1
DLBC	Primary mediastinal (thymic) DLBCL	0.458562	2.15946	0.0372967	28.8617	0.166667	0.0833333	1	6	4	48	1
DLBC	Primary DLBCL of the CNS	1	0	0	21.4611	0	0.0625	0	6	3	48	1
ESCA	Esophagus Adenocarcinoma NOS	1	0	0	Inf	NA	0.481081	0	0	89	185	1
ESCA	Esophagus Squamous Cell Carcinoma	1	0	0	Inf	NA	0.518919	0	0	96	185	1
GBM	Untreated primary (de novo) GBM	0.0993481	Inf	0.761519	Inf	1	0.91443	33	33	545	596	1
GBM	Treated primary GBM	0.6173	0	0	3.73007	0	0.033557	0	33	20	596	1
GBM	Glioblastoma Multiforme (GBM)	0.398139	0	0	2.28862	0	0.0520134	0	33	31	596	1
HNSC	Head and Neck Squamous Cell Carcinoma	0.604586	0.872562	0.121204	38.4527	0.97619	0.979167	41	42	517	528	1
HNSC	Head and Neck Squamous Cell Carcinoma Basaloid Type	0.572464	1.26284	0.0284277	9.27774	0.0238095	0.0189394	1	42	10	528	1
HNSC	Head and Neck Squamous Cell Carcinoma Spindle Cell Variant	1	0	0	486.566	0	0.00189394	0	42	1	528	1
KICH	Kidney Chromophobe	1	0	0	Inf	1	1	43	43	113	113	1
KIRC	Kidney Clear Cell Renal Carcinoma	1	0	0	Inf	1	1	27	27	537	537	1
KIRP	Kidney Papillary Renal Cell Carcinoma	1	0	0	Inf	1	1	32	32	291	291	1
LGG	Astrocytoma	0.000290983	0	0	0.382412	0	0.376699	0	18	194	515	0.0237151
LGG	Oligodendroglioma	3.02276e-08	Inf	7.32463	Inf	1	0.370874	18	18	191	515	4.9271e-06
LGG	Oligoastrocytoma	0.00978068	0	0	0.686347	0	0.252427	0	18	130	515	0.199281
LIHC	Hepatocellular Carcinoma	0.642888	0.668305	0.136472	6.45086	0.960784	0.973475	49	51	367	377	1
LIHC	Hepatocholangiocarcinoma (Mixed)	1	1.05702	0.0230018	8.50911	0.0196078	0.0185676	1	51	7	377	1
LIHC	Fibrolamellar Carcinoma	0.399156	2.48589	0.046573	31.6353	0.0196078	0.00795756	1	51	3	377	1
LUAD	Lung Adenocarcinoma- Not Otherwise Specified (NOS)	0.860153	0.937201	0.446479	2.03019	0.611111	0.626437	22	36	327	522	1
LUAD	Lung Adenocarcinoma Mixed Subtype	0.525537	1.2922	0.518707	2.93606	0.25	0.204981	9	36	107	522	1
LUAD	Lung Papillary Adenocarcinoma	0.671668	1.2756	0.140077	5.53473	0.0555556	0.0440613	2	36	23	522	1
LUAD	Lung Mucinous Adenocarcinoma	0.181634	7.36841	0.122447	144.894	0.0277778	0.00383142	1	36	2	522	1
LUAD	Mucinous (Colloid) Carcinoma	0.523121	1.46167	0.032783	10.8166	0.0277778	0.0191571	1	36	10	522	1
LUAD	Lung Clear Cell Adenocarcinoma	1	0	0	77.9161	0	0.00383142	0	36	2	522	1
LUAD	Lung Acinar Adenocarcinoma	0.621084	0	0	3.34527	0	0.0344828	0	36	18	522	1
LUAD	Lung Bronchioloalveolar Carcinoma Nonmucinous	1	0.756704	0.0177048	5.04967	0.0277778	0.0363985	1	36	19	522	1
LUAD	Lung Bronchioloalveolar Carcinoma Mucinous	1	0	0	16.2061	0	0.00957854	0	36	5	522	1
LUAD	Lung Solid Pattern Predominant Adenocarcinoma	1	0	0	16.2061	0	0.00957854	0	36	5	522	1
LUAD	Lung Micropapillary Adenocarcinoma	1	0	0	35.708	0	0.00574713	0	36	3	522	1
LUAD	Lung Signet Ring Adenocarcinoma	1	0	0	560.556	0	0.00191571	0	36	1	522	1
LUSC	Lung Squamous Cell Carcinoma- Not Otherwise Specified (NOS)	0.710763	2.09745	0.323522	88.4853	0.978723	0.956349	46	47	482	504	1
LUSC	Lung Basaloid Squamous Cell Carcinoma	1	0.709092	0.0164808	4.81555	0.0212766	0.0297619	1	47	15	504	1
LUSC	Lung Small Cell Squamous Cell Carcinoma	1	0	0	415.504	0	0.00198413	0	47	1	504	1
LUSC	Lung Papillary Squamous Cell Caricnoma	1	0	0	9.26456	0	0.0119048	0	47	6	504	1
MESO	Diffuse malignant mesothelioma - NOS	1	0	0	Inf	NA	0.0574713	0	0	5	87	1
MESO	Epithelioid mesothelioma	1	0	0	Inf	NA	0.655172	0	0	57	87	1
MESO	Biphasic mesothelioma	1	0	0	Inf	NA	0.264368	0	0	23	87	1
MESO	Sarcomatoid mesothelioma	1	0	0	Inf	NA	0.0229885	0	0	2	87	1
OV	Serous Cystadenocarcinoma	1	0	0	Inf	1	1	26	26	587	587	1
PAAD	Pancreas-Adenocarcinoma-Other Subtype	1	0	0	Inf	NA	0.135135	0	0	25	185	1
PAAD	Pancreas-Adenocarcinoma Ductal Type	1	0	0	Inf	NA	0.832432	0	0	154	185	1
PAAD	Pancreas-Undifferentiated Carcinoma	1	0	0	Inf	NA	0.00540541	0	0	1	185	1
PAAD	Pancreas-Colloid (mucinous non-cystic) Carcinoma	1	0	0	Inf	NA	0.0216216	0	0	4	185	1
PAAD	[Discrepancy]	1	0	0	Inf	NA	0.00540541	0	0	1	185	1
PCPG	Pheochromocytoma	1	0	0	Inf	NA	0.826816	0	0	148	179	1
PCPG	Paraganglioma	1	0	0	Inf	NA	0.100559	0	0	18	179	1
PCPG	Paraganglioma; Extra-adrenal Pheochromocytoma	1	0	0	Inf	NA	0.0726257	0	0	13	179	1
PRAD	Prostate Adenocarcinoma Acinar Type	1	Inf	0.128717	Inf	1	0.97	19	19	485	500	1
PRAD	Prostate Adenocarcinoma Other Subtype	1	0	0	7.76896	0	0.03	0	19	15	500	1
READ	Rectal Adenocarcinoma	1	1.37286	0.180053	62.2454	0.916667	0.888889	11	12	152	171	1
READ	[Not Available]	1	0	0	13.0838	0	0.0350877	0	12	6	171	1
READ	Rectal Mucinous Adenocarcinoma	1	1.10424	0.0238573	8.79894	0.0833333	0.0760234	1	12	13	171	1
SARC	Dedifferentiated liposarcoma	0.000676548	3.89035	1.67144	9.16829	0.533333	0.226054	16	30	59	261	0.0275693
SARC	Leiomyosarcoma (LMS)	0.558168	1.29879	0.561004	2.97616	0.466667	0.402299	14	30	105	261	1
SARC	Myxofibrosarcoma	0.0892	0	0	1.33658	0	0.0957854	0	30	25	261	1
SARC	Pleomorphic 'MFH'/ Undifferentiated pleomorphic sarcoma	0.0546364	0	0	1.1222	0	0.111111	0	30	29	261	0.742144
SARC	Synovial Sarcoma - Biphasic	1	0	0	46.8629	0	0.00766284	0	30	2	261	1
SARC	Synovial Sarcoma - Monophasic	1	0	0	7.56949	0	0.0229885	0	30	6	261	1
SARC	Undifferentiated Pleomorphic Sarcoma (UPS)	0.144536	0	0	1.6393	0	0.0804598	0	30	21	261	1
SARC	Sarcoma; synovial; poorly differentiated	1	0	0	46.8629	0	0.00766284	0	30	2	261	1
SARC	Giant cell 'MFH' / Undifferentiated pleomorphic sarcoma with giant cells	1	0	0	337.516	0	0.00383142	0	30	1	261	1
SARC	Malignant Peripheral Nerve Sheath Tumors (MPNST)	0.604938	0	0	4.4953	0	0.0344828	0	30	9	261	1
SARC	Desmoid Tumor	1	0	0	46.8629	0	0.00766284	0	30	2	261	1
SKCM	[Not Available]	1	0	0	Inf	1	1	37	37	471	471	1
STAD	Stomach Adenocarcinoma Not Otherwise Specified (NOS)	0.858546	1.08241	0.497497	2.28314	0.388889	0.370203	14	36	164	443	1
STAD	Stomach Adenocarcinoma Diffuse Type	0.354574	1.4709	0.556355	3.48421	0.222222	0.162528	8	36	72	443	1
STAD	Stomach Intestinal Adenocarcinoma Not Otherwise Specified (NOS)	0.366877	0.550902	0.13774	1.61633	0.111111	0.185102	4	36	82	443	1
STAD	Stomach Intestinal Adenocarcinoma Tubular Type	0.368112	0.576529	0.144026	1.69355	0.111111	0.17833	4	36	79	443	1
STAD	Stomach Intestinal Adenocarcinoma Papillary Type	0.0423607	4.91281	0.802245	21.7377	0.0833333	0.0180587	3	36	8	443	0.690479
STAD	Stomach Intestinal Adenocarcinoma Mucinous Type	0.422113	1.73719	0.316665	6.25057	0.0833333	0.0496614	3	36	22	443	1
STAD	Stomach Adenocarcinoma Signet Ring Type	0.612026	0	0	4.10951	0	0.0293454	0	36	13	443	1
STAD	[Not Available]	1	0	0	66.1706	0	0.00451467	0	36	2	443	1
STAD	[Discrepancy]	1	0	0	476.352	0	0.00225734	0	36	1	443	1
TGCT	Seminoma; NOS	1	0	0	Inf	NA	0.477612	0	0	64	134	1
TGCT	Non-Seminoma; Embryonal Carcinoma|Non-Seminoma; Yolk Sac Tumor	1	0	0	Inf	NA	0.0447761	0	0	6	134	1
TGCT	Non-Seminoma; Teratoma (Mature)|Non-Seminoma; Yolk Sac Tumor	1	0	0	Inf	NA	0.0149254	0	0	2	134	1
TGCT	Non-Seminoma; Embryonal Carcinoma	1	0	0	Inf	NA	0.11194	0	0	15	134	1
TGCT	Non-Seminoma; Yolk Sac Tumor	1	0	0	Inf	NA	0.0223881	0	0	3	134	1
TGCT	Non-Seminoma; Teratoma (Immature)|Non-Seminoma; Yolk Sac Tumor|Non-Seminoma; Embryonal Carcinoma|Non-Seminoma; Teratoma (Mature)	1	0	0	Inf	NA	0.00746269	0	0	1	134	1
TGCT	Non-Seminoma; Embryonal Carcinoma|Non-Seminoma; Yolk Sac Tumor|Non-Seminoma; Teratoma (Mature)	1	0	0	Inf	NA	0.00746269	0	0	1	134	1
TGCT	Non-Seminoma; Teratoma (Mature)|Seminoma; NOS|Non-Seminoma; Embryonal Carcinoma|Non-Seminoma; Yolk Sac Tumor	1	0	0	Inf	NA	0.0149254	0	0	2	134	1
TGCT	Non-Seminoma; Teratoma (Mature)	1	0	0	Inf	NA	0.0149254	0	0	2	134	1
TGCT	Non-Seminoma; Embryonal Carcinoma|Non-Seminoma; Teratoma (Mature)|Non-Seminoma; Teratoma (Immature)|Non-Seminoma; Yolk Sac Tumor	1	0	0	Inf	NA	0.00746269	0	0	1	134	1
TGCT	Non-Seminoma; Teratoma (Mature)|Non-Seminoma; Teratoma (Immature)|Non-Seminoma; Embryonal Carcinoma|Non-Seminoma; Yolk Sac Tumor	1	0	0	Inf	NA	0.0298507	0	0	4	134	1
TGCT	Non-Seminoma; Embryonal Carcinoma|Seminoma; NOS	1	0	0	Inf	NA	0.0149254	0	0	2	134	1
TGCT	Non-Seminoma; Yolk Sac Tumor|Non-Seminoma; Embryonal Carcinoma	1	0	0	Inf	NA	0.0149254	0	0	2	134	1
TGCT	Non-Seminoma; Teratoma (Immature)|Non-Seminoma; Yolk Sac Tumor	1	0	0	Inf	NA	0.00746269	0	0	1	134	1
TGCT	Non-Seminoma; Yolk Sac Tumor|Non-Seminoma; Teratoma (Mature)	1	0	0	Inf	NA	0.00746269	0	0	1	134	1
TGCT	Non-Seminoma; Teratoma (Mature)|Non-Seminoma; Embryonal Carcinoma|Non-Seminoma; Teratoma (Immature)|Non-Seminoma; Yolk Sac Tumor	1	0	0	Inf	NA	0.00746269	0	0	1	134	1
TGCT	Non-Seminoma; Teratoma (Mature)|Non-Seminoma; Teratoma (Immature)|Non-Seminoma; Embryonal Carcinoma	1	0	0	Inf	NA	0.00746269	0	0	1	134	1
TGCT	Non-Seminoma; Embryonal Carcinoma|Non-Seminoma; Teratoma (Mature)|Non-Seminoma; Choriocarcinoma|Non-Seminoma; Yolk Sac Tumor|Seminoma; NOS	1	0	0	Inf	NA	0.00746269	0	0	1	134	1
TGCT	Seminoma; NOS|Non-Seminoma; Embryonal Carcinoma	1	0	0	Inf	NA	0.00746269	0	0	1	134	1
TGCT	Non-Seminoma; Teratoma (Mature)|Non-Seminoma; Teratoma (Immature)|Non-Seminoma; Yolk Sac Tumor|Non-Seminoma; Embryonal Carcinoma|Seminoma; NOS	1	0	0	Inf	NA	0.0149254	0	0	2	134	1
TGCT	Seminoma; NOS|Non-Seminoma; Teratoma (Mature)|Non-Seminoma; Teratoma (Immature)|Non-Seminoma; Yolk Sac Tumor	1	0	0	Inf	NA	0.00746269	0	0	1	134	1
TGCT	Non-Seminoma; Yolk Sac Tumor|Non-Seminoma; Embryonal Carcinoma|Non-Seminoma; Teratoma (Mature)|Seminoma; NOS	1	0	0	Inf	NA	0.00746269	0	0	1	134	1
TGCT	Non-Seminoma; Teratoma (Mature)|[Not Available]|Non-Seminoma; Embryonal Carcinoma|Non-Seminoma; Yolk Sac Tumor	1	0	0	Inf	NA	0.00746269	0	0	1	134	1
TGCT	Non-Seminoma; Yolk Sac Tumor|Non-Seminoma; Embryonal Carcinoma|Non-Seminoma; Teratoma (Mature)|Non-Seminoma; Teratoma (Immature)	1	0	0	Inf	NA	0.00746269	0	0	1	134	1
TGCT	Seminoma; NOS|Non-Seminoma; Teratoma (Mature)	1	0	0	Inf	NA	0.00746269	0	0	1	134	1
TGCT	Seminoma; NOS|Non-Seminoma; Teratoma (Mature)|Non-Seminoma; Embryonal Carcinoma|Non-Seminoma; Yolk Sac Tumor	1	0	0	Inf	NA	0.00746269	0	0	1	134	1
TGCT	Non-Seminoma; Embryonal Carcinoma|Non-Seminoma; Yolk Sac Tumor|Non-Seminoma; Teratoma (Mature)|Non-Seminoma; Teratoma (Immature)|Seminoma; NOS	1	0	0	Inf	NA	0.00746269	0	0	1	134	1
TGCT	Non-Seminoma; Embryonal Carcinoma|Non-Seminoma; Teratoma (Mature)	1	0	0	Inf	NA	0.00746269	0	0	1	134	1
TGCT	Seminoma; NOS|Non-Seminoma; Teratoma (Mature)|Non-Seminoma; Embryonal Carcinoma	1	0	0	Inf	NA	0.00746269	0	0	1	134	1
TGCT	Non-Seminoma; Teratoma (Mature)|Non-Seminoma; Teratoma (Immature)|Non-Seminoma; Yolk Sac Tumor|Non-Seminoma; Embryonal Carcinoma|Non-Seminoma; Choriocarcinoma	1	0	0	Inf	NA	0.00746269	0	0	1	134	1
TGCT	Non-Seminoma; Embryonal Carcinoma|[Not Available]	1	0	0	Inf	NA	0.00746269	0	0	1	134	1
TGCT	Seminoma; NOS|Non-Seminoma; Yolk Sac Tumor|Non-Seminoma; Embryonal Carcinoma|Non-Seminoma; Teratoma (Immature)	1	0	0	Inf	NA	0.00746269	0	0	1	134	1
TGCT	Non-Seminoma; Teratoma (Immature)|Non-Seminoma; Yolk Sac Tumor|Non-Seminoma; Embryonal Carcinoma	1	0	0	Inf	NA	0.00746269	0	0	1	134	1
TGCT	Non-Seminoma; Choriocarcinoma|Non-Seminoma; Embryonal Carcinoma|Non-Seminoma; Yolk Sac Tumor|Non-Seminoma; Teratoma (Mature)|Non-Seminoma; Teratoma (Immature)	1	0	0	Inf	NA	0.00746269	0	0	1	134	1
TGCT	Non-Seminoma; Teratoma (Immature)|Non-Seminoma; Teratoma (Mature)|Non-Seminoma; Yolk Sac Tumor	1	0	0	Inf	NA	0.00746269	0	0	1	134	1
TGCT	Seminoma; NOS|Non-Seminoma; Choriocarcinoma	1	0	0	Inf	NA	0.00746269	0	0	1	134	1
TGCT	Seminoma; NOS|Non-Seminoma; Yolk Sac Tumor|Non-Seminoma; Teratoma (Mature)|Non-Seminoma; Teratoma (Immature)	1	0	0	Inf	NA	0.00746269	0	0	1	134	1
TGCT	Non-Seminoma; Embryonal Carcinoma|[Not Available]|[Not Available]|[Not Available]	1	0	0	Inf	NA	0.00746269	0	0	1	134	1
TGCT	Non-Seminoma; Embryonal Carcinoma|Non-Seminoma; Yolk Sac Tumor|Non-Seminoma; Choriocarcinoma	1	0	0	Inf	NA	0.00746269	0	0	1	134	1
TGCT	Non-Seminoma; Teratoma (Immature)	1	0	0	Inf	NA	0.00746269	0	0	1	134	1
TGCT	Non-Seminoma; Embryonal Carcinoma|Non-Seminoma; Yolk Sac Tumor|Non-Seminoma; Teratoma (Immature)	1	0	0	Inf	NA	0.00746269	0	0	1	134	1
THCA	Thyroid Papillary Carcinoma - Classical/usual	0.0479	0.530684	0.278966	1.02128	0.5625	0.708087	27	48	359	507	0.709791
THCA	Thyroid Papillary Carcinoma - Follicular (>= 99% follicular patterned)	0.0254658	2.17383	1.08343	4.23729	0.354167	0.201183	17	48	102	507	0.461214
THCA	Thyroid Papillary Carcinoma - Tall Cell (>= 50% tall cell features)	1	0.847101	0.160763	2.84645	0.0625	0.0729783	3	48	37	507	1
THCA	Other specify	0.598417	1.17693	0.0263073	8.82029	0.0208333	0.0177515	1	48	9	507	1
THYM	Thymoma; Type B1	1	0	0	Inf	NA	0.112903	0	0	14	124	1
THYM	Thymoma; Type A	1	0	0	Inf	NA	0.120968	0	0	15	124	1
THYM	Thymoma; Type B2	1	0	0	Inf	NA	0.225806	0	0	28	124	1
THYM	Thymoma; Type C	1	0	0	Inf	NA	0.0887097	0	0	11	124	1
THYM	Thymoma; Type B3	1	0	0	Inf	NA	0.0967742	0	0	12	124	1
THYM	Thymoma; Type AB	1	0	0	Inf	NA	0.306452	0	0	38	124	1
THYM	Thymoma; Type B2|Thymoma; Type B3	1	0	0	Inf	NA	0.0241935	0	0	3	124	1
THYM	Thymoma; Type A|Thymoma; Type AB	1	0	0	Inf	NA	0.016129	0	0	2	124	1
THYM	Thymoma; Type B1|Thymoma; Type B2	1	0	0	Inf	NA	0.00806452	0	0	1	124	1
UCEC	Endometrioid endometrial adenocarcinoma	0.00366656	0.384061	0.194954	0.762039	0.534884	0.75	23	43	411	548	0.0853784
UCEC	Serous endometrial adenocarcinoma	0.00107497	2.97395	1.48455	5.88749	0.44186	0.209854	19	43	115	548	0.0292034
UCEC	Mixed serous and endometrioid	1	0.569699	0.0134798	3.70812	0.0232558	0.040146	1	43	22	548	1
UCS	Uterine Carcinosarcoma/ MMMT: Heterologous Type	1	0	0	Inf	NA	0.350877	0	0	20	57	1
UCS	Uterine Carcinosarcoma/ MMMT: Homologous Type	1	0	0	Inf	NA	0.22807	0	0	13	57	1
UCS	Uterine Carcinosarcoma/ Malignant Mixed Mullerian Tumor (MMMT): NOS	1	0	0	Inf	NA	0.421053	0	0	24	57	1
UVM	[Not Available]	1	0	0	Inf	NA	1	0	0	80	80	1
