# Supplementary material for: Retrospective evaluation of whole exome and genome mutation calls in 746 cancer samples
Source: Nat Commun. 2020 Sep 21;11:4748. doi: 10.1038/s41467-020-18151-y (PMC7505971; doi:10.1038/s41467-020-18151-y)
Supplement: Supplementary file 7 — Supplementary Data 5 [file 41467_2020_18151_MOESM7_ESM.xlsx]

## Sheet: Sheet1
Supplementary Data 5		Mutation spectrum comparison by cancer
Cancer	stat	pval	fdr
KICH	26.5684	6.92123e-05	0.00152267
COAD	23.6611	0.000252205	0.00277426
LUAD	21.4598	0.000663012	0.00486209
OV	18.2043	0.00270091	0.014855
LIHC	14.6931	0.0117574	0.0517328
READ	12.8935	0.0243974	0.0894572
STAD	10.66	0.0585532	0.184024
LUSC	9.49748	0.0907923	0.249679
SKCM	8.15904	0.147686	0.36101
KIRP	6.76199	0.238952	0.525693
BRCA	4.78043	0.44326	0.750383
GBM	4.77927	0.443408	0.750383
HNSC	5.17094	0.395377	0.750383
BLCA	3.82707	0.574573	0.894447
DLBC	2.35771	0.797755	0.894447
KIRC	3.23492	0.663819	0.894447
LGG	2.94845	0.707933	0.894447
PRAD	2.25308	0.813133	0.894447
SARC	3.06491	0.689979	0.894447
UCEC	2.63999	0.75528	0.894447
CESC	0.612941	0.987403	0.987403
THCA	1.10598	0.953573	0.987403
